# Supplementary material
Source: PubMed Central journal article supplement (PMC3288265)
Supplement: NIHMS354532-supplement-1_si_001.pdf [file NIHMS354532-supplement-1_si_001.pdf]

# Nickel-Catalyzed Enantioselective Cross-Couplings of Racemic Secondary Electrophiles that Bear an Oxygen Leaving Group

Alexander J. Oelke, Jianwei Sun, and Gregory C. Fu\*

*Department of Chemistry, Massachusetts Institute of Technology, Cambridge, Massachusetts 02139*

## Supporting Information

### Table of Contents

|                                                  |      |
|--------------------------------------------------|------|
| I. General                                       | S-1  |
| II. Preparation of Materials                     | S-1  |
| III. Stereoconvergent Cross-Coupling Reactions   | S-9  |
| IV. <sup>1</sup> H NMR Spectra, ee Determination | S-21 |

### I. General

The following reagents were purchased and used as received: NiCl<sub>2</sub>(PCy<sub>3</sub>)<sub>2</sub> (Aldrich or Strem), ligand L\* (Aldrich), 2,4,6-trimethoxybenzaldehyde (Acros, TCI, or Aldrich), phosgene (20% solution in toluene; Aldrich), ZnI<sub>2</sub> (Strem), PhMgBr (1.0 M solution in THF; Aldrich), *p*-TolMgBr (1.0 M solution in THF; Aldrich), 4-chloro-3-fluorophenylmagnesium bromide (1.0 M solution in THF; Aldrich), DME (anhydrous; Aldrich), THF (anhydrous; Aldrich).

Unless otherwise noted, reactions were conducted in oven-dried glassware under an inert atmosphere.

<sup>1</sup>H and <sup>13</sup>C NMR data were collected on a Bruker Avance 400 spectrometer or a Bruker Avance 600 spectrometer at r.t. HPLC analyses were carried out on an Agilent 1100 series system with Daicel CHIRACEL® columns (internal diameter 4.6 mm, column length 250 mm, particle size 5 μm or 3 μm). GC analyses were carried out on an Agilent 6850 series system with a Chirasil Dex-CB column for chiral separation (length 25 m, internal diameter 0.25 mm) or an Agilent 6890N series system with an HP-5 column (length 30 m, internal diameter 0.32 mm).

### II. Preparation of Materials

These procedures have not been optimized.

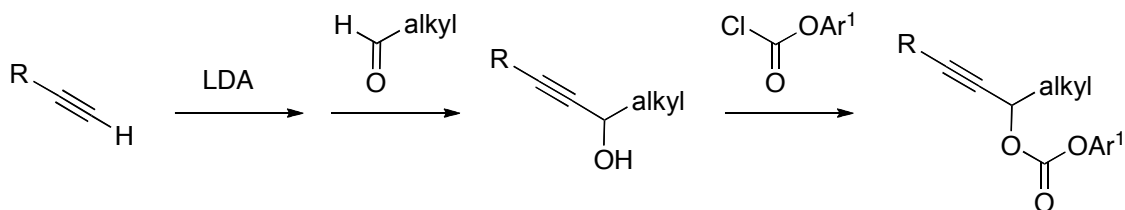

Ar<sup>1</sup> = 2,4,6-trimethoxyphenyl

**Representative procedure for the synthesis of propargylic alcohols:** A solution of LDA (2.0 M in THF/heptane/ethylbenzene; 15 mL, 1.0 equiv) was added over one minute to a solution of TMS-acetylene (4.2 mL, 30 mmol) in THF (150 mL) at 0 °C. The resulting mixture was stirred at r.t. for 30 min, and then it was cooled to -78 °C. Valeraldehyde (4.2 mL, 40 mmol) was added dropwise over one minute. The reaction mixture was allowed to warm to r.t. overnight, and then the reaction was quenched by the addition of aqueous HCl (1 M; 10 mL). Next, saturated aqueous NaCl (30 mL) was added, and the layers were separated. The organic layer was washed with saturated aqueous NaHCO<sub>3</sub> (50 mL), dried over Na<sub>2</sub>SO<sub>4</sub>, and concentrated. Purification by flash chromatography afforded the propargylic alcohol as a pale-yellow liquid (4.6 g, 82%).

**Representative procedure for the synthesis of propargylic carbonates:**

1. Preparation of the chloroformate: A solution of 2,4,6-trimethoxyphenol<sup>1</sup> (4.4 g, 23 mmol) and triethylamine (4.4 mL, 31 mmol) in toluene (10 mL) was added to a solution of phosgene (20%; 60 mL, 118 mmol) in toluene (200 mL) at 0 °C. The mixture was stirred at 0 °C for 45 min, and then the excess phosgene was removed by purging the mixture with nitrogen or argon for 16 h (quenching the gas stream with KOH).

2. A solution of the propargylic alcohol (3.7 g, 20 mmol) and pyridine (2.5 mL, 30 mmol) in toluene (5 mL) was added to the 0 °C mixture containing the chloroformate. The resulting reaction mixture was allowed to warm to r.t. overnight. Next, saturated aqueous NaHCO<sub>3</sub> (50 mL) was added, and the organic layer was separated and concentrated. The residue was dissolved in ethyl acetate (25 mL), and the solution was washed with saturated aqueous NaHCO<sub>3</sub> (25 mL), water (25 mL), and brine (10 mL), and then dried over Na<sub>2</sub>SO<sub>4</sub>. The solvent was removed in vacuo. Flash chromatography of the residue afforded the propargylic carbonate as a colorless solid (4.2 g, 53%).

(1) Matsumoto, M.; Kobayashi, H.; Hotta, Y. *J. Org. Chem.* **1984**, *49*, 4740–4741.

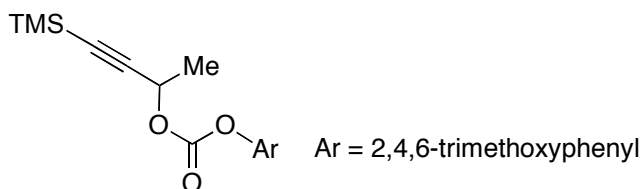

**2,4,6-Trimethoxyphenyl (4-(trimethylsilyl)but-3-yn-2-yl) carbonate.** The title compound was synthesized from TMS-acetylene and acetaldehyde, and it was purified by chromatography (0%→100% Et<sub>2</sub>O/hexanes), which afforded a colorless solid.

<sup>1</sup>H NMR (600 MHz, CDCl<sub>3</sub>) δ 6.18 (s, 2H), 5.40 (q, *J* = 6.6 Hz, 1H), 3.83 (s, 6H), 3.81 (s, 3H), 1.62 (d, *J* = 6.7 Hz, 3H), 0.20 (s, 9H).

<sup>13</sup>C NMR (150 MHz, CDCl<sub>3</sub>) δ 158.6, 152.8, 152.7, 123.7, 102.7, 91.6, 90.8, 65.7, 56.3, 55.7, 21.5, 0.0.

FT-IR (neat) 2961, 2349, 1766, 1600, 1511, 1470, 1252, 1207, 1134, 1042, 929, 846 cm<sup>-1</sup>.

MS (ESI) *m/z* (M+H<sup>+</sup>) calcd for C<sub>17</sub>H<sub>25</sub>O<sub>6</sub>Si: 353.1, found: 353.1.

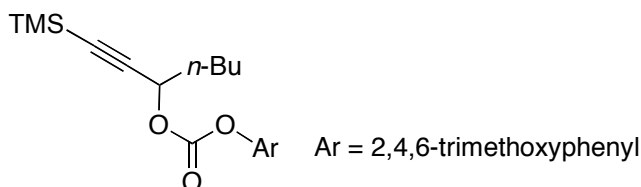

**2,4,6-Trimethoxyphenyl (1-(trimethylsilyl)hept-1-yn-3-yl) carbonate.** The title compound was synthesized from TMS-acetylene and valeraldehyde, and it was purified by chromatography (0%→100% Et<sub>2</sub>O/hexanes), which afforded a colorless solid.

<sup>1</sup>H NMR (600 MHz, CDCl<sub>3</sub>) δ 6.18 (s, 2H), 5.33 (t, *J* = 6.6 Hz, 1H), 3.84 (s, 6H), 3.83 (s, 3H), 1.95–1.83 (m, 2H), 1.53–1.47 (m, 2H), 1.43–1.35 (m, 2H), 0.95 (t, *J* = 7.3 Hz, 3H), 0.20 (s, 9H).

<sup>13</sup>C NMR (150 MHz, CDCl<sub>3</sub>) δ 158.5, 152.9, 152.8, 123.8, 102.0, 91.6, 91.5, 69.5, 56.3, 55.7, 34.7, 27.1, 22.3, 14.1, 0.0.

FT-IR (neat) 2959, 2179, 1768, 1617, 1510, 1458, 1252, 1133, 1036, 951, 844, 761 cm<sup>-1</sup>.

MS (ESI) *m/z* (M+H<sup>+</sup>) calcd for C<sub>20</sub>H<sub>31</sub>O<sub>6</sub>Si: 395.2, found: 395.2.

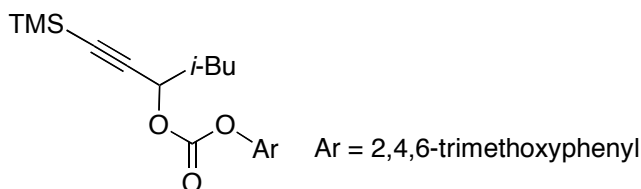

**5-Methyl-1-(trimethylsilyl)hex-1-yn-3-yl (2,4,6-trimethoxyphenyl) carbonate.** The title compound was synthesized from TMS-acetylene and isovaleraldehyde, and it was purified by chromatography (0%→100% Et<sub>2</sub>O/hexanes), which afforded a colorless solid.

$^1\text{H}$  NMR (600 MHz,  $\text{CDCl}_3$ )  $\delta$  6.16 (s, 2H), 5.35 (t,  $J = 8.3$  Hz, 1H), 3.81 (s, 6H), 3.79 (s, 3H), 1.93–1.80 (m, 2H), 1.74–1.66 (m, 1H), 0.97 (app t,  $J = 7.1$  Hz, 6H), 0.18 (s, 9H).

$^{13}\text{C}$  NMR (150 MHz,  $\text{CDCl}_3$ )  $\delta$  158.0, 152.4, 152.3, 123.3, 101.7, 91.1, 91.0, 67.8, 55.8, 55.2, 43.3, 24.3, 22.0, -0.5.

FT-IR (neat) 2959, 1766, 1600, 1512, 1469, 1207, 1134, 1037, 845  $\text{cm}^{-1}$ .

MS (ESI)  $m/z$  ( $\text{M}+\text{H}^+$ ) calcd for  $\text{C}_{20}\text{H}_{31}\text{O}_6\text{Si}$ : 395.2, found: 395.2.

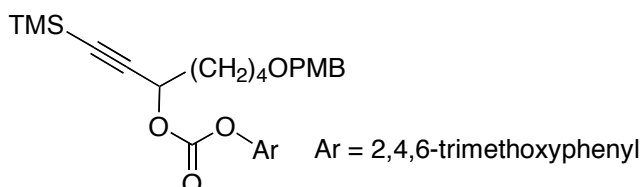

**7-((4-Methoxybenzyl)oxy)-1-(trimethylsilyl)hept-1-yn-3-yl (2,4,6-trimethoxyphenyl) carbonate.** The title compound was synthesized from TMS-acetylene and 5-(4-methoxybenzyloxy)pentanal, and it was purified by chromatography (0%  $\rightarrow$  100%  $\text{Et}_2\text{O}$ /hexanes), which afforded a yellow oil.

$^1\text{H}$  NMR (600 MHz,  $\text{CDCl}_3$ )  $\delta$  7.24 (d,  $J = 8.5$  Hz, 2H), 6.86 (d,  $J = 8.5$  Hz, 2H), 6.14 (s, 2H), 5.30 (t,  $J = 6.5$  Hz, 1H), 4.42 (s, 2H), 3.76 (s, 9H), 3.74 (s, 3H), 3.45 (t,  $J = 6.2$  Hz, 2H), 1.95–1.82 (m, 2H), 1.70–1.55 (m, 4H), 0.18 (s, 9H).

$^{13}\text{C}$  NMR (150 MHz,  $\text{CDCl}_3$ )  $\delta$  159.3, 158.6, 152.9, 152.8, 130.8, 129.3, 123.7, 113.9, 101.9, 91.5, 72.7, 69.8, 69.8, 69.3, 56.3, 55.7, 55.4, 34.8, 29.4, 21.8, 0.0.

FT-IR (neat) 2956, 2844, 1767, 1616, 1512, 1458, 1251, 1156, 1035, 846  $\text{cm}^{-1}$ .

MS (ESI)  $m/z$  ( $\text{M}+\text{Na}^+$ ) calcd for  $\text{C}_{28}\text{H}_{38}\text{O}_8\text{SiNa}$ : 553.2, found: 553.2.

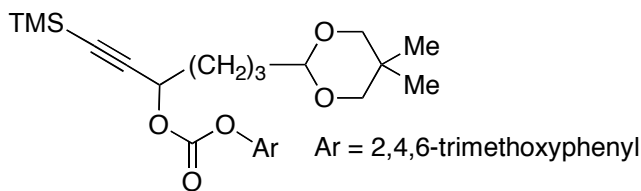

**6-(5,5-Dimethyl-1,3-dioxan-2-yl)-1-(trimethylsilyl)hex-1-yn-3-yl (2,4,6-trimethoxyphenyl) carbonate.** The title compound was synthesized from TMS-acetylene and 4-(5,5-dimethyl-1,3-dioxan-2-yl)butanal, and it was purified by chromatography (0%  $\rightarrow$  100%  $\text{Et}_2\text{O}$ /hexanes), which afforded a colorless oil.

$^1\text{H}$  NMR (600 MHz,  $\text{CDCl}_3$ )  $\delta$  6.13 (s, 2H), 5.27 (t,  $J = 6.5$  Hz, 1H), 4.41 (t,  $J = 4.4$  Hz, 1H), 3.78 (s, 6H), 3.76 (s, 3H), 3.57 (d,  $J = 10.5$  Hz, 2H), 3.39 (d,  $J = 10.8$  Hz, 2H), 1.95–1.81 (m, 2H), 1.70–1.58 (m, 4H), 1.17 (s, 3H), 0.70 (s, 3H), 0.16 (s, 9H).

$^{13}\text{C}$  NMR (150 MHz,  $\text{CDCl}_3$ )  $\delta$  158.2, 152.6, 152.5, 123.5, 101.7, 101.5, 91.3, 77.0, 69.1, 69.0, 56.0, 55.4, 34.6, 34.1, 30.0, 22.9, 21.7, 19.3, -0.2.

FT-IR (neat) 2956, 2845, 2361, 1768, 1618, 1510, 1471, 1252, 1207, 1135, 845  $\text{cm}^{-1}$ .

MS (ESI)  $m/z$  ( $M+Na^+$ ) calcd for  $C_{25}H_{38}O_8SiNa$ : 517.2, found: 517.2.

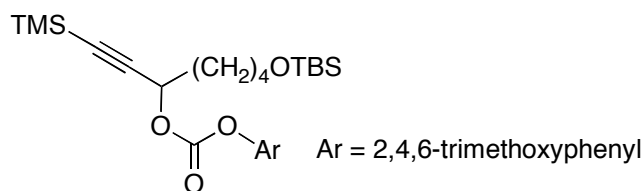

**7-((*Tert*-butyldimethylsilyloxy)-1-(trimethylsilyl)hept-1-yn-3-yl (2,4,6-trimethoxyphenyl) carbonate.** The title compound was synthesized from TMS-acetylene and 5-(*tert*-butyldimethylsilyloxy)pentanal,<sup>2</sup> and it was purified by chromatography (0%→100%  $Et_2O$ /hexanes), which afforded a yellow oil.

$^1H$  NMR (600 MHz,  $CDCl_3$ )  $\delta$  6.13 (s, 2H), 5.28 (t,  $J$  = 6.6 Hz, 1H), 3.77 (s, 6H), 3.75 (s, 3H), 3.62 (t,  $J$  = 5.6 Hz, 2H), 1.91–1.83 (m, 2H), 1.58–1.52 (m, 4H), 0.88 (s, 9H), 0.16 (s, 9H), 0.04 (s, 6H).

$^{13}C$  NMR (150 MHz,  $CDCl_3$ )  $\delta$  158.5, 152.9, 152.8, 123.7, 101.8, 91.6, 91.6, 69.4, 63.0, 56.3, 55.7, 34.7, 32.4, 26.1, 21.5, 18.5, 0.0, –5.0.

FT-IR (neat) 2956, 2858, 2361, 1768, 1617, 1510, 1472, 1252, 1207, 1134, 844  $cm^{-1}$ .

MS (ESI)  $m/z$  ( $M+Na^+$ ) calcd for  $C_{26}H_{44}O_7Si_2Na$ : 547.2, found: 547.2.

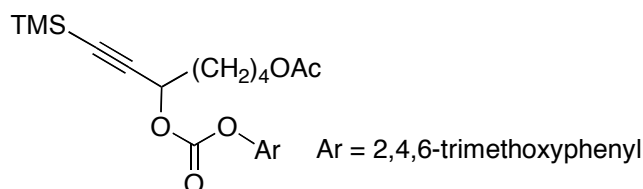

**5-(((2,4,6-Trimethoxyphenoxy)carbonyloxy)-7-(trimethylsilyl)hept-6-yn-1-yl acetate.** The title compound was synthesized from TMS-acetylene and 5-oxopentyl acetate,<sup>3</sup> and it was purified by chromatography (0%→100%  $Et_2O$ /hexanes), which afforded a yellow oil.

$^1H$  NMR (600 MHz,  $CDCl_3$ )  $\delta$  6.14 (s, 2H), 5.32–5.25 (m, 1H), 4.09–4.00 (m, 2H), 3.80–3.73 (m, 9H), 2.04–2.00 (m, 3H), 1.92–1.82 (m, 2H), 1.72–1.62 (m, 2H), 1.62–1.52 (m, 2H), 0.17 (s, 9H).

$^{13}C$  NMR (150 MHz,  $CDCl_3$ )  $\delta$  171.1, 158.6, 152.8, 152.8, 123.6, 101.6, 91.9, 91.6, 69.0, 64.3, 56.2, 55.6, 34.4, 28.2, 21.4, 21.0, –0.1.

FT-IR (neat) 2959, 1768, 1738, 1600, 1510, 1458, 1251, 1207, 1134, 845  $cm^{-1}$ .

MS (ESI)  $m/z$  ( $M+H^+$ ) calcd for  $C_{22}H_{33}O_8Si$ : 453.1, found: 453.1.

(2) Frankowski, K. J.; Golden, J. E.; Zeng, Y.; Lei, Y.; Aube, J. J. *Am. Chem. Soc.* **2008**, *130*, 6018–6024.

(3) Fryszkowska, A.; Ostaszewski, R. J. *Heterocyclic Chem.* **2008**, *45*, 765–772.

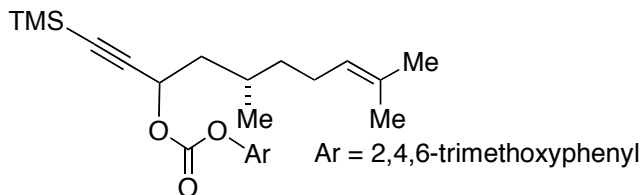

**(5S)-5,9-Dimethyl-1-(trimethylsilyl)dec-8-en-1-yn-3-yl (2,4,6-trimethoxyphenyl) carbonate.**

The title compound was synthesized from TMS-acetylene and (S)-(-)-citronellal, and it was purified by chromatography (0%→100% Et<sub>2</sub>O/hexanes), which afforded a colorless oil.

<sup>1</sup>H NMR (600 MHz, CDCl<sub>3</sub>, mixture of diastereoisomers) δ 6.15 (s, 2H), 5.41–5.32 (m, 1H), 5.13–5.07 (m, 1H), 3.80 (s, 6H), 3.78 (s, 3H), 2.08–1.92 (m, 2H), 1.80–1.70 (m, 1H), 1.68 (s, 3H), 1.60 (s, 3H), 1.45–1.14 (m, 4H), 0.98–0.86 (m, 3H), 0.17 (s, 9H).

<sup>13</sup>C NMR (150 MHz, CDCl<sub>3</sub>, mixture of diastereoisomers) δ 158.5, 152.8, 152.8, 132.6, 131.4, 131.0, 128.9, 124.6, 123.8, 102.3, 102.1, 91.6, 91.4, 68.5, 68.3, 68.1, 56.3, 55.7, 42.2, 41.8, 38.9, 37.1, 37.1, 30.5, 29.3, 29.1, 25.8, 25.5, 25.4, 23.9, 23.1, 19.5, 19.5, 17.8, 14.2, 11.1, 0.0.

MS (ESI) *m/z* (M+H<sup>+</sup>) calcd for C<sub>25</sub>H<sub>39</sub>O<sub>6</sub>Si: 463.2, found: 463.2.

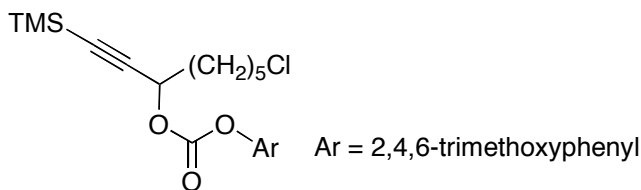

**8-Chloro-1-(trimethylsilyl)oct-1-yn-3-yl (2,4,6-trimethoxyphenyl) carbonate.** The title compound was synthesized from TMS-acetylene and 6-chlorohexanal,<sup>4</sup> and it was purified by chromatography (0%→100% Et<sub>2</sub>O/hexanes), which afforded a yellow oil.

<sup>1</sup>H NMR (600 MHz, CDCl<sub>3</sub>) δ 6.15 (s, 2H), 5.30 (t, *J* = 6.4 Hz, 1H), 3.79 (s, 6H), 3.77 (s, 3H), 3.53 (t, *J* = 6.7 Hz, 2H), 1.89–1.84 (m, 2H), 1.82–1.75 (m, 2H), 1.56–1.46 (m, 4H), 0.17 (s, 9H).

<sup>13</sup>C NMR (150 MHz, CDCl<sub>3</sub>) δ 158.6, 152.9, 152.8, 123.7, 101.7, 91.8, 91.6, 69.2, 56.2, 55.7, 44.9, 34.7, 32.5, 26.4, 24.2, 0.0.

FT-IR (neat) 2957, 1768, 1600, 1510, 1458, 1251, 1207, 1134, 845 cm<sup>-1</sup>.

MS (ESI) *m/z* (M+Na<sup>+</sup>) calcd for C<sub>21</sub>H<sub>31</sub>ClO<sub>6</sub>SiNa: 465.2, found: 465.2.

(4) Fox, R. J.; Lalic, G.; Bergman, R. G. *J. Am. Chem. Soc.* **2007**, *129*, 14144–14145.

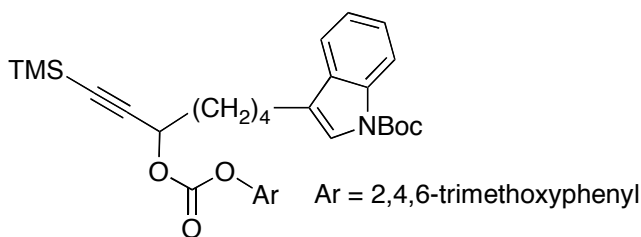

**Tert-butyl 3-(5-(((2,4,6-trimethoxyphenoxy)carbonyl)oxy)-7-(trimethylsilyl)hept-6-yn-1-yl)-1H-indole-1-carboxylate.** The title compound was synthesized from TMS-acetylene and 3-(5-oxo-pentyl)-indole-1-carboxylic acid *tert*-butyl ester,<sup>5</sup> and it was purified by chromatography (0%→100% Et<sub>2</sub>O/hexanes), which afforded a yellow oil.

<sup>1</sup>H NMR (600 MHz, CDCl<sub>3</sub>) δ 8.18 (br s, 1H), 7.56 (d, *J* = 7.7 Hz, 1H), 7.41 (br s, 1H), 7.34 (t, *J* = 7.7 Hz, 1H), 7.27 (t, *J* = 7.5 Hz, 1H), 6.20 (s, 2H), 5.38 (t, *J* = 6.5 Hz, 1H), 3.83 (s, 6H), 3.81 (s, 3H), 2.76 (t, *J* = 7.6 Hz, 2H), 2.05–1.92 (m, 2H), 1.87–1.80 (m, 2H), 1.71 (br s, 11H), 0.22 (s, 9H).

<sup>13</sup>C NMR (150 MHz, CDCl<sub>3</sub>) δ 158.2, 152.5, 152.4, 149.6, 135.4, 130.5, 124.0, 123.3, 122.0, 120.7, 118.8, 115.0, 101.5, 91.4, 91.2, 91.0, 83.0, 69.0, 65.6, 55.9, 55.3, 34.4, 28.5, 28.0, 24.6, –0.4.

FT-IR (neat) 2940, 1767, 1731, 1600, 1511, 1456, 1378, 1253, 1157, 1134, 846, 766 cm<sup>-1</sup>.

MS (ESI) *m/z* (M+Na<sup>+</sup>) calcd for C<sub>33</sub>H<sub>43</sub>NO<sub>8</sub>SiNa: 632.2, found: 632.2.

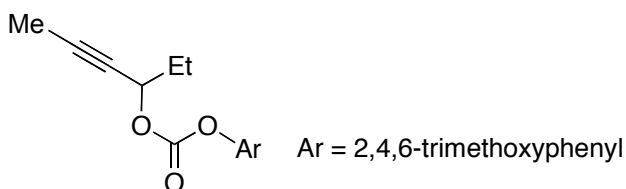

**Hex-4-yn-3-yl (2,4,6-trimethoxyphenyl) carbonate.** The title compound was synthesized from 4-hexyn-3-ol, and it was purified by chromatography (0%→100% Et<sub>2</sub>O/hexanes), which afforded a colorless oil.

<sup>1</sup>H NMR (600 MHz, CDCl<sub>3</sub>) δ 6.08 (s, 2H), 5.18–5.13 (m, 1H), 3.71 (s, 6H), 3.68 (s, 3H), 1.80–1.78 (m, 5H), 0.99 (t, *J* = 7.4 Hz, 3H).

<sup>13</sup>C NMR (150 MHz, CDCl<sub>3</sub>) δ 158.5, 153.0, 152.8, 123.6, 91.4, 83.0, 75.9, 70.6, 56.1, 55.5, 28.5, 9.2, 3.5.

FT-IR (neat) 2973, 2362, 1768, 1617, 1508, 1457, 1206, 1132, 1035, 949, 812 cm<sup>-1</sup>.

MS (ESI) *m/z* (M+H<sup>+</sup>) calcd for C<sub>16</sub>H<sub>21</sub>O<sub>6</sub>: 309.1, found: 309.1.

(5) Conrad, J. C.; Kong, J.; Laforteza, B. N.; MacMillan, D. W. C. *J. Am. Chem. Soc.* **2009**, *131*, 11640–11641.

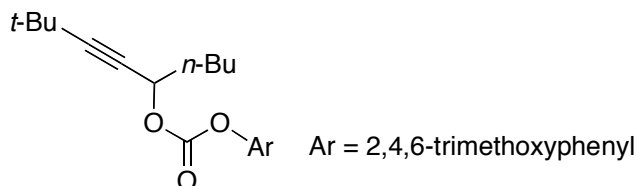

**2,2-Dimethylnon-3-yn-5-yl (2,4,6-trimethoxyphenyl) carbonate.** The title compound was synthesized from *tert*-butylacetylene and valeraldehyde, and it was purified by chromatography (0%→100% Et<sub>2</sub>O/hexanes), which afforded a colorless solid.

<sup>1</sup>H NMR (600 MHz, CDCl<sub>3</sub>) δ 6.16 (s, 2H), 5.30 (t, *J* = 6.5 Hz, 1H), 3.80 (s, 6H), 3.77 (s, 3H), 1.91–1.78 (m, 2H), 1.53–1.44 (m, 2H), 1.43–1.32 (m, 2H), 1.23 (s, 9H), 0.94 (t, *J* = 7.3 Hz, 3H).

<sup>13</sup>C NMR (100 MHz, CDCl<sub>3</sub>) δ 158.5, 153.0, 152.8, 123.6, 95.4, 91.4, 75.5, 69.7, 56.2, 55.6, 35.0, 30.9, 27.5, 27.1, 22.3, 14.1.

FT-IR (neat) 2967, 2361, 2339, 1838, 1767, 1617, 1509, 1457, 1252, 1206, 1134, 1036, 950, 812 cm<sup>-1</sup>.

MS (ESI) *m/z* (M+H<sup>+</sup>) calcd for C<sub>21</sub>H<sub>31</sub>O<sub>6</sub>: 379.2, found: 379.3.

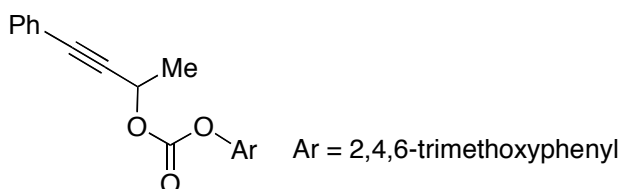

**4-Phenylbut-3-yn-2-yl (2,4,6-trimethoxyphenyl) carbonate.** The title compound was synthesized from phenylacetylene and acetaldehyde, and it was purified by chromatography (0%→100% Et<sub>2</sub>O/hexanes), which afforded a colorless solid.

<sup>1</sup>H NMR (600 MHz, CDCl<sub>3</sub>) δ 7.49 (d, *J* = 6.2 Hz, 2H), 7.36–7.32 (m, 3H), 6.20 (s, 2H), 5.65 (q, *J* = 6.6 Hz, 1H), 3.84 (s, 6H), 3.82 (s, 3H), 1.74 (d, *J* = 6.7 Hz, 3H).

<sup>13</sup>C NMR (150 MHz, CDCl<sub>3</sub>) δ 158.6, 152.9, 152.8, 132.0, 128.8, 128.4, 123.8, 122.5, 91.6, 86.8, 85.7, 65.9, 56.3, 55.7, 21.6.

FT-IR (neat) 2941, 1765, 1600, 1510, 1457, 1250, 1206, 1132, 1088, 1034, 759 cm<sup>-1</sup>.

MS (ESI) *m/z* (M+H<sup>+</sup>) calcd for C<sub>20</sub>H<sub>21</sub>O<sub>6</sub>: 357.1, found: 357.1.

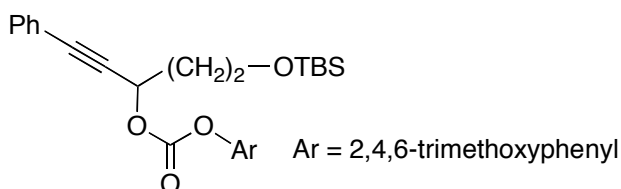

**5-((*Tert*-butyldimethylsilyl)oxy)-1-phenylpent-1-yn-3-yl (2,4,6-trimethoxyphenyl) carbonate.** The title compound was synthesized from TMS-acetylene and 3-(*tert*-



butyldimethylsilyloxy)propanal,<sup>6</sup> and it was purified by chromatography (0%→100% Et<sub>2</sub>O/hexanes), which afforded a yellow oil.

<sup>1</sup>H NMR (600 MHz, CDCl<sub>3</sub>) δ 7.49–7.46 (m, 2H), 7.35–7.31 (m, 3H), 6.18 (s, 2H), 5.75 (t, *J* = 6.9 Hz, 1H), 3.91 (t, *J* = 6.0 Hz, 2H), 3.80 (s, 6H), 3.78 (s, 3H), 2.34–2.26 (m, 1H), 2.21–2.14 (m, 1H), 0.95 (s, 9H), 0.13 (s, 6H).

<sup>13</sup>C NMR (150 MHz, CDCl<sub>3</sub>) δ 158.6, 152.8, 132.0, 131.9, 128.9, 128.4, 123.7, 122.4, 91.5, 86.6, 85.9, 66.9, 58.9, 56.3, 55.7, 38.1, 26.1, 18.4, –5.2.

FT-IR (neat) 2955, 2856, 2361, 1770, 1600, 1510, 1471, 1253, 1207, 1134, 835, 778 cm<sup>-1</sup>.

MS (ESI) *m/z* (M+H<sup>+</sup>) calcd for C<sub>27</sub>H<sub>37</sub>O<sub>7</sub>Si: 501.2, found: 501.2.

### III. Stereoconvergent Cross-Coupling Reactions

**General procedure for the preparation of the organozinc reagents:** A solution of the aryl bromide (10 mmol) in THF (10 mL) was prepared. A portion (2.0 mL) of this solution was added to magnesium powder (0.27 g, 12 mmol) in one portion. The suspension was vigorously stirred, and the temperature was monitored until it reached reflux (heating with a heat gun or cooling in a water bath, as required). The remaining aryl bromide solution was added to the reaction mixture over ~10 min, and stirring was continued at r.t. for 20 min. The suspension was filtered through an acrodisc, and then the solution was titrated using Knochel's method (~1.0 M).<sup>7</sup>

In a glovebox, a solution of the Grignard reagent (3.0 mL, 3.0 mmol) was added to a suspension of zinc iodide (1.0 g, 3.1 mmol) in THF (7.0 mL) in a 20-mL vial. The vial was capped and taken out of the glovebox, and the resulting suspension was stirred at r.t. for 30 min and then used directly in the cross-coupling reaction.

**General cross-coupling procedure:** DME (3.75 mL) was added to a 20-mL vial charged with the propargylic carbonate (0.75 mmol), (3*S*,8*R*)-pybox ligand L\* (the enantiomer illustrated in eq 1; 39 mg, 0.098 mmol), and NiCl<sub>2</sub>(PCy<sub>3</sub>)<sub>2</sub> (53 mg, 0.076 mmol) under argon. The resulting suspension was cooled to 10 °C, and then the suspension that contained the organozinc reagent (3.75 mL, 1.5 mmol) was added in one portion. The reaction mixture was stirred vigorously at 10 °C for 20 h, during which the initially colorless suspension turned into a dark-red solution, from which a precipitate formed during the course of the reaction. The reaction was quenched by the addition of ethanol (0.75 mL). Next, the mixture was allowed to warm to r.t., diluted with diethyl ether/hexane (1:1; 5 mL), and filtered through a short plug of silica, eluting with diethyl ether/hexane (1:1; 20 mL). The solvent was removed in vacuo, and the residue was purified by reverse-phase flash chromatography (5→100% MeCN in water, Biotage 10-g SNAP cartridge).

A second run was performed with the (3*R*,8*S*) enantiomer of ligand L\*.

---

(6) Marshall, J. A.; Van Devender, E. A. *J. Org. Chem.* **2001**, *66*, 8037–8041.

(7) Krasovskiy, A.; Knochel, P. *Synthesis* **2006**, 890–891.

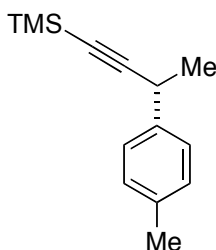

**(R)-Trimethyl(3-(*p*-tolyl)but-1-yn-1-yl)silane (Table 2, entry 1).** 2,4,6-Trimethoxyphenyl (4-(trimethylsilyl)but-3-yn-2-yl) carbonate (264 mg, 0.75 mmol) and *p*-tolylzinc iodide (0.30 M solution in THF; 3.75 mL, 1.13 mmol) were used. The product was obtained as a colorless oil. First run: 117 mg (72%, 92% ee). Second run (using (3*S*,8*R*)-1): 105 mg (65%, 94% ee).

The ee was determined by GC on a Chirasil Dex-CB column (75→160 °C @ 0.25 °C/min, then →170 °C @ 10 °C/min, hold 10 min; flow rate 1.0 mL/min) with  $t_r$  = 77.5 min (major), 78.6 min (minor).

$^1\text{H NMR}$  (600 MHz,  $\text{CDCl}_3$ )  $\delta$  7.32 (d,  $J$  = 7.9 Hz, 2H), 7.18 (d,  $J$  = 7.9 Hz, 2H), 3.80 (q,  $J$  = 7.1 Hz, 1H), 2.38 (s, 3H), 1.52 (d,  $J$  = 7.2 Hz, 3H), 0.23 (s, 9H).

$^{13}\text{C NMR}$  (150 MHz,  $\text{CDCl}_3$ )  $\delta$  140.3, 136.3, 129.3, 126.9, 110.0, 86.1, 32.6, 24.8, 21.2, 0.4.

FT-IR (neat) 2961, 2166, 1513, 1250, 1095, 917, 843  $\text{cm}^{-1}$ .

MS (ESI)  $m/z$  ( $\text{M}-2\text{H}+\text{H}^+$ ) calcd for  $\text{C}_{14}\text{H}_{19}\text{Si}$ : 215.1, found: 215.1.

$[\alpha]_{\text{D}}^{23} = -6.1$  (c 0.30,  $\text{CHCl}_3$ ).

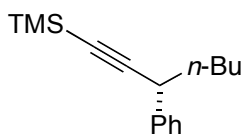

**(R)-Trimethyl(3-phenylhept-1-yn-1-yl)silane (Table 2, entry 2).** 2,4,6-Trimethoxyphenyl (1-(trimethylsilyl)hept-1-yn-3-yl) carbonate (200 mg, 0.50 mmol) and phenylzinc iodide (0.30 M solution in THF; 2.5 mL, 0.75 mmol) were used. The product was obtained as pale-yellow oil. First run: 97 mg (80%, 90% ee). Second run (0.75 mmol): 150 mg (82%, 90% ee).

The ee was determined by GC on a Chirasil Dex-CB column (100→130 °C @ 10 °C/min, hold 10 min, then →170 °C @ 9 °C/min, hold 5 min; flow rate 1.0 mL/min) with  $t_r$  = 13.2 min (minor), 13.3 min (major).

$^1\text{H NMR}$  (600 MHz,  $\text{CDCl}_3$ )  $\delta$  7.37–7.31 (m, 4H), 7.26–7.22 (m, 1H), 3.66–3.63 (m, 1H), 1.79–1.68 (m, 2H), 1.49–1.25 (m, 4H), 0.90 (t,  $J$  = 7.2 Hz, 3H), 0.20 (s, 9H).

$^{13}\text{C NMR}$  (150 MHz,  $\text{CDCl}_3$ )  $\delta$  142.1, 128.4, 127.4, 126.5, 108.6, 87.0, 38.8, 38.4, 29.4, 22.4, 14.0, 0.2.

FT-IR (neat) 2959, 2934, 2172, 1453, 1249, 843, 759, 698  $\text{cm}^{-1}$ .

MS (ESI)  $m/z$  ( $\text{M}+\text{H}^+$ ) calcd for  $\text{C}_{16}\text{H}_{25}\text{Si}$ : 245.2, found: 245.1.

$[\alpha]_{\text{D}}^{23} = -11$  (c 0.50,  $\text{CHCl}_3$ , (S)-enantiomer).

The absolute configuration of the product was assigned by comparison with literature data.<sup>8</sup>

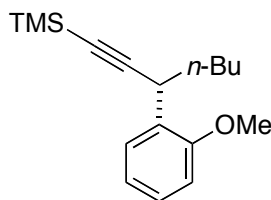

**(R)-3-(2-Methoxyphenyl)hept-1-yn-1-yl)trimethylsilane (Table 2, entry 3).** 2,4,6-Trimethoxyphenyl (1-(trimethylsilyl)hept-1-yn-3-yl) carbonate (300 mg, 0.75 mmol) and *o*-methoxyphenylzinc iodide (0.30 M solution in THF; 3.75 mL, 1.13 mmol) were used. The product was obtained as pale-yellow oil. First run: 133 mg (65%, 92% ee). Second run: 134 mg (66%, 93% ee).

The ee was determined by HPLC on an OD-H column (hexanes, 0.9 mL/min) with  $t_r$  = 4.7 min (major), 5.0 min (minor).

<sup>1</sup>H NMR (600 MHz, CDCl<sub>3</sub>)  $\delta$  7.59 (dd,  $J$  = 7.5, 1.5 Hz, 1H), 7.25 (dt,  $J$  = 8.2, 1.6 Hz, 1H), 7.01 (t,  $J$  = 7.4 Hz, 1H), 6.88 (d,  $J$  = 8.1 Hz, 1H), 4.17 (dd,  $J$  = 8.7, 5.3 Hz, 1H), 3.86 (s, 3H), 1.80–1.72 (m, 1H), 1.70–1.62 (m, 1H), 1.54–1.31 (m, 4H), 0.95 (t,  $J$  = 7.3 Hz, 3H), 0.24 (s, 9H).

<sup>13</sup>C NMR (150 MHz, CDCl<sub>3</sub>)  $\delta$  156.3, 130.7, 128.7, 127.7, 120.7, 110.5, 109.5, 86.3, 55.5, 36.6, 32.1, 29.6, 22.5, 14.2, 0.5.

FT-IR (neat) 2958, 2169, 1601, 1493, 1465, 1246, 1051, 1032, 842 cm<sup>-1</sup>.

MS (ESI)  $m/z$  (M+Na<sup>+</sup>) calcd for C<sub>17</sub>H<sub>26</sub>OSiNa: 297.2, found: 297.2.

$[\alpha]_D^{23}$  = +20 (c 0.68, CHCl<sub>3</sub>).

The absolute configuration of the product was assigned by comparison with literature data.<sup>8</sup>

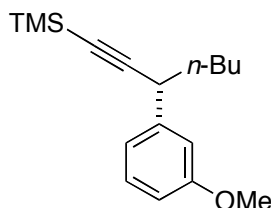

**(R)-3-(3-Methoxyphenyl)hept-1-yn-1-yl)trimethylsilane (Table 2, entry 4).** 2,4,6-Trimethoxyphenyl (1-(trimethylsilyl)hept-1-yn-3-yl) carbonate (300 mg, 0.75 mmol) and *m*-methoxyphenylzinc iodide (0.30 M solution in THF; 3.75 mL, 1.13 mmol) were used. The product was obtained as a yellow oil. First run: 147 mg (72%, 92% ee). Second run: 151 mg (74%, 91% ee).

The ee was determined by HPLC on an OD-H column (hexanes, 0.9 mL/min) with  $t_r$  = 7.0 min (minor), 8.8 min (major).

(8) Smith, S. W.; Fu, G. C. *J. Am. Chem. Soc.* **2008**, *130*, 12645–12647.

$^1\text{H}$  NMR (600 MHz,  $\text{CDCl}_3$ )  $\delta$  7.76 (t,  $J = 7.9$  Hz, 1H), 7.48 (s, 1H), 7.45 (d,  $J = 7.7$  Hz, 1H), 7.30 (d,  $J = 8.2$  Hz, 1H), 4.34 (s, 3H), 4.15 (t,  $J = 7.2$  Hz, 1H), 2.30–2.22 (m, 2H), 2.02–1.80 (m, 4H), 1.43 (t,  $J = 7.3$  Hz, 3H), 0.72 (s, 9H).

$^{13}\text{C}$  NMR (150 MHz,  $\text{CDCl}_3$ )  $\delta$  159.3, 143.3, 128.9, 119.5, 112.8, 111.6, 108.2, 86.8, 54.8, 38.4, 37.9, 29.1, 22.0, 13.6,  $-0.1$ .

FT-IR (neat) 2958, 2860, 2171, 1601, 1487, 1466, 1437, 1250, 1153, 1046, 843  $\text{cm}^{-1}$ .

MS (ESI)  $m/z$  ( $\text{M}+\text{Na}^+$ ) calcd for  $\text{C}_{17}\text{H}_{26}\text{OSiNa}$ : 297.2, found: 297.2.

$[\alpha]_{\text{D}}^{23} = +16$  (c 0.67,  $\text{CHCl}_3$ ).

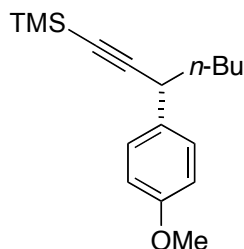

**(R)-3-(4-Methoxyphenyl)hept-1-yn-1-yltrimethylsilane** (Table 2, entry 5). 2,4,6-Trimethoxyphenyl (1-(trimethylsilyl)hept-1-yn-3-yl) carbonate (300 mg, 0.75 mmol) and *p*-methoxyphenylzinc iodide (0.30 M solution in THF; 3.75 mL, 1.13 mmol) were used. The product was obtained as a yellow oil. First run: 148 mg (73%, 89% ee). Second run: 159 mg (78%, 88% ee).

The ee was determined by HPLC on an OD-H column (hexanes, 0.9 mL/min) with  $t_r = 6.0$  min (minor), 6.6 min (major).

$^1\text{H}$  NMR (600 MHz,  $\text{CDCl}_3$ )  $\delta$  7.24 (d,  $J = 8.3$  Hz, 2H), 6.84 (d,  $J = 6.9$  Hz, 2H), 3.79 (s, 3H), 3.57 (t,  $J = 6.4$  Hz, 1H), 1.74–1.61 (m, 2H), 1.45–1.22 (m, 4H), 0.89–0.84 (m, 3H), 0.16 (s, 9H).

$^{13}\text{C}$  NMR (150 MHz,  $\text{CDCl}_3$ )  $\delta$  157.9, 133.8, 128.0, 113.4, 108.6, 86.4, 54.9, 38.1, 37.5, 29.0, 22.0, 13.6,  $-0.1$ .

FT-IR (neat) 2958, 2361, 2171, 1512, 1249, 1176, 1039, 842  $\text{cm}^{-1}$ .

MS (ESI)  $m/z$  ( $\text{M}+\text{H}^+$ ) calcd for  $\text{C}_{17}\text{H}_{27}\text{OSi}$ : 275.2, found: 275.2.

$[\alpha]_{\text{D}}^{23} = +4.7$  (c 0.48,  $\text{CHCl}_3$ ).

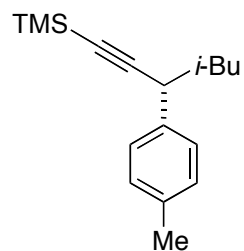

**(R)-Trimethyl(5-methyl-3-(*p*-tolyl)hex-1-yn-1-yl)silane** (Table 2, entry 6). 5-Methyl-1-(trimethylsilyl)hex-1-yn-3-yl (2,4,6-trimethoxyphenyl) carbonate (300 mg, 0.75 mmol) and *p*-

tolylzinc iodide (0.30 M solution in THF; 3.75 mL, 1.13 mmol) were used. The product was obtained as a colorless oil. First run: 111 mg (58%, 94% ee). Second run: 108 mg (56%, 92% ee).

The ee was determined by GC on a Chirasil Dex-CB column (100→130 °C @ 10 °C/min, hold 10 min, then →170 °C @ 9 °C/min, hold 5 min; flow rate 1.0 mL/min) with  $t_r$  = 15.9 min (minor), 16.0 min (major).

$^1\text{H}$  NMR (600 MHz,  $\text{CDCl}_3$ )  $\delta$  7.26 (d,  $J$  = 8.9 Hz, 2H), 7.15 (d,  $J$  = 7.9 Hz, 2H), 3.67 (dd,  $J$  = 9.3, 6.5 Hz, 1H), 2.36 (s, 3H), 1.83–1.75 (m, 1H), 1.70 (ddd,  $J$  = 13.3, 9.4, 5.8 Hz, 1H), 1.52–1.46 (m, 1H), 0.97 (d,  $J$  = 2.7 Hz, 3H), 0.95 (d,  $J$  = 2.8 Hz, 3H), 0.20 (s, 9H).

$^{13}\text{C}$  NMR (150 MHz,  $\text{CDCl}_3$ )  $\delta$  139.4, 136.0, 129.1, 127.3, 108.9, 86.5, 48.1, 36.4, 25.9, 22.9, 21.9, 20.9, 0.2.

FT-IR (neat) 2958, 2170, 1735, 1513, 1250, 842  $\text{cm}^{-1}$ .

MS (ESI)  $m/z$  ( $\text{M}+\text{H}^+$ ) calcd for  $\text{C}_{17}\text{H}_{27}\text{Si}$ : 259.2, found: 259.2.

$[\alpha]_{\text{D}}^{23} = +1.7$  (c 0.63,  $\text{CHCl}_3$ ).

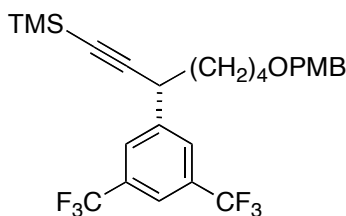

**(R)-3-(3,5-Bis(trifluoromethyl)phenyl)-7-((4-methoxybenzyl)oxy)hept-1-yn-1-yl)trimethylsilane (Table 2, entry 7).** 7-((4-Methoxybenzyl)oxy)-1-(trimethylsilyl)hept-1-yn-3-yl (2,4,6-trimethoxyphenyl) carbonate (398 mg, 0.75 mmol) and 3,5-*bis*(trifluoromethyl)phenylzinc iodide (0.30 M solution in THF; 3.75 mL, 1.13 mmol) were used. The product was obtained as a colorless oil. First run: 313 mg (81%, 84% ee). Second run: 342 mg (88%, 86% ee).

The ee was determined by HPLC on an OD-H column (1% IPA in hexanes, 0.9 mL/min) with  $t_r$  = 4.3 min (major), 4.7 min (minor).

$^1\text{H}$  NMR (600 MHz,  $\text{CDCl}_3$ )  $\delta$  7.85 (s, 2H), 7.79 (s, 1H), 7.28 (d,  $J$  = 8.7 Hz, 2H), 6.91 (d,  $J$  = 8.5 Hz, 2H), 4.46 (s, 2H), 3.83 (s, 3H), 3.82–3.77 (m, 1H), 3.48 (t,  $J$  = 6.4 Hz, 2H), 1.83–1.74 (m, 2H), 1.73–1.48 (m, 4H), 0.23 (s, 9H).

$^{13}\text{C}$  NMR (150 MHz,  $\text{CDCl}_3$ )  $\delta$  159.3, 144.7, 131.9 ( $q$ ,  $^2J_{\text{CF}} = 33$  Hz), 130.7, 129.4, 127.9, 123.6 ( $q$ ,  $^1J_{\text{CF}} = 273$  Hz), 121.0, 113.9, 106.1, 89.7, 72.7, 69.8, 55.4, 38.7, 38.3, 29.4, 24.2, 0.1.

FT-IR (neat) 2955, 2859, 2174, 1616, 1514, 1376, 1280, 1251, 1173, 1137, 845  $\text{cm}^{-1}$ .

MS (ESI)  $m/z$  ( $\text{M}-2\text{H}+\text{Na}^+$ ) calcd for  $\text{C}_{26}\text{H}_{28}\text{F}_6\text{O}_2\text{SiNa}$ : 537.2, found: 537.3.

$[\alpha]_{\text{D}}^{23} = +12$  (c 0.55,  $\text{CHCl}_3$ ).

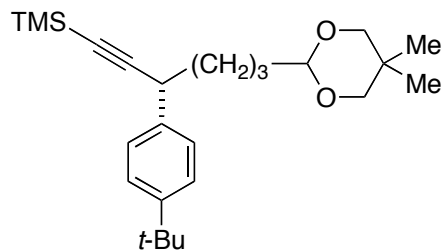

**(R)-3-(4-(Tert-butyl)phenyl)-6-(5,5-dimethyl-1,3-dioxan-2-yl)hex-1-yn-1-yltrimethylsilane (Table 2, entry 8).** 6-(5,5-Dimethyl-1,3-dioxan-2-yl)-1-(trimethylsilyl)hex-1-yn-3-yl (2,4,6-trimethoxyphenyl) carbonate (371 mg, 0.75 mmol) and *p*-tert-butylphenylzinc iodide (0.30 M solution in THF; 3.75 mL, 1.13 mmol) were used. The product was obtained as a colorless oil. First run: 264 mg (88%, 91% ee). Second run: 259 mg (86%, 92% ee).

The ee was determined by HPLC on an OD-H column (0.3% IPA in hexanes, 0.9 mL/min) with  $t_r$  = 8.7 min (minor), 10.9 min (major).

$^1\text{H}$  NMR (600 MHz,  $\text{CDCl}_3$ )  $\delta$  7.35 (d,  $J$  = 8.2 Hz, 2H), 7.30–7.27 (m, 2H), 4.43 (t,  $J$  = 4.7 Hz, 1H), 3.66–3.60 (m, 3H), 3.44 (d,  $J$  = 11.0 Hz, 2H), 1.81–1.74 (m, 2H), 1.72–1.61 (m, 3H), 1.59–1.51 (m, 1H), 1.34 (s, 9H), 1.21 (s, 3H), 0.74 (s, 3H), 0.21 (s, 9H).

$^{13}\text{C}$  NMR (150 MHz,  $\text{CDCl}_3$ )  $\delta$  149.5, 138.9, 127.2, 125.4, 108.7, 102.3, 87.2, 38.7, 38.4, 34.7, 34.6, 31.5, 30.3, 23.1, 22.1, 22.0, 0.4.

FT-IR (neat) 2957, 2868, 2171, 1508, 1463, 1394, 1363, 1249, 1134, 843  $\text{cm}^{-1}$ .

MS (ESI)  $m/z$  ( $\text{M}+\text{H}^+$ ) calcd for  $\text{C}_{25}\text{H}_{41}\text{O}_2\text{Si}$ : 401.2, found: 401.2.

$[\alpha]_D^{23}$  = +10 (c 0.51,  $\text{CHCl}_3$ ).

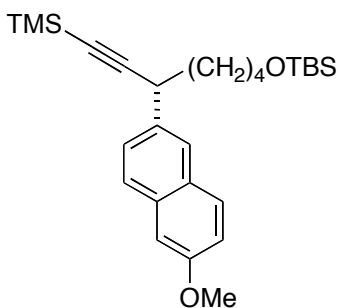

**(R)-Tert-butyl((5-(6-methoxynaphthalen-2-yl)-7-(trimethylsilyl)hept-6-yn-1-yl)oxy)dimethylsilane (Table 2, entry 9).** 7-((Tert-butyl)dimethylsilyl)oxy-1-(trimethylsilyl)hept-1-yn-3-yl (2,4,6-trimethoxyphenyl) carbonate (393 mg, 0.75 mmol) and 6-methoxynaphthylzinc iodide (0.30 M solution in THF; 3.75 mL, 1.13 mmol) were used. The product was obtained as a colorless oil. First run: 324 mg (95%, 88% ee). Second run: 317 mg (93%, 94% ee).

The ee was determined by HPLC on an IB column (hexanes, 0.9 mL/min) with  $t_r$  = 18.8 min (major), 20.4 min (minor).

$^1\text{H}$  NMR (600 MHz,  $\text{CDCl}_3$ )  $\delta$  7.77–7.73 (m, 3H), 7.49 (d,  $J$  = 8.5 Hz, 1H), 7.19 (d,  $J$  = 8.8 Hz, 1H), 7.15 (s, 1H), 3.95 (s, 3H), 3.83 (t,  $J$  = 7.2 Hz, 1H), 3.64 (t,  $J$  = 6.1 Hz, 2H), 1.92–1.82 (m, 2H), 1.62–1.45 (m, 3H), 1.35–1.26 (m, 1H), 0.93 (s, 9H), 0.26 (s, 6H), 0.09 (s, 9H).

$^{13}\text{C}$  NMR (150 MHz,  $\text{CDCl}_3$ )  $\delta$  157.6, 137.2, 133.7, 129.4, 129.1, 127.1, 126.5, 126.0, 119.0, 108.8, 105.8, 87.4, 63.3, 55.4, 38.9, 38.5, 32.7, 26.2, 23.9, 18.5, 0.4,  $-5.0$ .

FT-IR (neat) 2955, 2361, 2170, 1607, 1507, 1390, 1250, 1105, 1035, 841, 775  $\text{cm}^{-1}$ .

MS (ESI)  $m/z$  ( $\text{M}+\text{H}^+$ ) calcd for  $\text{C}_{27}\text{H}_{43}\text{O}_2\text{Si}_2$ : 455.3, found: 455.3.

$[\alpha]_{\text{D}}^{23} = -8.6$  (c 0.51,  $\text{CHCl}_3$ ).

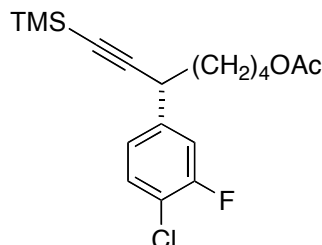

**(R)-5-(4-Chloro-3-fluorophenyl)-7-(trimethylsilyl)hept-6-yn-1-yl acetate (Table 2, entry 10).**

5-(((2,4,6-Trimethoxyphenoxy)carbonyloxy)-7-(trimethylsilyl)hept-6-yn-1-yl acetate (340 mg, 0.75 mmol) and 4-chloro-3-fluorophenylzinc iodide (0.30 M solution in THF; 3.75 mL, 1.13 mmol) were used. The product was obtained as a colorless oil. First run: 204 mg (77%, 87% ee). Second run: 226 mg (85%, 85% ee).

The ee was determined by HPLC on an OD-H column (hexanes, 0.9 mL/min) with  $t_r = 25.8$  min (major), 29.2 min (minor).

$^1\text{H}$  NMR (600 MHz,  $\text{CDCl}_3$ )  $\delta$  7.32 (t,  $J = 7.8$  Hz, 1H), 7.15 (d,  $J = 10.1$  Hz, 1H), 7.04 (d,  $J = 8.3$  Hz, 1H), 4.04 (t,  $J = 6.7$  Hz, 2H), 3.62 (t,  $J = 7.2$  Hz, 1H), 2.03 (s, 3H), 1.75–1.57 (m, 4H), 1.54–1.36 (m, 2H), 0.18 (s, 9H).

$^{13}\text{C}$  NMR (150 MHz,  $\text{CDCl}_3$ )  $\delta$  171.4, 158.2 (d,  $^1J_{\text{CF}} = 250$  Hz), 142.8 (d,  $^3J_{\text{CF}} = 6$  Hz), 130.6, 124.0, 119.3 (d,  $^2J_{\text{CF}} = 17$  Hz), 115.9 (d,  $^2J_{\text{CF}} = 22$  Hz), 106.7, 88.6, 64.4, 38.1, 37.9, 28.3, 23.7, 21.2, 0.3.

FT-IR (neat) 2957, 2351, 2172, 1740, 1487, 1424, 1249, 1062, 843, 760  $\text{cm}^{-1}$ .

MS (ESI)  $m/z$  ( $\text{M}-\text{Ac}+\text{H}+\text{H}^+$ ) calcd for  $\text{C}_{16}\text{H}_{23}\text{ClFOSi}$ : 313.1, found: 313.1.

$[\alpha]_{\text{D}}^{23} = +10$  (c 0.55,  $\text{CHCl}_3$ ).

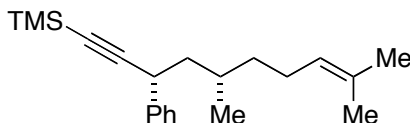

**((3R,5S)-5,9-Dimethyl-3-phenyldec-8-en-1-yn-1-yl)trimethylsilane (Table 2, entry 11).**

(5S)-5,9-Dimethyl-1-(trimethylsilyl)dec-8-en-1-yn-3-yl (2,4,6-trimethoxyphenyl) carbonate (349 mg, 0.75 mmol) and phenylzinc iodide (0.30 M solution in THF; 3.75 mL, 1.13 mmol) were used. The product was obtained as a colorless oil. First run: 190 mg (81%, 90% de). Second run: 177 mg (76%, 88% de).

The de was determined by GC on an HP-5 column (120  $^{\circ}\text{C}$  for 1 min, then 120 $\rightarrow$ 280  $^{\circ}\text{C}$  @ 10  $^{\circ}\text{C}/\text{min}$ , hold 2 min; flow rate 1.0 mL/min) with  $t_r = 9.3$  min (minor), 9.4 min (major).

$^1\text{H}$  NMR (600 MHz,  $\text{CDCl}_3$ )  $\delta$  7.28–7.21 (m, 3H), 7.18–7.11 (m, 2H), 5.04–5.00 (m, 1H), 3.64–3.60 (m, 1H), 1.93–1.87 (m, 1H), 1.70–1.64 (m, 1H), 1.60 (s, 3H), 1.52 (s, 3H), 1.37–1.20 (m, 3H), 1.16–1.09 (m, 1H), 0.88 (d,  $J = 6.5$  Hz, 3H), 0.86–0.79 (m, 1H), 0.09 (s, 9H).

$^{13}\text{C}$  NMR (150 MHz,  $\text{CDCl}_3$ )  $\delta$  142.7, 131.4, 128.6, 127.5, 126.7, 124.9, 108.5, 87.3, 46.7, 37.5, 36.9, 30.6, 26.0, 25.5, 19.3, 17.9, 0.4.

FT-IR (neat) 2961, 2927, 2361, 2171, 1466, 1250, 842  $\text{cm}^{-1}$ .

MS (ESI)  $m/z$  ( $\text{M}+\text{H}^+$ ) calcd for  $\text{C}_{21}\text{H}_{33}\text{Si}$ : 313.2, found: 313.2.

$[\alpha]_{\text{D}}^{23} = +6.7$  (c 0.60,  $\text{CHCl}_3$ ).

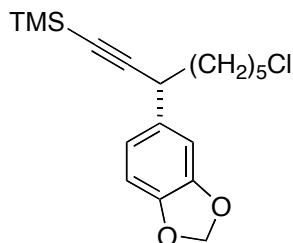

**(R)-3-(Benzo[d][1,3]dioxol-5-yl)-8-chlorooct-1-yn-1-yltrimethylsilane (Table 2, entry 12).**

8-Chloro-1-(trimethylsilyl)oct-1-yn-3-yl (2,4,6-trimethoxyphenyl) carbonate (332 mg, 0.75 mmol) and 3,4-methylenedioxophenylzinc iodide (0.30 M solution in THF; 3.75 mL, 1.13 mmol) were used. The product was obtained as a colorless oil. First run: 157 mg (65%, 83% ee). Second run: 157 mg (65%, 85% ee).

The ee was determined by HPLC on an OD-H column (hexanes, 0.9 mL/min) with  $t_r = 19.1$  min (major), 23.7 min (minor).

$^1\text{H}$  NMR (600 MHz,  $\text{CDCl}_3$ )  $\delta$  6.89 (s, 1H), 6.82–6.75 (m, 2H), 5.97 (s, 2H), 3.60 (t,  $J = 7.1$  Hz, 1H), 3.57–3.52 (m, 2H), 1.83–1.76 (m, 2H), 1.76–1.68 (m, 2H), 1.53–1.40 (m, 4H), 0.21 (s, 9H).

$^{13}\text{C}$  NMR (150 MHz,  $\text{CDCl}_3$ )  $\delta$  147.8, 146.4, 135.8, 120.6, 108.4, 108.2, 108.1, 101.1, 87.4, 45.2, 38.7, 38.5, 32.6, 26.6, 26.5, 0.4.

FT-IR (neat) 2940, 2170, 1504, 1486, 1442, 1249, 1041, 938, 843  $\text{cm}^{-1}$ .

MS (ESI)  $m/z$  ( $\text{M}+\text{H}^+$ ) calcd for  $\text{C}_{18}\text{H}_{26}\text{ClO}_2\text{Si}$ : 337.1, found: 337.1.

$[\alpha]_{\text{D}}^{23} = +9.0$  (c 0.60,  $\text{CHCl}_3$ ).

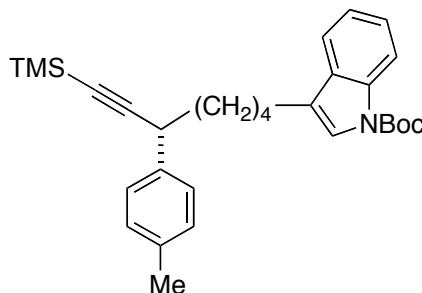

**(R)-Tert-butyl 3-(5-(*p*-tolyl)-7-(trimethylsilyl)hept-6-yn-1-yl)-1H-indole-1-carboxylate (Table 2, entry 13).** *Tert*-butyl 3-(5-(((2,4,6-trimethoxyphenoxy)carbonyl)oxy)-7-



(trimethylsilyl)hept-6-yn-1-yl)-1*H*-indole-1-carboxylate (457 mg, 0.75 mmol) and *p*-tolylzinc iodide (0.30 M solution in THF; 3.75 mL, 1.13 mmol) were used. The product was obtained as a colorless oil. First run: 262 mg (74%, 90% ee). Second run: 247 mg (70%, 89% ee).

The ee of the deprotected product (i.e., the free indole) was determined by HPLC using an IB column (5% IPA in hexanes, 0.9 mL/min) with  $t_r = 26.1$  min (minor), 29.5 min (major).

$^1\text{H}$  NMR (600 MHz,  $\text{CDCl}_3$ )  $\delta$  8.19 (s, 1H), 7.57 (d,  $J = 7.7$  Hz, 1H), 7.41 (s, 1H), 7.37 (t,  $J = 7.4$  Hz, 1H), 7.31–7.27 (m, 3H), 7.19 (d,  $J = 7.9$  Hz, 2H), 3.69 (t,  $J = 7.2$  Hz, 1H), 2.74 (t,  $J = 7.6$  Hz, 2H), 2.40 (s, 3H), 1.87–1.75 (m, 4H), 1.74 (s, 9H), 1.68–1.56 (m, 2H), 0.24 (s, 9H).

$^{13}\text{C}$  NMR (150 MHz,  $\text{CDCl}_3$ )  $\delta$  150.0, 139.1, 136.3, 131.0, 129.3, 127.5, 124.3, 122.4, 121.4, 119.2, 115.4, 108.9, 100.2, 87.2, 83.4, 38.7, 38.5, 29.1, 28.4, 27.4, 25.0, 21.2, 0.4.

FT-IR (neat) 2932, 2857, 2361, 2171, 1733, 1455, 1379, 1251, 1160, 1092, 843, 745  $\text{cm}^{-1}$ .

MS (ESI)  $m/z$  ( $\text{M}-\text{Boc}+\text{H}+\text{H}^+$ ) calcd for  $\text{C}_{25}\text{H}_{32}\text{NSi}$ : 374.2, found: 374.2.

$[\alpha]_D^{23} = +5.7$  (c 0.78,  $\text{CHCl}_3$ ).

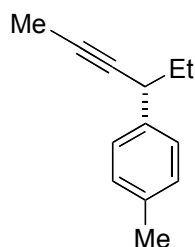

**(*R*)-1-(Hex-4-yn-3-yl)-4-methylbenzene (eq 4).** Hex-4-yn-3-yl (2,4,6-trimethoxyphenyl) carbonate (231 mg, 0.75 mmol) and *p*-tolylzinc iodide (0.30 M solution in THF; 3.75 mL, 1.13 mmol) were used. The product was obtained as a colorless oil. First run: 90 mg (70%, 78% ee). Second run: 96 mg (74%, 78% ee).

The ee was determined by GC on a Chirasil Dex-CB column (90→110 °C @ 0.4 °C/min, then →140 °C @ 15 °C/min, hold 6 min; flow rate 1.0 mL/min) with  $t_r = 31.4$  min (minor), 34.0 min (major).

$^1\text{H}$  NMR (600 MHz,  $\text{CDCl}_3$ )  $\delta$  7.27 (d,  $J = 8.0$  Hz, 2H), 7.17 (d,  $J = 7.9$  Hz, 2H), 3.53–3.48 (m, 1H), 2.37 (s, 3H), 1.90 (s, 3H), 1.80–1.71 (m, 2H), 1.01 (t,  $J = 7.4$  Hz, 3H).

$^{13}\text{C}$  NMR (150 MHz,  $\text{CDCl}_3$ )  $\delta$  139.9, 136.2, 129.2, 127.5, 81.2, 78.3, 39.2, 31.9, 21.3, 12.2, 3.9.

FT-IR (neat) 2967, 2927, 2361, 1513, 1457, 807  $\text{cm}^{-1}$ .

MS (ESI)  $m/z$  ( $\text{M}+\text{H}^+$ ) calcd for  $\text{C}_{13}\text{H}_{17}$ : 173.1, found: 173.1.

$[\alpha]_D^{23} = +6.0$  (c 0.50,  $\text{CHCl}_3$ ).

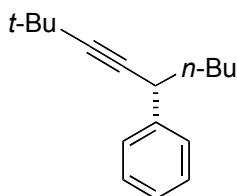

**(R)-(2,2-Dimethylnon-3-yn-5-yl)benzene (eq 5).** 2,2-Dimethylnon-3-yn-5-yl (2,4,6-trimethoxyphenyl) carbonate (142 mg, 0.375 mmol) and phenylzinc iodide (0.30 M solution in THF; 1.88 mL, 0.56 mmol) were used. The product was obtained as a yellow oil. First run: 54 mg (64%, 84% ee). Second run: 51 mg (60%, 81% ee).

The ee was determined by GC on a Chirasil Dex-CB column (100→130 °C @ 10 °C/min, hold 10 min, then →170 °C @ 9 °C/min, hold 5 min; flow rate 1.0 mL/min) with  $t_r$  = 11.4 min (minor), 11.6 min (major).

$^1\text{H}$  NMR (600 MHz,  $\text{CDCl}_3$ )  $\delta$  7.36 (d,  $J$  = 7.2 Hz, 2H), 7.31 (t,  $J$  = 7.7 Hz, 2H), 7.22 (t,  $J$  = 7.3 Hz, 1H), 3.59 (dd,  $J$  = 8.2, 6.1 Hz, 1H), 1.73–1.62 (m, 2H), 1.46–1.28 (m, 4H), 1.26 (s, 9H), 0.90 (t,  $J$  = 7.2 Hz, 3H).

$^{13}\text{C}$  NMR (150 MHz,  $\text{CDCl}_3$ )  $\delta$  143.3, 128.2, 127.4, 126.3, 91.9, 80.0, 39.0, 37.7, 31.4, 29.5, 27.5, 22.4, 14.0.

FT-IR (neat) 2929, 2361, 1494, 1452  $\text{cm}^{-1}$ .

MS (ESI)  $m/z$  ( $\text{M}+\text{H}^+$ ) calcd for  $\text{C}_{17}\text{H}_{25}$ : 229.2, found: 229.2.

$[\alpha]_{\text{D}}^{23} = +8.6$  (c 1.0,  $\text{CHCl}_3$ ).

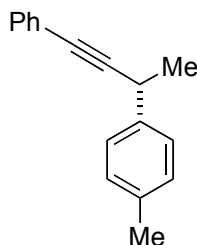

**(R)-1-Methyl-4-(4-phenylbut-3-yn-2-yl)benzene (eq 6).** 4-Phenylbut-3-yn-2-yl (2,4,6-trimethoxyphenyl) carbonate (270 mg, 0.75 mmol) and *p*-tolylzinc iodide (0.30 M solution in THF; 3.75 mL, 1.13 mmol) were used. The product was obtained as a colorless oil. First run: 162 mg (98%, 88% ee). Second run: 152 mg (92%, 88% ee).

The ee was determined by HPLC on an OD-H column (hexanes, 0.9 mL/min) with  $t_r$  = 13.8 min (minor), 22.2 min (major).

$^1\text{H}$  NMR (600 MHz,  $\text{CDCl}_3$ )  $\delta$  7.58–7.56 (m, 2H), 7.47 (d,  $J$  = 8.0 Hz, 2H), 7.39 (t,  $J$  = 5.8 Hz, 3H), 7.28 (d,  $J$  = 7.9 Hz, 2H), 4.07 (q,  $J$  = 7.1 Hz, 1H), 2.46 (s, 3H), 1.70 (d,  $J$  = 7.2 Hz, 3H).

$^{13}\text{C}$  NMR (150 MHz,  $\text{CDCl}_3$ )  $\delta$  140.6, 136.4, 131.9, 129.5, 128.4, 127.9, 127.1, 124.1, 93.1, 82.5, 32.3, 24.8, 21.3.

FT-IR (neat) 2975, 2928, 2361, 1598, 1513, 1490, 1303, 1070, 816, 756, 691  $\text{cm}^{-1}$ .

MS (ESI)  $m/z$  ( $\text{M}+\text{H}^+$ ) calcd for  $\text{C}_{17}\text{H}_{17}$ : 221.1, found: 221.1.

$[\alpha]_{\text{D}}^{23} = -2.8$  (c 0.55,  $\text{CHCl}_3$ ).

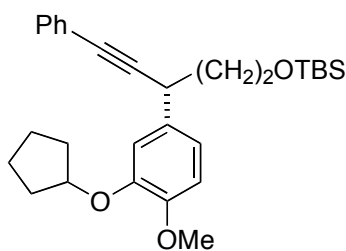

**(R)-Tert-butyl((3-(3-(cyclopentyloxy)-4-methoxyphenyl)-5-phenylpent-4-yn-1-yl)oxy)dimethylsilane (eq 7).** 5-((Tert-butyl dimethylsilyl)oxy)-1-phenylpent-1-yn-3-yl (2,4,6-trimethoxyphenyl) carbonate (325 mg, 0.75 mmol) and 3-cyclopentyloxy-4-methoxyphenylzinc iodide (0.30 M solution in THF; 3.75 mL, 1.13 mmol) were used.<sup>9</sup> The product, a colorless oil that included the corresponding allene (3:1 alkyne:allene), was used directly in the subsequent steps. First run: 273 mg (79%, 92% ee). Second run: 269 mg (78%, 92% ee). Third run (4.0 mmol): 1.34 g (73%, 90% ee).

The ee of the desilylated product was determined by HPLC on an IB column (3% IPA in hexanes, 0.9 mL/min) with  $t_r$  = 35.8 min (major), 38.1 min (minor).

<sup>1</sup>H NMR (600 MHz, CDCl<sub>3</sub>)  $\delta$  7.47 (dd,  $J$  = 7.4, 2.0 Hz, 2H), 7.35–7.31 (m, 3H), 7.03 (d,  $J$  = 1.9 Hz, 1H), 6.99 (dd,  $J$  = 8.2, 1.9 Hz, 1H), 6.87 (d,  $J$  = 8.2 Hz, 1H), 4.86–4.82 (m, 1H), 4.04 (t,  $J$  = 7.5 Hz, 1H), 3.92–3.88 (m, 1H), 3.88 (s, 3H), 3.78–3.73 (m, 1H), 2.04 (dd,  $J$  = 13.0, 6.7 Hz, 2H), 2.01–1.82 (m, 6H), 1.68–1.59 (m, 2H), 0.97 (s, 9H), 0.14 (s, 3H), 0.12 (s, 3H).

<sup>13</sup>C NMR (100 MHz, CDCl<sub>3</sub>, mixture with allene)  $\delta$  205.8, 149.0, 147.8, 134.5, 131.7, 128.6, 128.4, 127.9, 127.2, 124.0, 121.1, 119.7, 114.8, 112.2, 109.7, 91.9, 91.0, 83.3, 80.6, 80.5, 60.8, 56.3, 41.8, 34.2, 33.0, 33.0, 26.2, 24.3, 24.2, 18.5, -4.9.

MS (ESI)  $m/z$  ( $M+H^+$ ) calcd for C<sub>29</sub>H<sub>41</sub>O<sub>3</sub>Si: 465.3, found: 465.3.

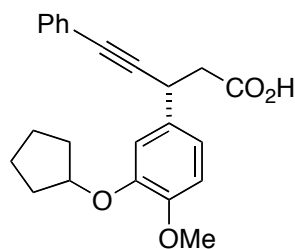

**(R)-3-(3-(Cyclopentyloxy)-4-methoxyphenyl)-5-phenylpent-4-ynoic acid (eq 7).** HCl (2.0 M solution in diethyl ether; 4.0 mL, 8.0 mmol) was added to a solution of (R)-tert-butyl((3-(3-(cyclopentyloxy)-4-methoxyphenyl)-5-phenylpent-4-yn-1-yl)oxy)dimethylsilane (485 mg of a 3:1 alkyne:allene mixture, corresponding to 364 mg (0.78 mmol) of the alkyne) in dichloromethane (50 mL) at 0 °C. The reaction mixture was allowed to warm to r.t. and stirred for 2.5 h. Next, the reaction was quenched by the addition of saturated aqueous NaHCO<sub>3</sub> (20 mL). The layers were separated, and the organic layer was extracted with dichloromethane (3 × 20 mL). The combined organic layers were dried (Na<sub>2</sub>SO<sub>4</sub>), and the solvent was removed in vacuo.

(9) Meyers, A. I.; Snyder, L. J. *Org. Chem.* **1993**, *58*, 36–42.

TPAP (30 mg, 0.085 mmol) was added to a solution of the unpurified alcohol and *N*-methylmorpholine-*N*-oxide (1.12 g, 8.0 mmol) in acetonitrile (2 mL) in a water bath.<sup>10</sup> The reaction mixture was stirred for 3 h, and then it was quenched by the addition of methanol (0.5 mL). The volatiles were removed in vacuo, and the residue was purified by flash chromatography (1→4% MeOH with 1% AcOH in dichloromethane), which afforded the title compound as a yellow oil (244 mg, 86%).

<sup>1</sup>H NMR (600 MHz, CDCl<sub>3</sub>) δ 11.50–10.81 (m, 1H), 7.44 (s, 2H), 7.29 (s, 3H), 7.04 (s, 1H), 7.01 (s, 1H), 6.85–6.80 (m, 1H), 4.81 (s, 1H), 4.34 (s, 1H), 3.84 (s, 3H), 3.03–2.73 (m, 2H), 2.15–1.68 (m, 6H), 1.68–1.55 (m, 2H).

<sup>13</sup>C NMR (150 MHz, CDCl<sub>3</sub>) δ 177.5, 149.1, 147.8, 133.1, 131.8, 128.4, 123.5, 119.5, 114.3, 112.1, 90.4, 83.6, 80.5, 56.2, 44.2, 34.5, 33.0, 32.9, 24.3.

FT-IR (neat) 2960, 2361, 2339, 1717, 1514, 1260, 1136, 1029, 911, 758, 733, 692 cm<sup>-1</sup>.

MS (ESI) *m/z* (M+H<sup>+</sup>) calcd for C<sub>23</sub>H<sub>25</sub>O<sub>4</sub>: 365.1, found: 365.1.

[α]<sub>D</sub><sup>23</sup> = -3.5 (c 0.75, CHCl<sub>3</sub>).

The ee value (90%) was determined by HPLC analysis of the desilylated primary alcohol (see the preceding experimental procedure).

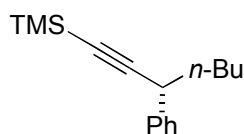

**(R)-Trimethyl(3-phenylhept-1-yn-1-yl)silane (eq 8).** (3-Bromohept-1-yn-1-yl)trimethylsilane (188 mg, 0.75 mmol) and phenylzinc iodide (0.30 M solution in THF; 3.75 mL, 1.13 mmol) were used. The product was obtained as pale-yellow oil. First run: 132 mg (72%, 90% ee). Second run: 135 mg (74%, 88% ee).

The ee was determined by GC on a Chirasil Dex-CB column (100→130 °C @ 10 °C/min, hold 10 min, then →170 °C @ 9 °C/min, hold 5 min; flow rate 1.0 mL/min) with *t*<sub>r</sub> = 12.9 min (minor), 13.0 min (major).

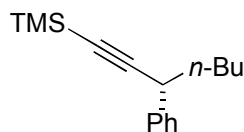

**(R)-Trimethyl(3-phenylhept-1-yn-1-yl)silane (eq 9).** (3-Chlorohept-1-yn-1-yl)trimethylsilane (152 mg, 0.75 mmol) and phenylzinc iodide (0.30 M solution in THF; 3.75 mL, 1.13 mmol) were used. The product was obtained as pale-yellow oil. First run: 132 mg (72%, 90% ee). Second run: 153 mg (84%, 90% ee).

The ee was determined by GC on a Chirasil Dex-CB column (100→130 °C @ 10 °C/min, hold 10 min, then →170 °C @ 9 °C/min, hold 5 min; flow rate 1.0 mL/min) with *t*<sub>r</sub> = 12.9 min (minor), 13.0 min (major).

(10) Schmidt, A.-K. C.; Stark, C. B. W. *Org. Lett.* **2011**, *13*, 4164–4167.

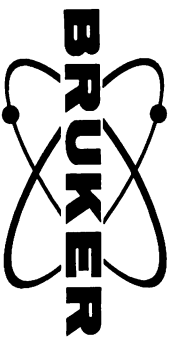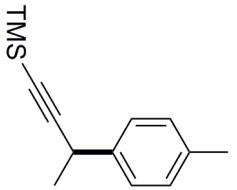

Table 2, entry 1

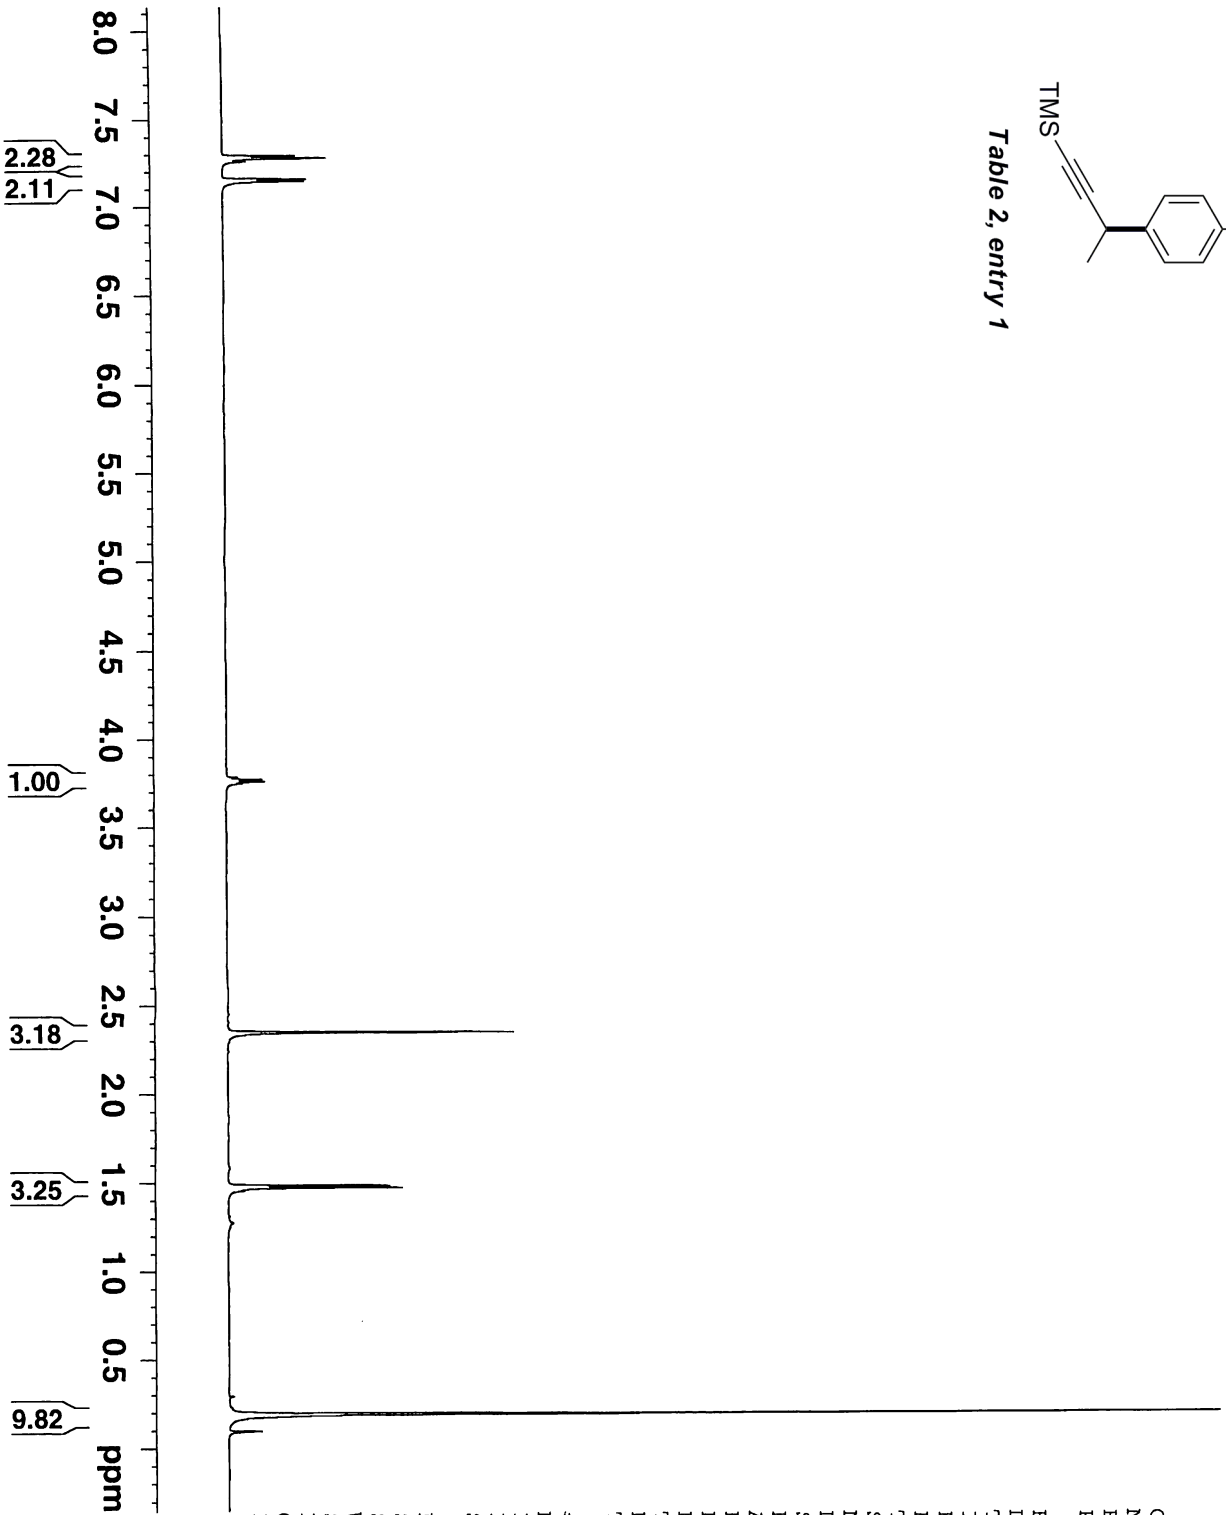

Current Data Parameters  
 NAME ao478B  
 EXPNO 3  
 PROCNO 1

F2 - Acquisition Parameters

Date\_ 20120102  
 Time 13.18  
 INSTRUM spect  
 PROBHID 5 mm BBO BB-1H  
 PULPROG zg30  
 TD 65536  
 SOLVENT CDCl3  
 NS 16  
 DS 0  
 SWH 12376.237 Hz  
 FIDRES 0.188846 Hz  
 AQ 2.6477449 sec  
 RG 1024  
 DW 40.400 usec  
 DE 6.00 usec  
 TE 287.6 K  
 D1 1.00000000 sec  
 TDO 1

===== CHANNEL f1 =====  
 NUCL1 1H  
 P1 11.00 usec  
 PL1 4.00 dB  
 SFO1 600.1337060 MHz

F2 - Processing parameters  
 SI 65536  
 SF 600.1300171 MHz  
 WDW EM  
 SSB 0  
 LB 0.30 Hz  
 GB 0  
 PC 1.00

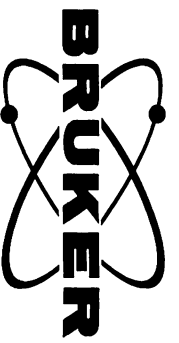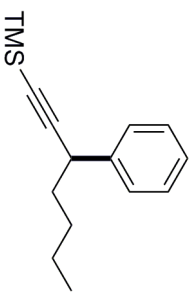

Table 2, entry 2

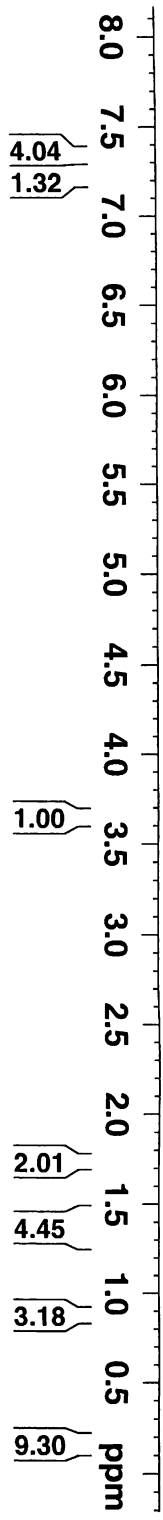

Current Data Parameters  
 NAME ao477  
 EXPNO 1  
 PROCNO 1

F2 - Acquisition Parameters  
 Date\_ 20111129  
 Time 15.13  
 INSTRUM spect  
 PROBHD 5 mm BBO BB-1H  
 PULPROG zg30  
 TD 65536  
 SOLVENT CDCl3  
 NS 10  
 DS 2  
 SWSH 12376.237 Hz  
 FIDRES 0.188846 Hz  
 AQ 2.6477449 sec  
 RG 181  
 DW 40.400 usec  
 DE 6.00 usec  
 TE 293.1 K  
 D1 1.00000000 sec  
 TDO 1

==== CHANNEL f1 =====  
 NUC1 1H  
 P1 11.00 usec  
 PL1 4.00 dB  
 SFO1 600.1337060 MHz  
 F2 - Processing parameters  
 SI 65536  
 SF 600.1300171 MHz  
 WDW EM  
 SSB 0  
 LB 0.30 Hz  
 GB 0  
 PC 1.00

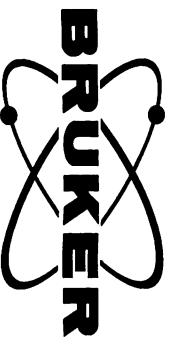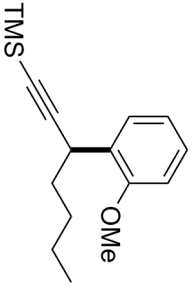

Table 2, entry 3

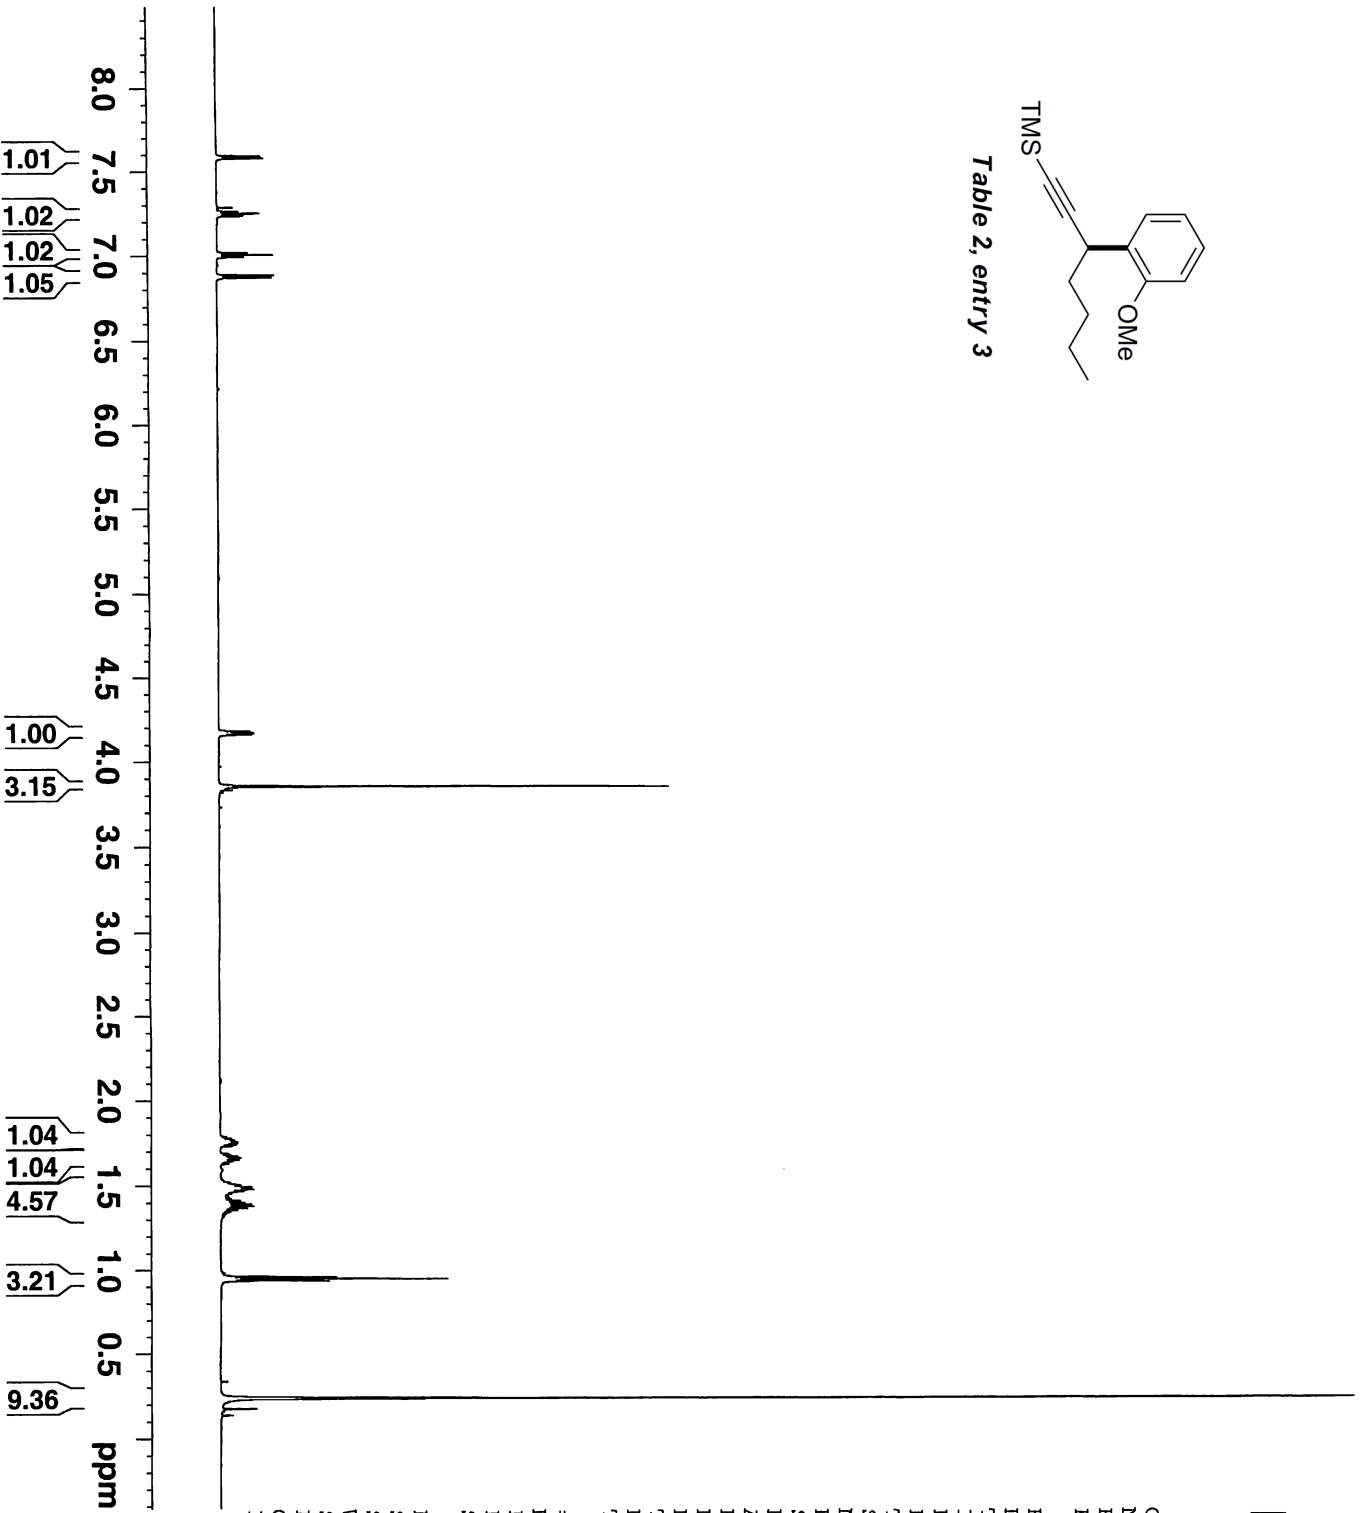

Current Data Parameters  
 NAME a0336b  
 EXPNO 2  
 PROCNO 1

F2 - Acquisition Parameters

Date\_ 20110806  
 Time 13.19  
 INSTRUM spect  
 PROBHD 5 mm CPTXI 1H-  
 PULPROG zg30  
 TD 65536  
 SOLVENT CDCl3  
 NS 16  
 DS 2  
 SWH 12376.237 Hz  
 FIDRES 0.188846 Hz  
 AQ 2.6477449 sec  
 RG 20.2  
 DW 40.400 usec  
 DE 6.00 usec  
 TE 303.1 K  
 D1 1.00000000 sec  
 TD0 1

==== CHANNEL f1 =====

NUC1 1H  
 P1 11.00 usec  
 PL1 4.00 dB  
 SFO1 600.1337060 MHz

F2 - Processing parameters

SI 65536  
 SF 600.1300000 MHz  
 WDW EM  
 SSB 0  
 LB 0.30 Hz  
 GB 0  
 PC 1.00

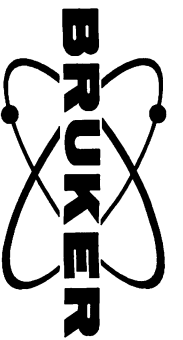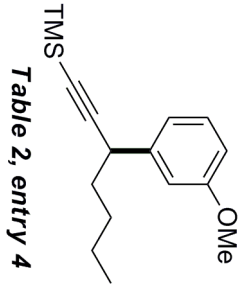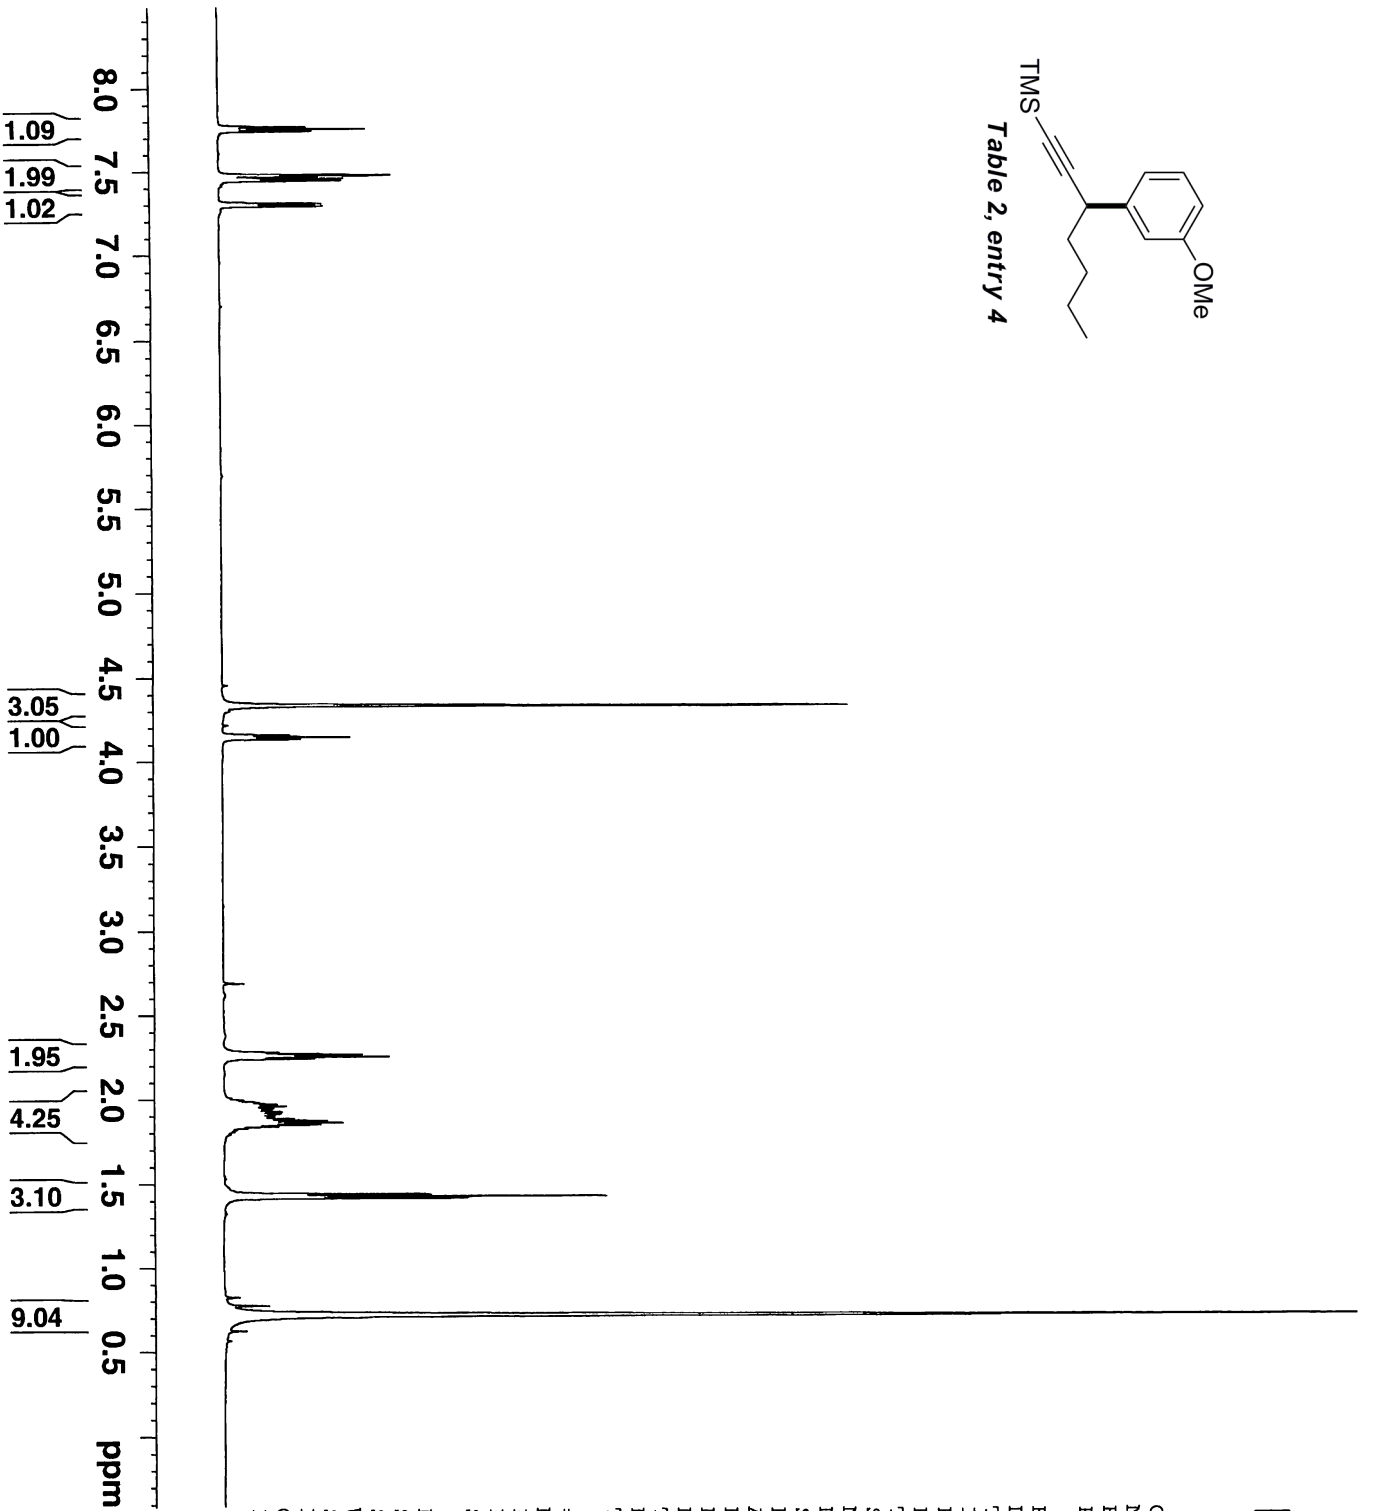

Current Data Parameters  
NAME a0355b  
EXPNO 1  
PROCNO 1

F2 - Acquisition Parameters  
Date\_ 20110507  
Time 13.58  
INSTRUM spect  
PROBHD 5 mm CPTXI 1H-  
PULPROG zg30  
TD 65536  
SOLVENT CDC13  
NS 9  
DS 2  
SWH 12376.237 Hz  
FIDRES 0.188846 Hz  
AQ 2.6477449 sec  
RG 14.3  
DM 40.400 usec  
DE 6.00 usec  
TE 303.3 K  
D1 1.00000000 sec  
TD0 1

==== CHANNEL f1 =====  
NUC1 1H  
P1 11.00 usec  
PL1 4.00 dB  
SFO1 600.1337060 MHz

F2 - Processing parameters  
SI 65536  
SF 600.1297102 MHz  
WDW EM  
SSB 0  
LB 0.30 Hz  
GB 0  
PC 1.00



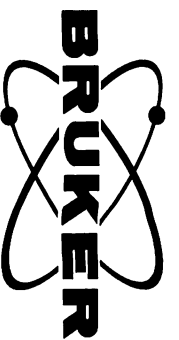

Current Data Parameters  
 NAME ao356a  
 EXPNO 1  
 PROCNO 1

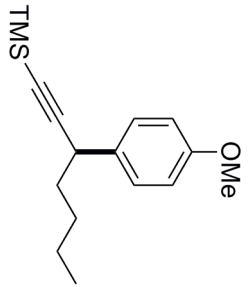

Table 2, entry 5

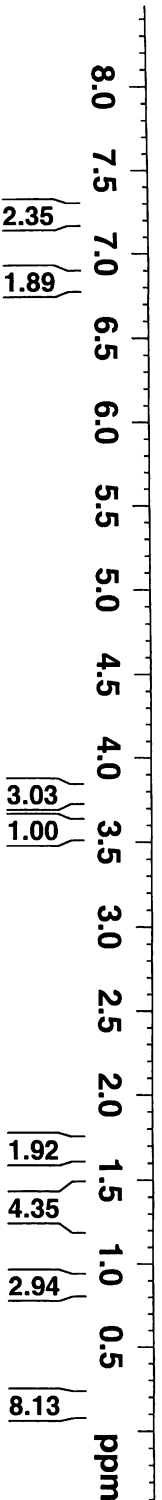

F2 - Acquisition Parameters  
 Date\_ 20110506  
 Time 9.06  
 INSTRUM spect  
 PROBHID 5 mm CPTXI 1H-  
 PULPROG zg30  
 TD 65536  
 SOLVENT CDCl3  
 NS 10  
 DS 2  
 SWH 12376.237 Hz  
 FIDRES 0.188846 Hz  
 AQ 2.6477449 sec  
 RG 20.2  
 DW 40.400 usec  
 DE 6.00 usec  
 TE 302.9 K  
 D1 1.00000000 sec  
 TD0 1

==== CHANNEL f1 =====  
 NUC1 1H  
 P1 11.00 usec  
 PL1 4.00 dB  
 SFO1 600.1337060 MHz

F2 - Processing parameters  
 SI 65536  
 SF 600.1297102 MHz  
 WDM EM  
 SSB 0  
 LB 0.30 Hz  
 GB 0  
 PC 1.00

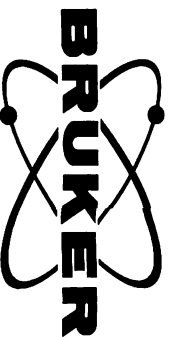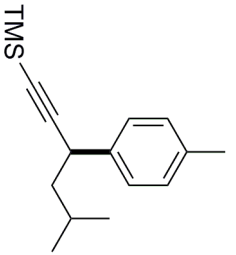

Table 2, entry 6

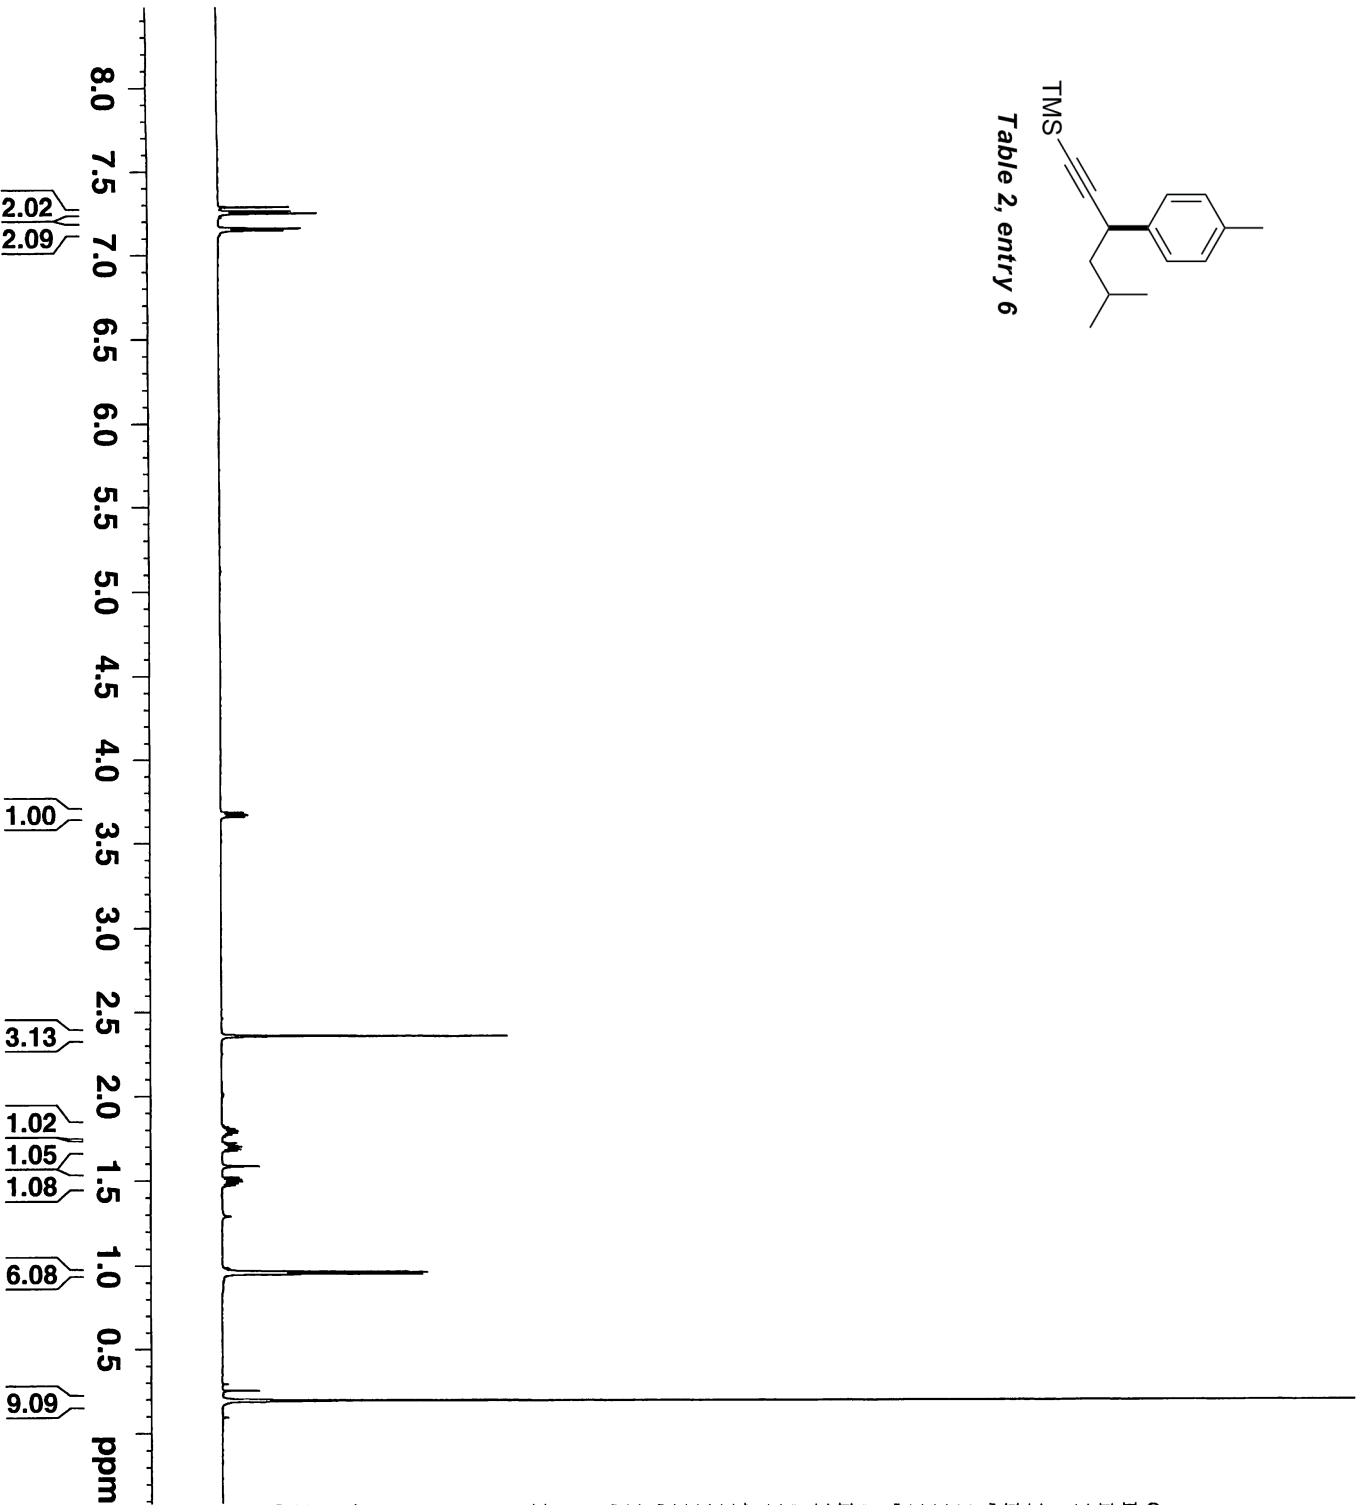

Current Data Parameters  
 NAME ao361b1  
 EXPNO 1  
 PROCNO 1

F2 - Acquisition Parameters

Date\_ 20110930  
 Time 11.01  
 INSTRUM spect  
 PROBHD 5 mm BBO BB-1H  
 PULPROG zg30  
 TD 65536  
 SOLVENT CDCl3  
 NS 16  
 DS 2  
 SWH 12376.237 Hz  
 FIDRES 0.188846 Hz  
 AQ 2.6477449 sec  
 RG 406.4  
 DW 40.400 usec  
 DE 6.00 usec  
 TE 293.0 K  
 D1 1.00000000 sec  
 TDO 1

==== CHANNEL f1 =====

NUC1 1H  
 P1 11.00 usec  
 PL1 4.00 dB  
 SFO1 600.1337060 MHz

F2 - Processing parameters

SI 65536  
 SF 600.1300000 MHz  
 WDW EM  
 SSB 0  
 LB 0.30 Hz  
 GB 0  
 PC 1.00

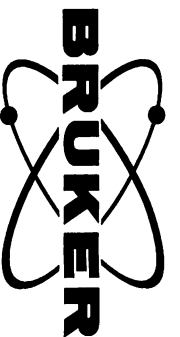

Current Data Parameters  
NAME ao385a  
EXPNO 1  
PROCNO 1

F2 - Acquisition Parameters

Date\_ 20110526  
Time 17.08  
INSTRUM spect  
PROBHD 5 mm CPTXI 1H-  
PULPROG zg30  
TD 65536  
SOLVENT CDCl3  
NS 16  
DS 2  
SWH 12376.237 Hz  
FIDRES 0.188846 Hz  
AQ 2.6477449 sec  
RG 18  
DW 40.400 usec  
DE 6.00 usec  
TE 293.2 K  
D1 1.00000000 sec  
TD0 1

==== CHANNEL f1 =====

NUC1 1H  
P1 11.00 usec  
PL1 4.00 dB  
SFO1 600.1337060 MHz

F2 - Processing parameters

SI 65536  
SF 600.1300008 MHz  
WDW EM  
SSB 0  
LB 0.30 Hz  
GB 0  
PC 1.00

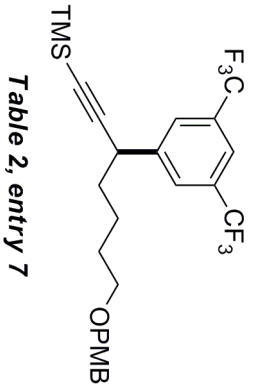

Table 2, entry 7

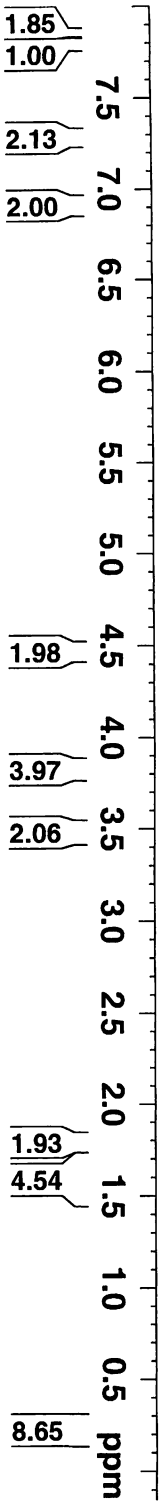

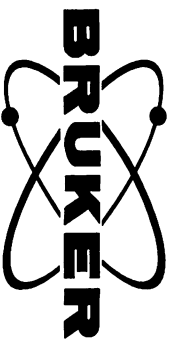

82-S

Current Data Parameters  
NAME ao408B.R1  
EXPNO 1  
PROCNO 1

F2 - Acquisition Parameters

Date\_ 20110723  
Time 11.34  
INSTRUM spect  
PROBHD 5 mm CPTXI IH-  
PULPROG zg30  
TD 65536  
SOLVENT CDCl3  
NS 16  
DS 2  
SWH 12376.237 Hz  
FIDRES 0.188846 Hz  
AQ 2.6477449 sec  
RG 20.2  
DW 40.400 usec  
DE 6.00 usec  
TE 303.1 K  
D1 1.00000000 sec  
TD0 1

==== CHANNEL f1 =====  
NUC1 1H  
P1 11.00 usec  
PL1 4.00 dB  
SFO1 600.1337060 MHz

F2 - Processing parameters  
SI 65536  
SF 600.1300000 MHz  
WDW EM  
SSB 0  
LB 0.30 Hz  
GB 0  
PC 1.00

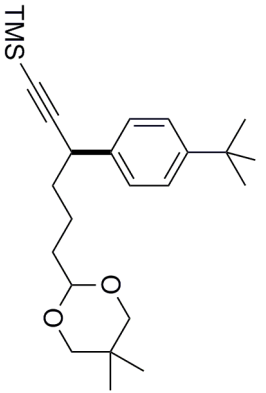

Table 2, entry 8

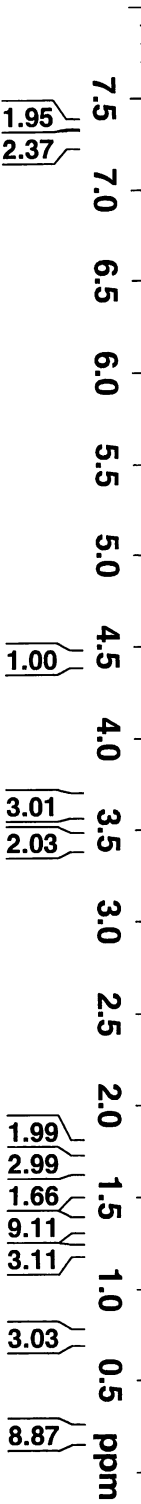

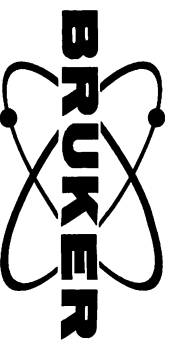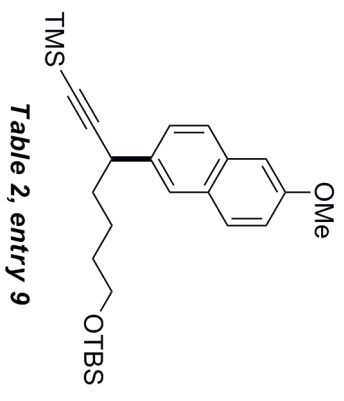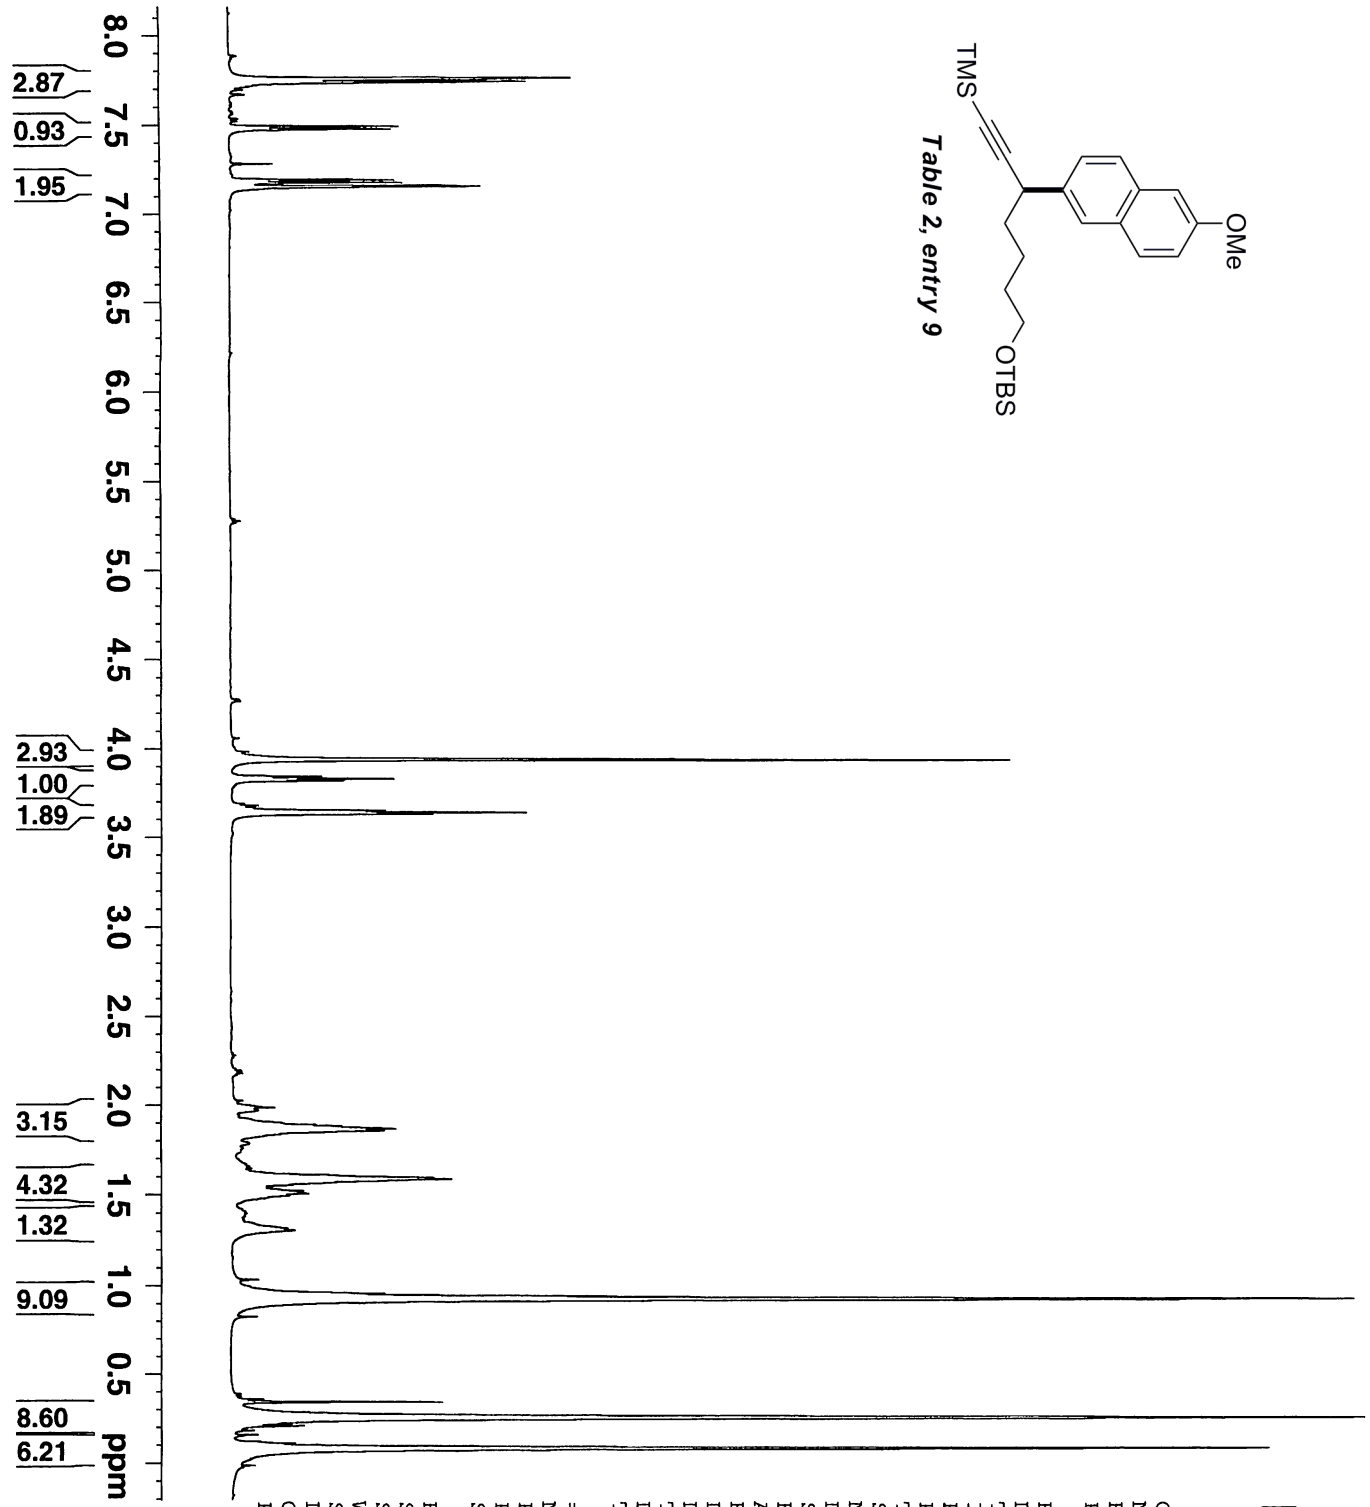

Current Data Parameters  
 NAME a0394a  
 EXPNO 1  
 PROCNO 1

F2 - Acquisition Parameters

Date\_ 20110527  
 Time 18.23  
 INSTRUM spect  
 PROBHD 5 mm CPTXI IH-  
 PULPROG zg30  
 TD 65536  
 SOLVENT CDCl3  
 NS 16  
 DS 2  
 SWH 12376.237 Hz  
 FIDRES 0.188846 Hz  
 AQ 2.6477449 sec  
 RG 7.1  
 DW 40.400 usec  
 DE 6.00 usec  
 TE 298.2 K  
 D1 1.00000000 sec  
 TDO 1

==== CHANNEL f1 =====

NUC1 1H  
 P1 11.00 usec  
 PL1 4.00 dB  
 SFO1 600.1337060 MHz

F2 - Processing parameters  
 SI 65536  
 SF 600.1300031 MHz  
 WDW EM  
 SSB 0  
 LB 0.30 Hz  
 GB 0  
 PC 1.00

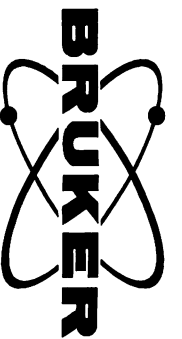

Current Data Parameters  
NAME ao383.2  
EXPNO 1  
PROCNO 1

F2 - Acquisition Parameters

Date\_ 20110930  
Time 11.15  
INSTRUM spect  
PROBHD 5 mm BBO BB-1H  
PULPROG zg30  
TD 65536  
SOLVENT CDCl3  
NS 16  
DS 2  
SWH 12376.237 Hz  
FIDRES 0.188846 Hz  
AQ 2.6477449 sec  
RG 228.1  
DW 40.400 usec  
DE 6.00 usec  
TE 293.0 K  
D1 1.00000000 sec  
TD0 1

==== CHANNEL f1 =====  
NUC1 1H  
P1 11.00 usec  
PL1 4.00 dB  
SFO1 600.1337060 MHz

F2 - Processing parameters  
SI 65536  
SF 600.1300000 MHz  
WDW EM  
SSB 0  
LB 0.30 Hz  
GB 0  
PC 1.00

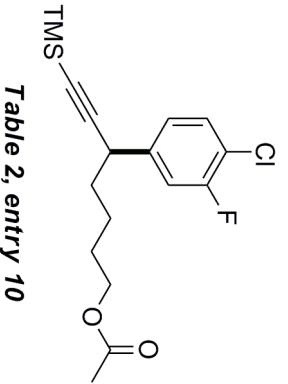

Table 2, entry 10

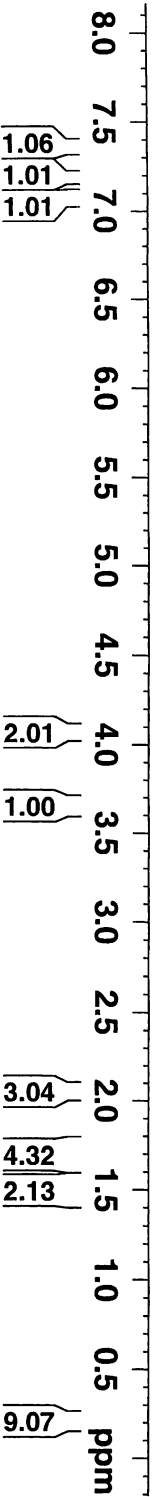

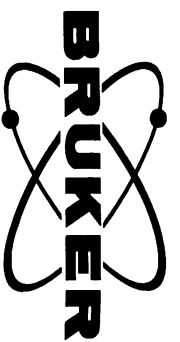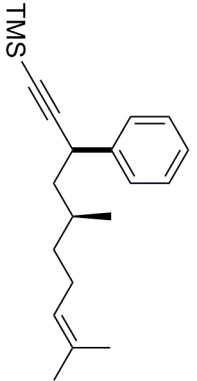

Table 2, entry 11

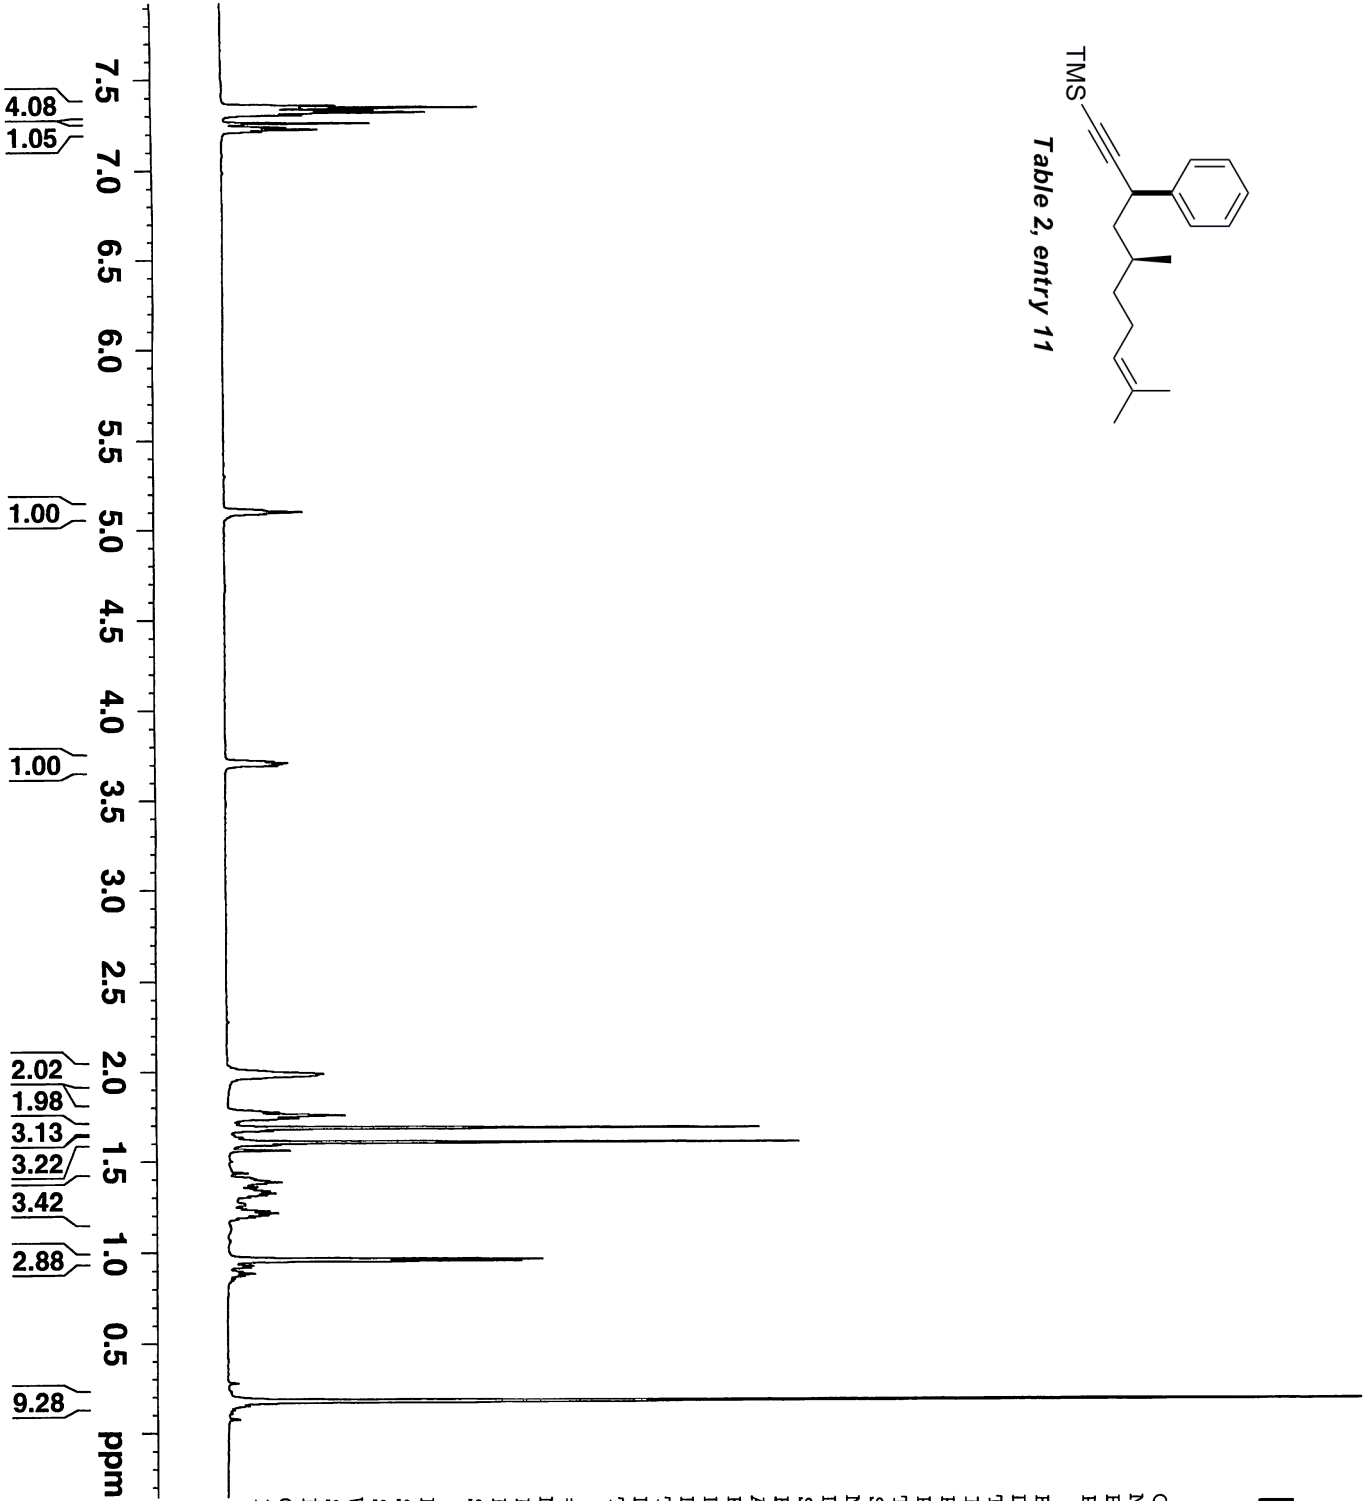

Current Data Parameters  
 NAME a0360a  
 EXPNO 5  
 PROCNO 1

F2 - Acquisition Parameters  
 Date\_ 20120102  
 time 15.18

INSTRUM spect  
 PROBHD 5 mm BBO BB-1H  
 PULPROG zg30  
 TD 65536  
 SOLVENT CDCl3  
 NS 16  
 DS 0

SWH 12376.237 Hz  
 FIDRES 0.188846 Hz  
 AQ 2.6477449 sec

RG 645.1  
 DW 40.400 usec  
 DE 6.00 usec  
 TE 287.7 K  
 D1 1.00000000 sec  
 TD0 1

==== CHANNEL f1 =====  
 NUC1 1H  
 P1 11.00 usec  
 PL 4.00 dB  
 SFO1 600.1337060 MHz

F2 - Processing parameters  
 SI 65536  
 SF 600.1300171 MHz  
 WDW EM  
 SSB 0  
 LB 0.30 Hz  
 GB 0  
 PC 1.00

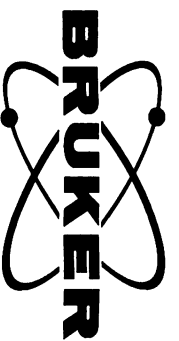

Current Data Parameters  
NAME ao401a  
EXPNO 5  
PROCNO 1

F2 - Acquisition Parameters

Date\_ 20120102  
Time 15.21  
INSTRUM spect  
PROBHD 5 mm BBO BB-1H  
PULPROG zg30  
TD 65536  
SOLVENT CDCl3  
NS 16  
DS 0  
SWH 12376.237 Hz  
FIDRES 0.188846 Hz  
AQ 2.6477449 sec  
RG 645.1  
DW 40.400 usec  
DE 6.00 usec  
TE 287.8 K  
D1 1.00000000 sec  
TD0 1

==== CHANNEL f1 =====

NUC1 1H  
P1 11.00 usec  
PL1 4.00 dB  
SFO1 600.1337060 MHz

F2 - Processing parameters

SI 65536  
SF 600.1300171 MHz  
WDW EM  
SSB 0  
LB 0.30 Hz  
GB 0  
PC 1.00

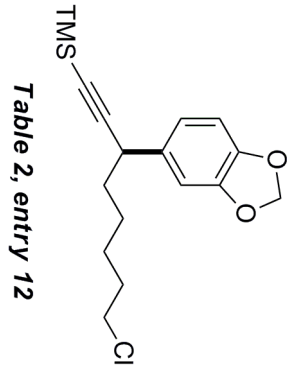

Table 2, entry 12

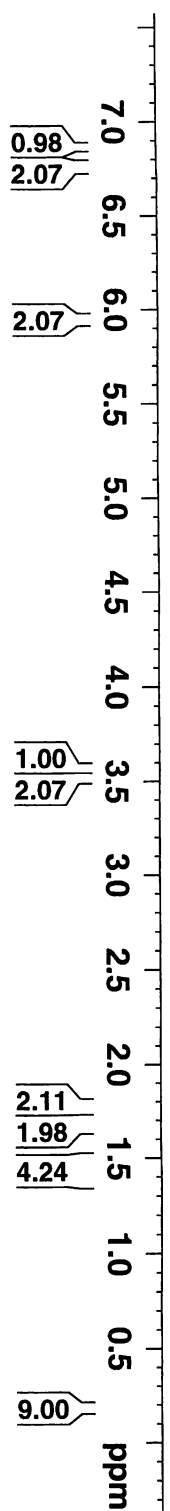



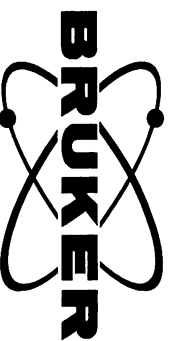

33-33

Current Data Parameters  
NAME a0436a  
EXPNO 3  
PROCNO 1

F2 - Acquisition Parameters

Date\_ 20110630  
Time 16.03  
INSTRUM spect  
PROBHD 5 mm CPTXI 1H-  
PULPROG zg30  
TD 65536  
SOLVENT CDCl3  
NS 12  
DS 2  
SWH 12376.237 Hz  
FIDRES 0.188846 Hz  
AQ 2.6477449 sec  
RG 11.3  
DW 40.400 usec  
DE 6.00 usec  
TE 303.2 K  
D1 1.00000000 sec  
TD0 1

==== CHANNEL f1 =====  
NUC1 1H  
P1 11.00 usec  
PL1 4.00 dB  
SFO1 600.1337060 MHz

F2 - Processing parameters  
SI 65536  
SF 600.1300000 MHz  
WDW EM  
SSB 0  
LB 0.30 Hz  
GB 0  
PC 1.00

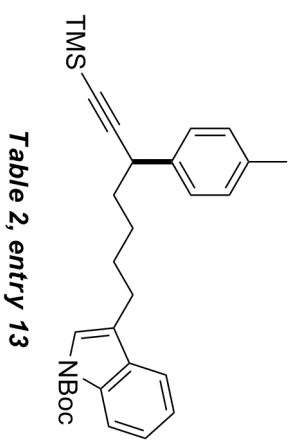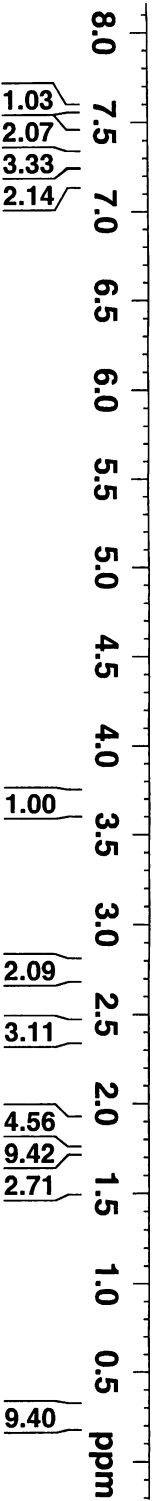

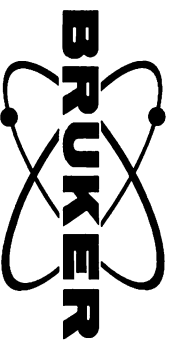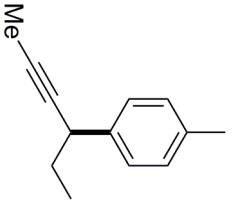

Equation 4

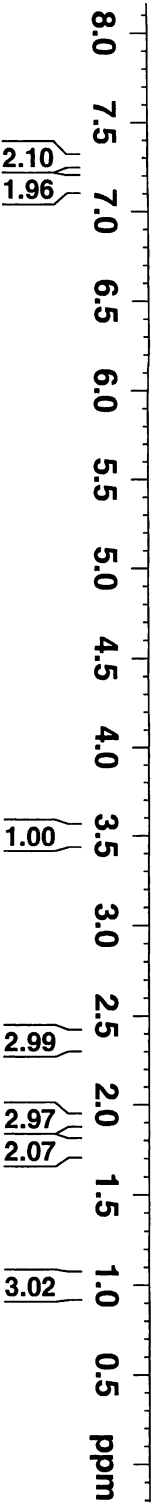

Current Data Parameters  
 NAME a0334b  
 EXPNO 4  
 PROCNO 1

F2 - Acquisition Parameters

Date\_ 20110523  
 Time 17.44  
 INSTRUM spect  
 PROBHD 5 mm CPTXI IH-  
 PULPROG zg30  
 TD 65536  
 SOLVENT CDCl3  
 NS 16  
 DS 2  
 SWH 12376.237 Hz  
 FIDRES 0.188846 Hz  
 AQ 2.6477449 sec  
 RG 16  
 DW 40.400 usec  
 DE 6.00 usec  
 TE 283.0 K  
 D1 1.00000000 sec  
 TD0 1

==== CHANNEL f1 =====  
 NUC1 1H  
 P1 11.00 usec  
 PL1 4.00 dB  
 SF01 600.1337060 MHz  
 F2 - Processing parameters  
 SI 65536  
 SF 600.1300000 MHz  
 WDW EM  
 SSB 0  
 LB 0.30 Hz  
 GB 0  
 PC 1.00

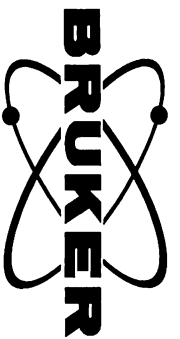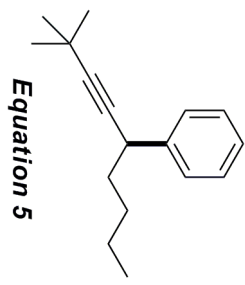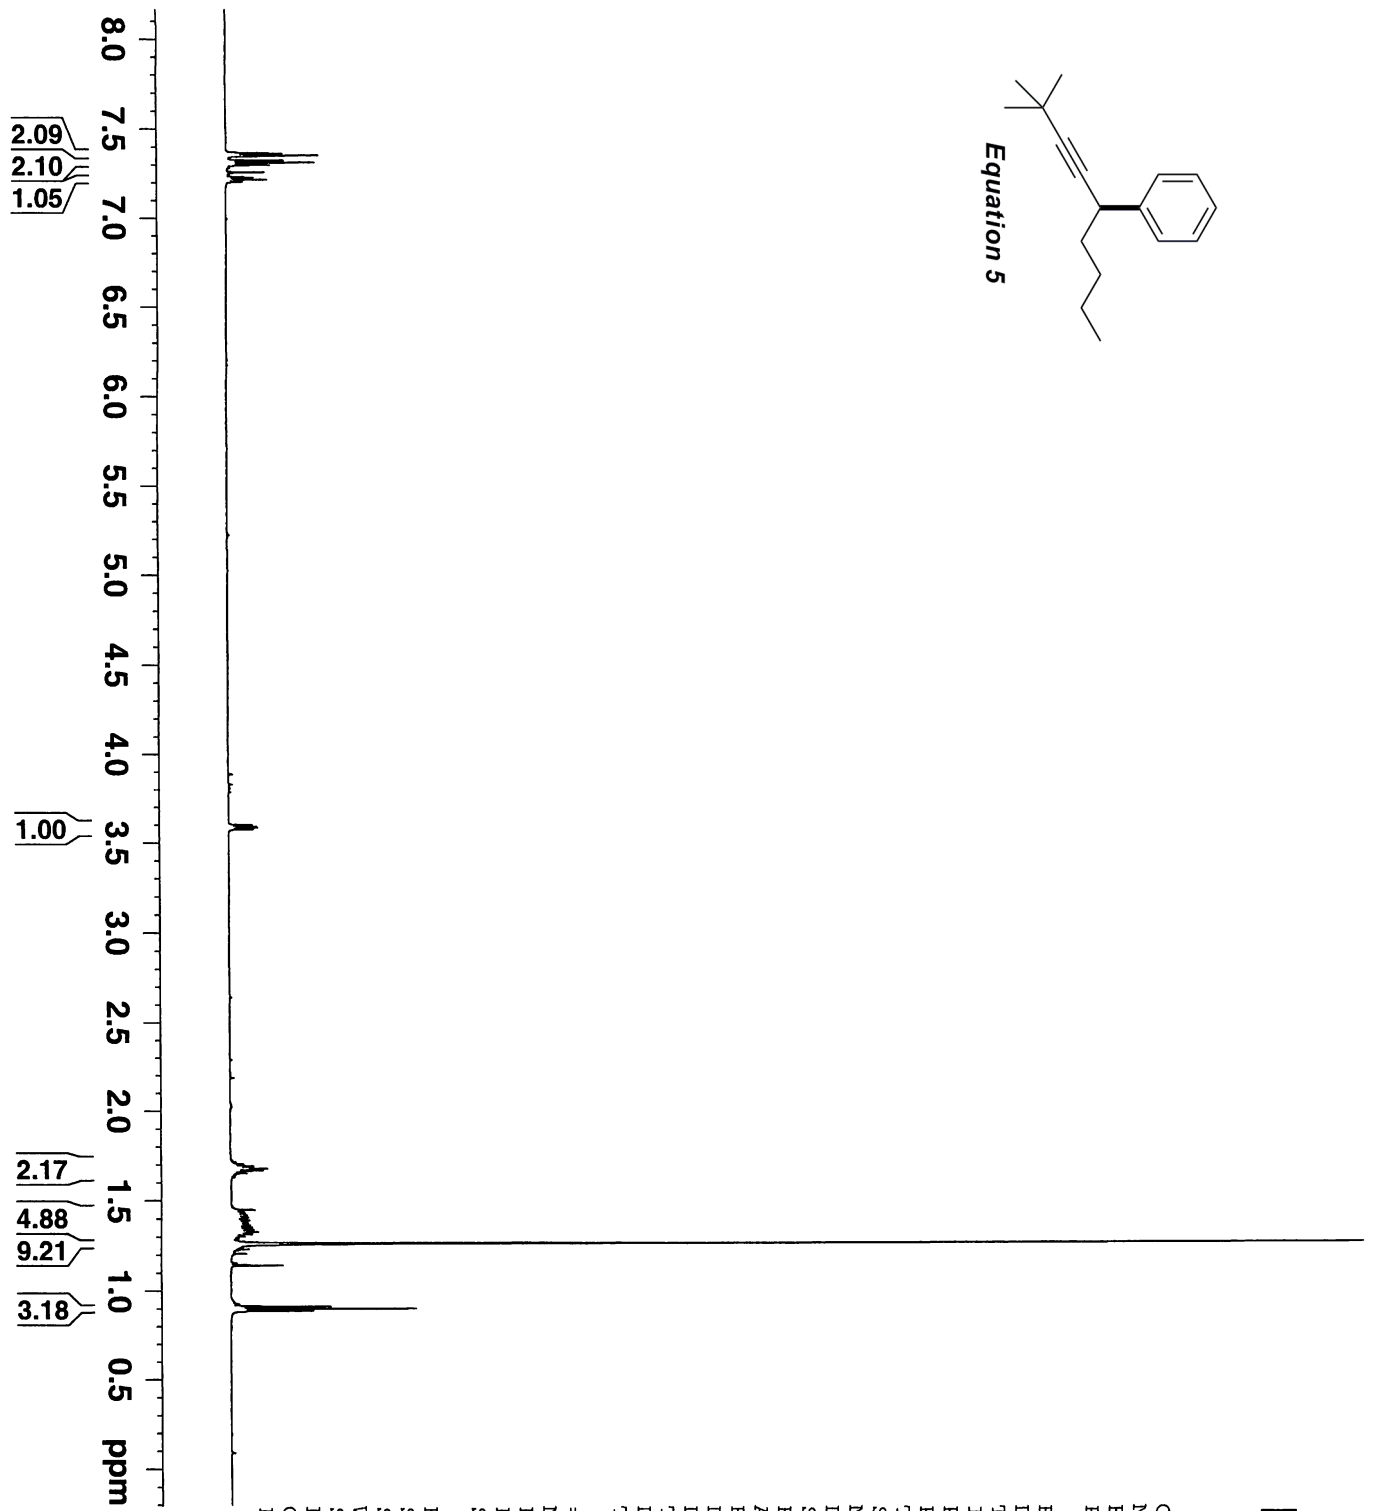

Current Data Parameters  
 NAME a0512B  
 EXPNO 1  
 PROCNO 1

F2 - Acquisition Parameters  
 Date\_ 20111128  
 Time 17.50  
 INSTRUM spect  
 PROBHD 5 mm BBO BB-1H  
 PULPROG zg30  
 TD 65536  
 SOLVENT CDC13  
 NS 10  
 DS 2  
 SWH 12376.237 Hz  
 FIDRES 0.188846 Hz  
 AQ 2.6477449 sec  
 RG 406.4  
 DW 40.400 usec  
 DE 6.00 usec  
 TE 293.0 K  
 D1 1.00000000 sec  
 TD0 1

==== CHANNEL f1 =====  
 NUCL 1H  
 P1 11.00 usec  
 PL1 4.00 dB  
 SFO1 600.1337060 MHz

F2 - Processing parameters  
 SI 65536  
 SF 600.1300171 MHz  
 WDW EM  
 SSB 0  
 LB 0.30 Hz  
 GB 0  
 PC 1.00

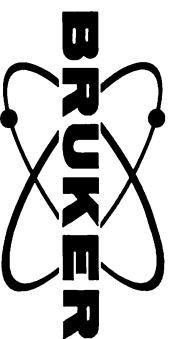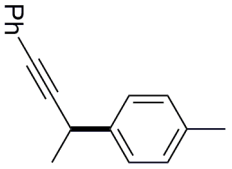

Equation 6

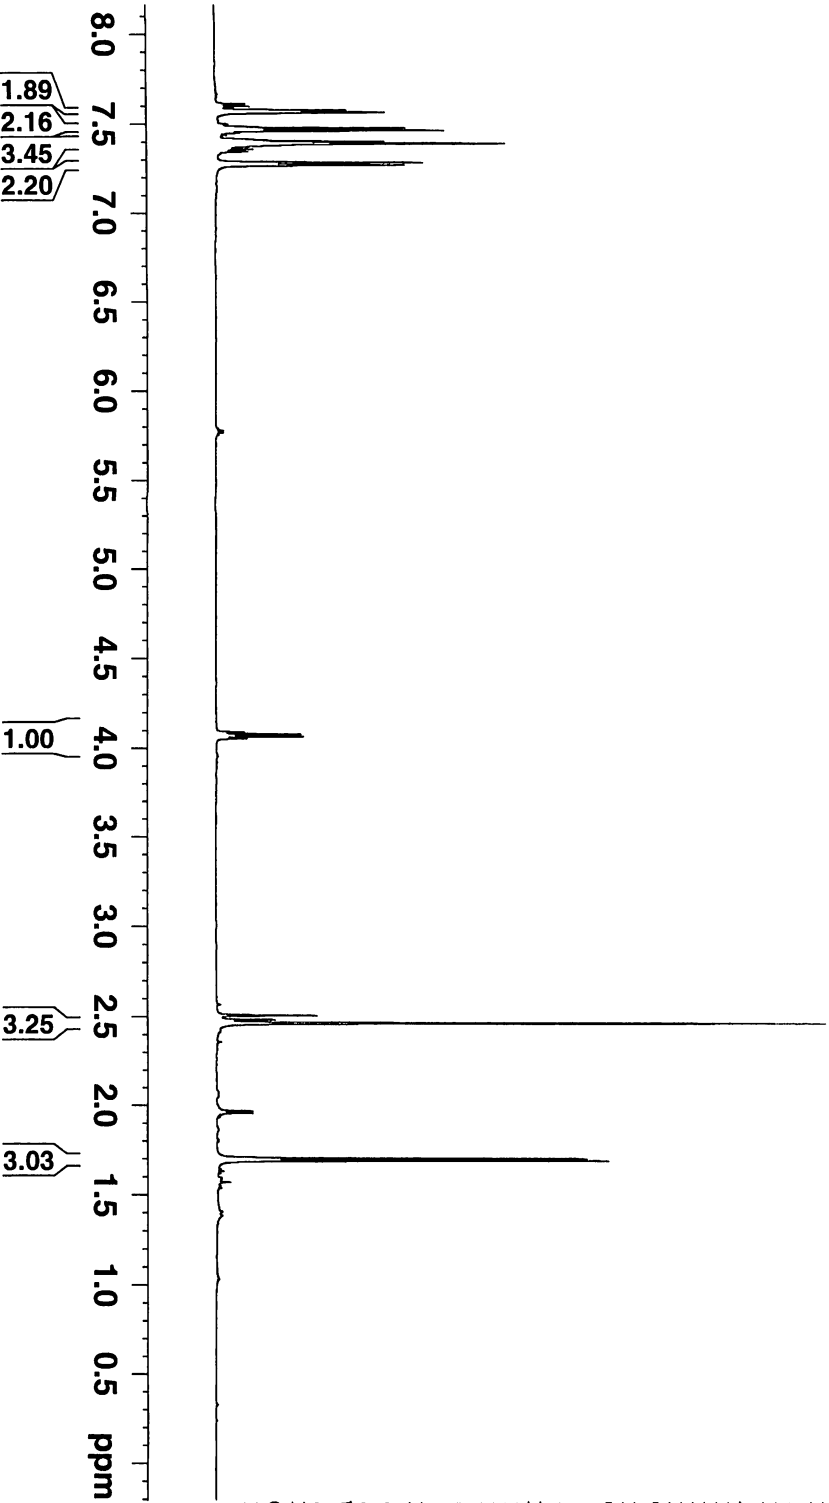

Current Data Parameters  
 NAME ac320.1  
 EXPNO 1  
 PROCNO 1

F2 - Acquisition Parameters

Date\_ 20110314  
 Time 14.36  
 INSTRUM spect  
 PROBHD 5 mm CPTXI 1H-  
 PULPROG zg30  
 TD 65536  
 SOLVENT CDCl3  
 NS 12  
 DS 2  
 SMH 12376.237 Hz  
 FIDRES 0.188846 Hz  
 AQ 2.6477449 sec  
 RG 7.1  
 DW 40.400 usec  
 DE 6.00 usec  
 TE 300.0 K  
 D1 1.00000000 sec  
 TDO 1

==== CHANNEL f1 =====

NUC1 1H  
 P1 11.00 usec  
 PL1 4.00 dB  
 SFO1 600.1337060 MHz

F2 - Processing Parameters

SI 65536  
 SF 600.1300000 MHz  
 WDW EM  
 SSB 0  
 LB 0.30 Hz  
 GB 0  
 PC 1.00

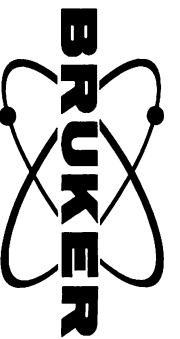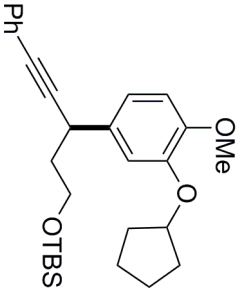

Equation 7

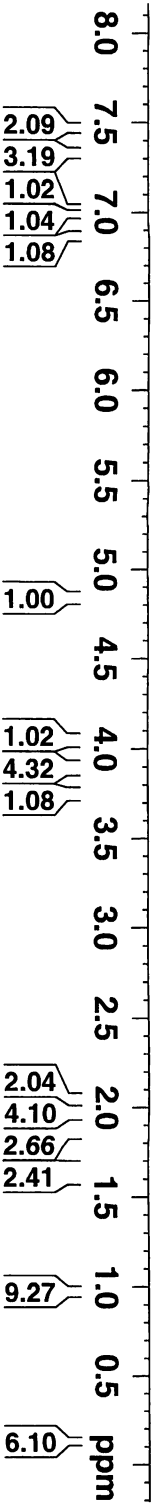

```

Current Data Parameters
NAME          ao439a2
EXPNO         1
PROCNO        1

F2 - Acquisition Parameters
Date_         20110930
Time          11.09
INSTRUM       spect
PROBHD        5 mm BBO BB-1H
PULPROG       zg30
TD            65536
SOLVENT       CDCl3
NS            16
DS            2
SWH           12376.237 Hz
FIDRES        0.188846 Hz
AQ            2.6477449 sec
RG            101.6
DE            40.400 usec
TE            293.0 K
D1            1.00000000 sec
TD0           1

===== CHANNEL f1 =====
NUC1          1H
P1            11.00 usec
PL1           4.00 dB
SFO1          600.1337060 MHz

F2 - Processing parameters
SI            65536
SF            600.1300000 MHz
WDW           EM
SSB           0
LB            0.30 Hz
GB            0
PC            1.00
  
```

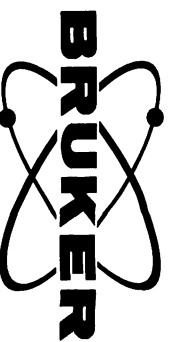

Current Data Parameters  
NAME ao462pt1c1f1  
EXPNO 1  
PROCNO 1

F2 - Acquisition Parameters  
Date\_ 20110824  
Time 15.52  
INSTRUM spect  
PROBHD 5 mm CPTXI 1H-  
PULPROG zg30  
TD 65536  
SOLVENT CDCl3  
NS 16  
DS 2  
SWH 12376.237 Hz  
FIDRES 0.188846 Hz  
AQ 2.6477449 sec  
RG 35.9  
DW 40.400 usec  
DE 6.00 usec  
TE 293.2 K  
D1 1.00000000 sec  
TD0 1

==== CHANNEL f1 =====  
NUC1 1H  
P1 11.00 usec  
PL1 4.00 dB  
SFO1 600.1337060 MHz  
F2 - Processing parameters  
SI 65536  
SF 600.1300177 MHz  
WDW EM  
SSB 0  
LB 0.30 Hz  
GB 0  
PC 1.00

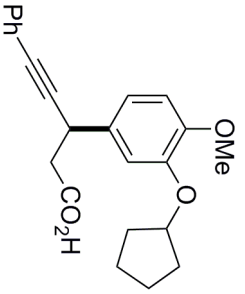

Equation 7

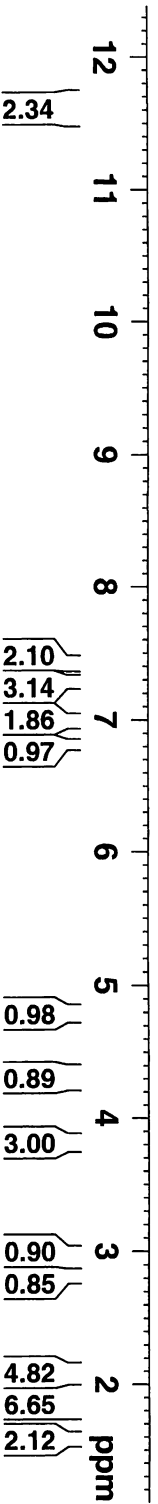

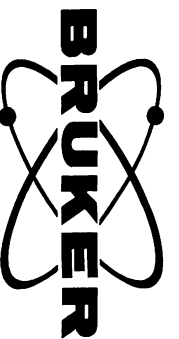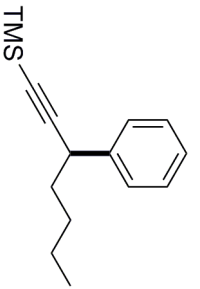

Equation 8

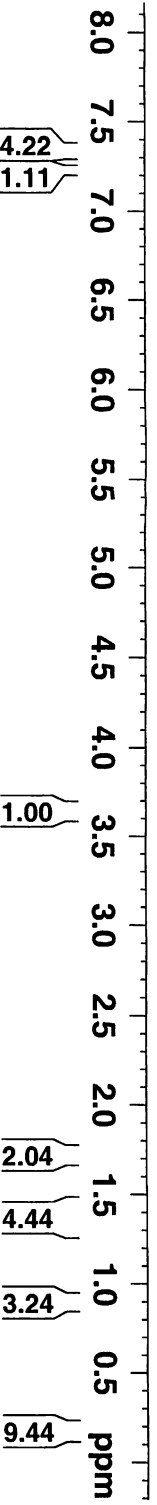

Current Data Parameters  
NAME ao531A  
EXPNO 1  
PROCNO 1

F2 - Acquisition Parameters  
Date\_ 20111211  
Time 17.41  
INSTRUM spect  
PROBHD 5 mm BBO BB-1H  
PULPROG zg30  
TD 65536  
SOLVENT CDCl3  
NS 8  
DS 0  
SWH 12376.237 Hz  
FIDRES 0.188846 Hz  
AQ 2.6477449 sec  
RG 645.1  
DW 40.400 usec  
DE 6.00 usec  
TE 286.9 K  
D1 1.00000000 sec  
TD0 1

==== CHANNEL f1 =====  
NUC1 1H  
P1 11.00 usec  
PL1 4.00 dB  
SFO1 600.1337060 MHz  
F2 - Processing parameters  
SI 65536  
SF 600.1300171 MHz  
WDW EM  
SSB 0  
LB 0.30 Hz  
GB 0  
PC 1.00

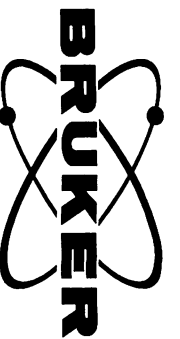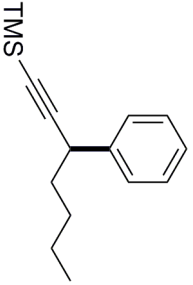

Equation 9

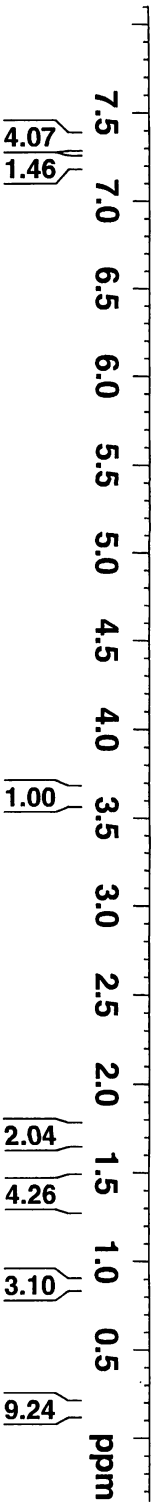

Current Data Parameters  
NAME ao532A  
EXPNO 1  
PROCNO 1

F2 - Acquisition Parameters  
Date\_ 20111211  
Time 17.45  
INSTRUM spect  
PROBHD 5 mm BBO BB-1H  
PULPROG zg30  
TD 65536  
SOLVENT CDCl3  
NS 8  
DS 0  
SWH 12376.237 Hz  
FIDRES 0.188846 Hz  
AQ 2.6477449 sec  
RG 645.1  
DW 40.400 usec  
DE 6.00 usec  
TE 287.0 K  
D1 1.00000000 sec  
TD0 1

==== CHANNEL f1 =====  
NUC1 1H  
P1 11.00 usec  
PL1 4.00 dB  
SFO1 600.1337060 MHz

F2 - Processing Parameters  
SI 65536  
SF 600.1300171 MHz  
WDW EM  
SSB 0  
LB 0.30 Hz  
GB 0  
PC 1.00



```

=====
Injection Date   : 3/13/2011 3:15:52 AM      Seq. Line   :    8
Sample Name     :                          Location    : Vial 5
Acq. Operator   : AJ0                      Inj         :    1
Acq. Instrument : Instrument 3              Inj Volume  : 1 µl
Different Inj Volume from Sequence !      Actual Inj Volume : 5 µl
Acq. Method     : C:\HPCHEM\3\METHODS\AJ075180.M
Last changed    : 3/12/2011 6:09:42 PM by AJ0
Analysis Method : C:\HPCHEM\3\METHODS\RL80180.M
Last changed    : 10/10/2011 9:43:53 AM by HD
                  (modified after loading)
    
```

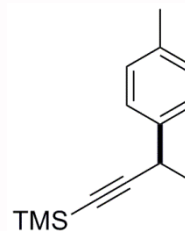

**Table 2, entry 1  
with (3S,8R)**

Initial test

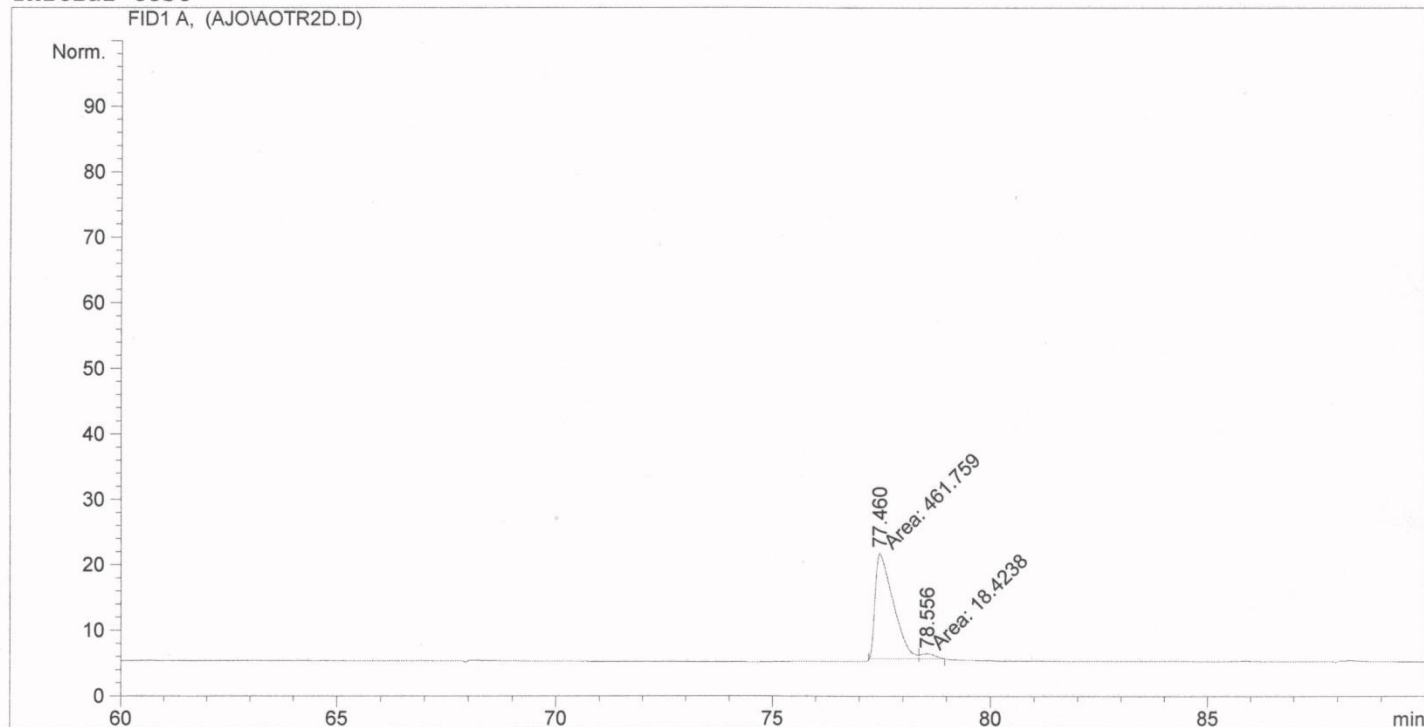

=====  
Area Percent Report  
=====

```

Sorted By      :      Signal
Multiplier     :      1.0000
Dilution       :      1.0000
Use Multiplier & Dilution Factor with ISTDs
    
```

Signal 1: FID1 A,

| Peak # | RetTime [min] | Type | Width [min] | Area [pA*s] | Height [pA] | Area %   |
|--------|---------------|------|-------------|-------------|-------------|----------|
| 1      | 77.460        | MF   | 0.4775      | 461.75916   | 16.11809    | 96.16317 |
| 2      | 78.556        | FM   | 0.3845      | 18.42380    | 7.98504e-1  | 3.83683  |

Totals :                    480.18296    16.91659

Results obtained with enhanced integrator!

=====  
\*\*\* End of Report \*\*\*

```

=====
Injection Date : 10/15/2011 2:57:39 PM      Seq. Line : 18
Sample Name    :                               Location  : Vial 4
Acq. Operator  : HD                           Inj       : 1
Acq. Instrument : Instrument 3                 Inj Volume: 1 µl
Different Inj Volume from Sequence !         Actual Inj Volume : 5 µl
Acq. Method    : C:\HPCHEM\3\METHODS\AJ075180.M
Last changed   : 3/12/2011 6:09:42 PM by AJO
Analysis Method : C:\HPCHEM\3\METHODS\SN100150.M
Last changed   : 1/25/2012 10:45:54 AM by SN
                (modified after loading)
=====
    
```

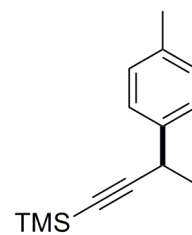

**Table 2, entry 1  
with (3S,8R)**

Initial test

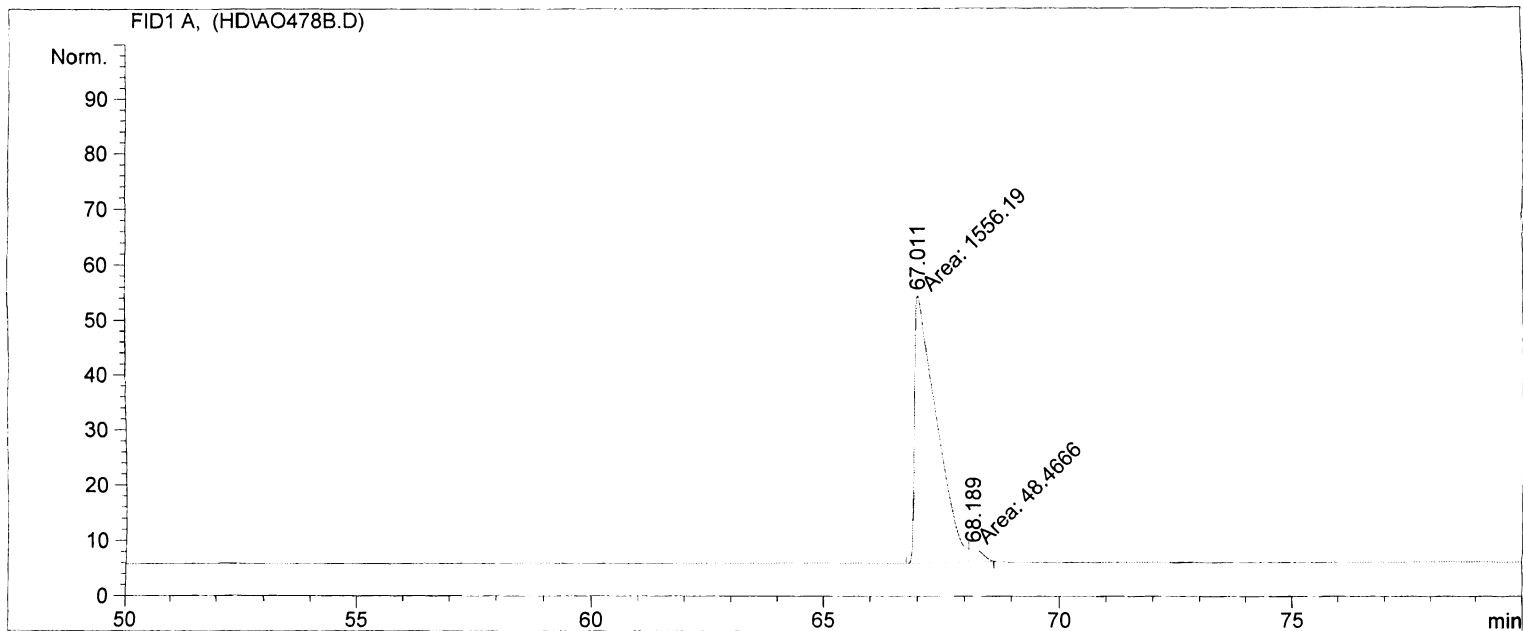

=====  
Area Percent Report  
=====

```

Sorted By      : Signal
Multiplier     : 1.0000
Dilution       : 1.0000
Use Multiplier & Dilution Factor with ISTDs
    
```

Signal 1: FID1 A,

| Peak # | RetTime [min] | Type | Width [min] | Area [pA*s] | Height [pA] | Area %   |
|--------|---------------|------|-------------|-------------|-------------|----------|
| 1      | 67.011        | MF   | 0.5358      | 1556.18994  | 48.40761    | 96.97963 |
| 2      | 68.189        | FM   | 0.3314      | 48.46662    | 2.43725     | 3.02037  |

Totals :                      1604.65656    50.84486

Results obtained with enhanced integrator!

=====  
\*\*\* End of Report \*\*\*

```

=====
Injection Date : 2/23/2011 1:19:55 PM      Seq. Line : 1
Sample Name    :                               Location  : Vial 8
Acq. Operator  : AJO                          Inj       : 1
Acq. Instrument : Instrument 3                 Inj Volume: 1 µl
Different Inj Volume from Sequence !         Actual Inj Volume: 5 µl
Acq. Method    : C:\HPCHEM\3\METHODS\AJ0100.M
Last changed   : 10/13/2010 9:09:31 AM by AJO
Analysis Method : C:\HPCHEM\3\METHODS\AJ065VS2.M
Last changed   : 2/23/2011 1:41:08 PM by AJO
                                           (modified after loading)
=====
    
```

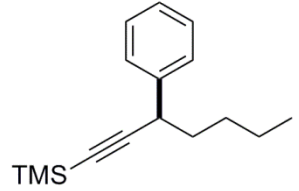

Table 2, entry 2  
with (3S,8R)

Initial test

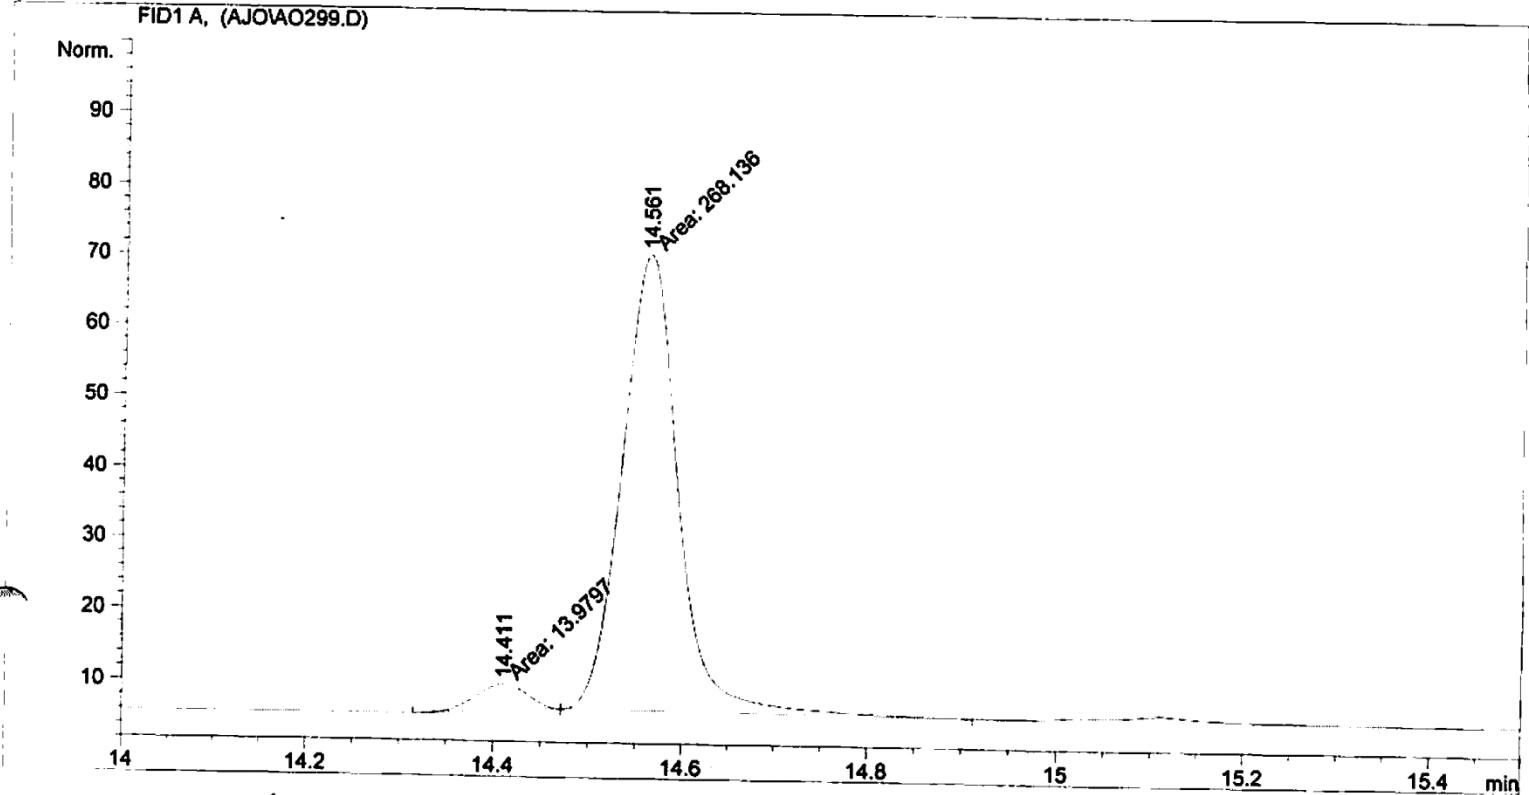

=====  
Area Percent Report  
=====

```

Sorted By      : Signal
Multiplier     : 1.0000
Dilution       : 1.0000
Use Multiplier & Dilution Factor with ISTDs
    
```

Signal 1: FID1 A,

| Peak # | RetTime [min] | Type | Width [min] | Area [pA*s] | Height [pA] | Area %   |
|--------|---------------|------|-------------|-------------|-------------|----------|
| 1      | 14.411        | MM   | 0.0634      | 13.97968    | 3.67282     | 4.95529  |
| 2      | 14.561        | MM   | 0.0696      | 268.13626   | 64.24078    | 95.04471 |

Totals :                                    282.11594    67.91359

Results obtained with enhanced integrator!

=====  
\*\*\* End of Report \*\*\*

```

=====
Injection Date   : 10/4/2011 5:56:56 PM      Seq. Line   :    1
Sample Name     :                          Location    : Vial 3
Acq. Operator   : AJO                        Inj         :    1
Acq. Instrument : Instrument 3                Inj Volume  : 1 µl
Different Inj Volume from Sequence !         Actual Inj Volume : 5 µl
Acq. Method     : C:\HPCHEM\3\METHODS\AJ0100.M
Last changed    : 10/13/2010 9:09:31 AM by AJO
Analysis Method : C:\HPCHEM\3\METHODS\RL100180.M
Last changed    : 10/17/2011 10:09:23 AM by HD
                  (modified after loading)
    
```

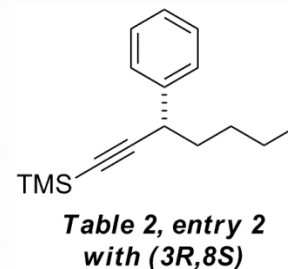

Initial test

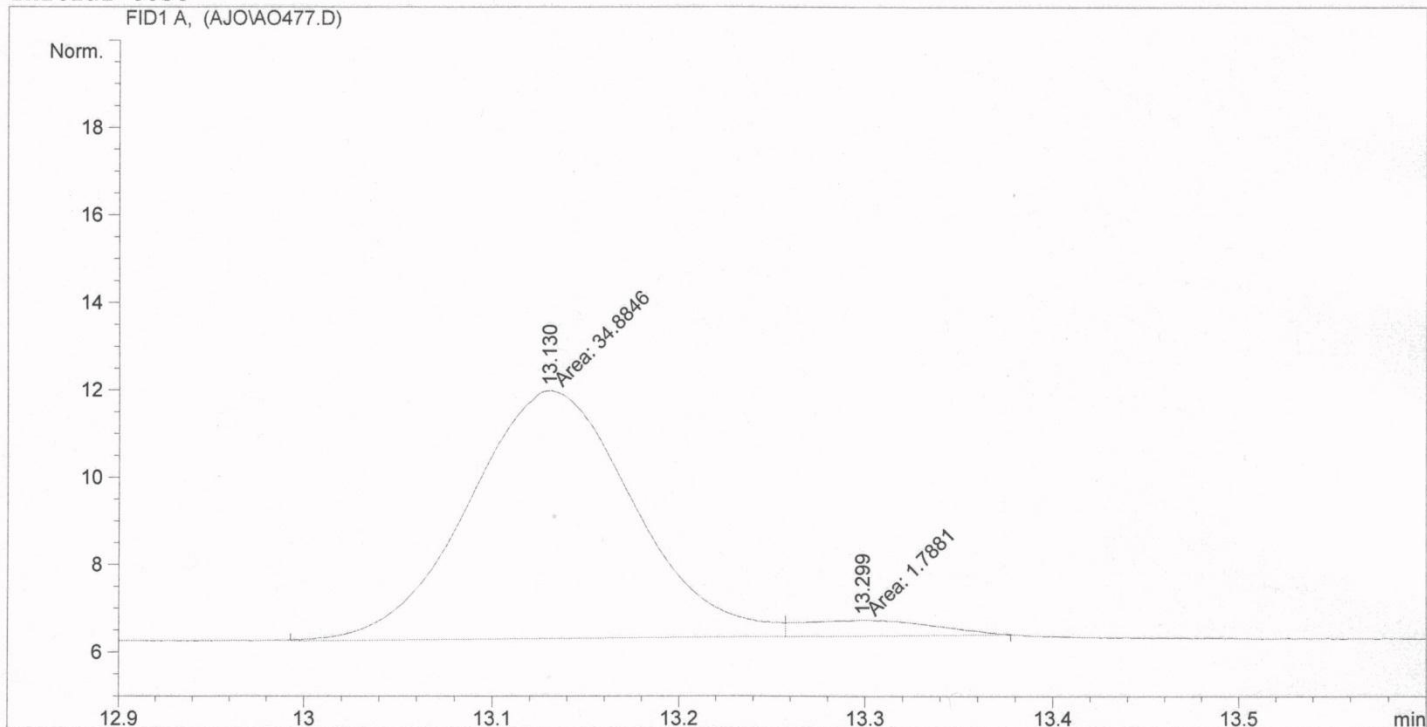

=====  
Area Percent Report  
=====

```

Sorted By      :      Signal
Multiplier     :      1.0000
Dilution       :      1.0000
Use Multiplier & Dilution Factor with ISTDs
    
```

Signal 1: FID1 A,

| Peak # | RetTime [min] | Type | Width [min] | Area [pA*s] | Height [pA] | Area %   |
|--------|---------------|------|-------------|-------------|-------------|----------|
| 1      | 13.130        | MF   | 0.1025      | 34.88464    | 5.67405     | 95.12416 |
| 2      | 13.299        | FM   | 0.0819      | 1.78810     | 3.63884e-1  | 4.87584  |

Totals :                                    36.67274    6.03793

Results obtained with enhanced integrator!

=====  
\*\*\* End of Report \*\*\*

Injection Date : 4/28/2011 5:47:40 PM  
 Sample Name : A0336A  
 Acq. Operator : NB  
 Acq. Instrument : Instrument 1  
 Different Inj Volume from Sequence : Actual Inj Volume : 15 µl  
 Inj Volume : 3 µl  
 Acq. Method : C:\HPCHEM\1\METHODS\VD-00-30.M  
 Last changed : 4/7/2011 2:46:23 AM by CC  
 Analysis Method : C:\HPCHEM\1\METHODS\VI-AD04.M  
 Last changed : 10/11/2011 3:02:56 PM by NB  
 Last changed (modified after loading)

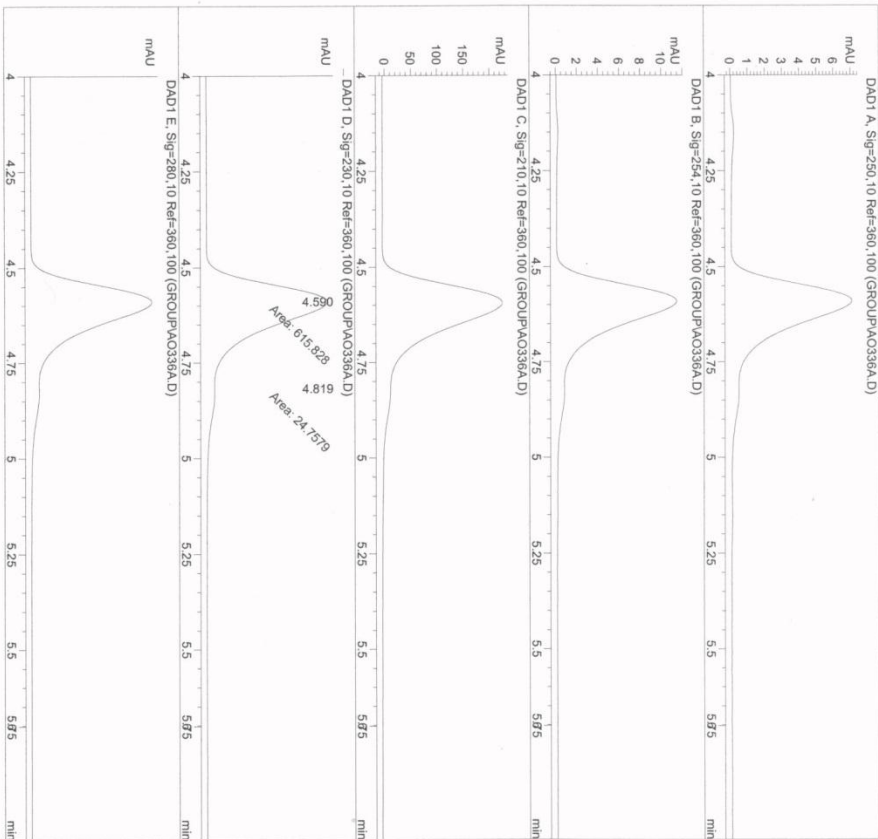

Area Percent Report

Sorted By : Signal  
 Multiplier : 1.0000  
 Dilution : 1.0000  
 Use Multiplier & Dilution Factor with ISTDs

Signal 1: DAD1 A, Sig=250,10 Ref=360,100  
 Signal 2: DAD1 B, Sig=254,10 Ref=360,100  
 Signal 3: DAD1 C, Sig=210,10 Ref=360,100  
 Signal 4: DAD1 D, Sig=230,10 Ref=360,100

| Peak #   | RetTime [min] | Type | Width [min] | Area [mAU*s] | Height [mAU] | Area %  |
|----------|---------------|------|-------------|--------------|--------------|---------|
| 1        | 4.590         | MF   | 0.1323      | 615.82849    | 77.56291     | 96.1351 |
| 2        | 4.819         | FM   | 0.0881      | 24.75788     | 4.68484      | 3.8649  |
| Totals : |               |      |             | 640.58638    | 82.24775     |         |

Results obtained with enhanced integrator!  
 Signal 5: DAD1 E, Sig=280,10 Ref=360,100  
 \*\*\* End of Report \*\*\*

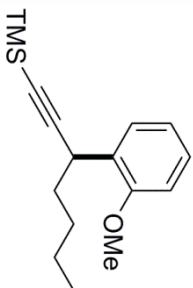

Table 2, entry 3  
 with (3S,8R)

Injection Date : 4/28/2011 6:18:59 PM  
 Sample Name : AO336B  
 Acq. Operator : NB  
 Acq. Instrument : Instrument 1  
 Different Inj Volume from Sequence : Actual Inj Volume : 15 µl  
 Inj : 1  
 Location : Vial 62  
 Inj Volume : 3 µl  
 Acq. Method : C:\HPCHEM\1\METHODS\OD-00-30.M  
 Last changed : 4/7/2011 2:46:23 AM by CC  
 Analysis Method : C:\HPCHEM\1\METHODS\VI-AD04.M  
 Last changed : 10/11/2011 3:01:29 PM by NB  
 (modified after loading)

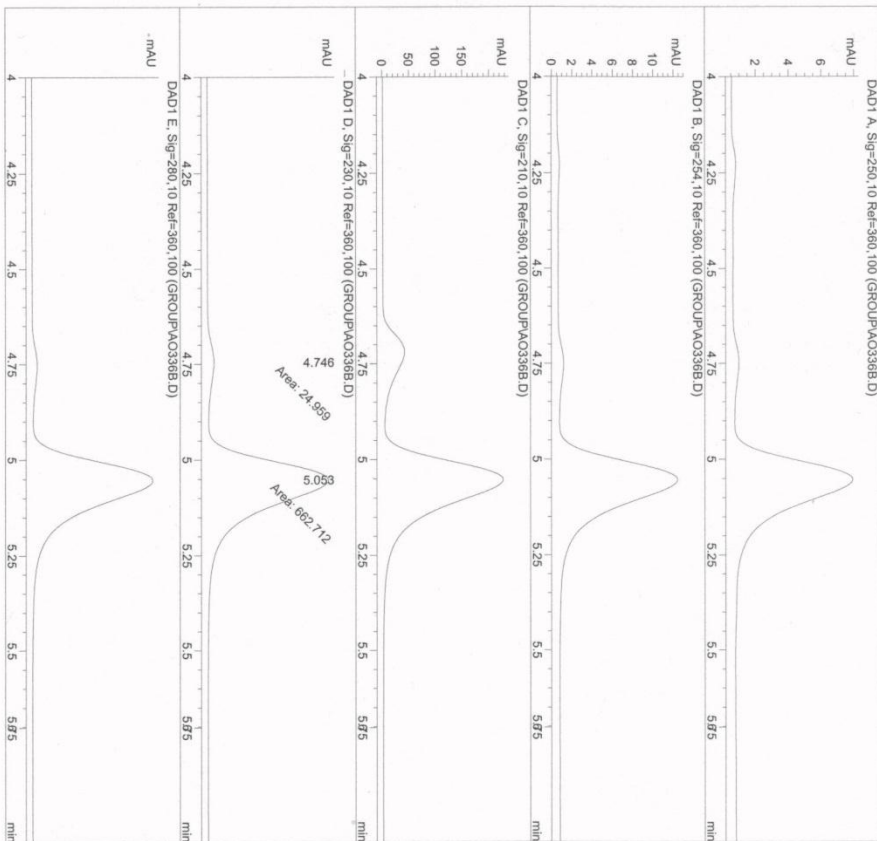

## Area Percent Report

Sorted By : Signal  
 Multiplier : 1.0000  
 Dilution : 1.0000  
 Use Multiplier & Dilution Factor with ISTDs

Signal 1: DAD1 A, Sig=250,10 Ref=360,100

Signal 2: DAD1 B, Sig=254,10 Ref=360,100

Signal 3: DAD1 C, Sig=210,10 Ref=360,100

Signal 4: DAD1 D, Sig=230,10 Ref=360,100

| Peak #   | RetTime [min] | Type | Width [min] | Area [mAU*s] | Height [mAU] | Area %  |
|----------|---------------|------|-------------|--------------|--------------|---------|
| 1        | 4.746         | MF   | 0.1184      | 24.95901     | 3.51419      | 3.6295  |
| 2        | 5.053         | FM   | 0.1395      | 682.71222    | 79.20329     | 96.3705 |
| Totals : |               |      |             | 687.67123    | 82.71748     |         |

Results obtained with enhanced integrator!

Signal 5: DAD1 E, Sig=280,10 Ref=360,100

\*\*\* End of Report \*\*\*

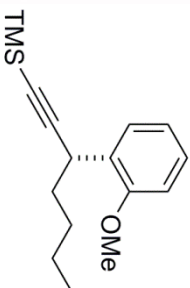

Table 2, entry 3  
 with (3R,8S)

Injection Date : 4/28/2011 6:34:46 PM  
 Sample Name : A0355A  
 Acq. Operator : NB  
 Acq. Instrument : Instrument 1  
 Different Inj Volume from Sequence : Actual Inj Volume : 15 µl  
 Inj Volume : 3 µl  
 Acq. Method : C:\HPCHEM\1\METHODS\OD-00-30.M  
 Last changed : 4/7/2011 2:46:23 AM by CC  
 Analysis Method : C:\HPCHEM\1\METHODS\YL-AD04.M  
 Last changed : 10/11/2011 3:04:57 PM by NB  
 (modified after loading)

Seq. Line : 1  
 Location : Vial 63  
 Inj : 1

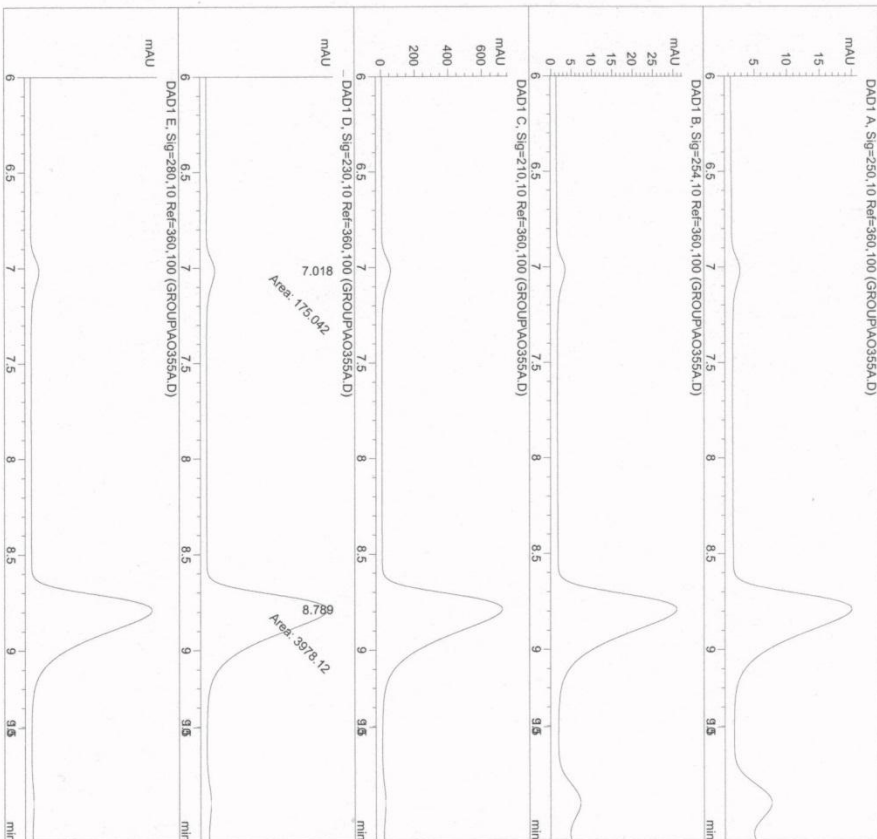

Area Percent Report

Sorted By : Signal  
 Multiplier : 1.0000  
 Dilution : 1.0000  
 Use Multiplier & Dilution Factor with ISTDs

Signal 1: DAD1 A, Sig=250,10 Ref=360,100

Signal 2: DAD1 B, Sig=254,10 Ref=360,100

Signal 3: DAD1 C, Sig=210,10 Ref=360,100

Signal 4: DAD1 D, Sig=230,10 Ref=360,100

| Peak # | RetTime [min] | Type | Width [min] | Area [mAu*s] | Height [mAu] | Area %  |
|--------|---------------|------|-------------|--------------|--------------|---------|
| 1      | 7.018         | MM   | 0.1722      | 175.04150    | 16.94658     | 4.2147  |
| 2      | 8.789         | MM   | 0.2557      | 3978.12183   | 259.32043    | 95.7853 |

Totals : 4153.16333 276.26702

Results obtained with enhanced integrator!

Signal 5: DAD1 E, Sig=280,10 Ref=360,100

\*\*\* End of Report \*\*\*

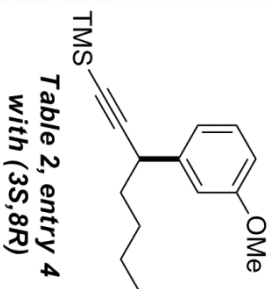

Injection Date : 4/28/2011 7:06:02 PM  
 Sample Name : AO355B  
 Acq. Operator : NB  
 Acq. Instrument : Instrument 1  
 Different Inj Volume from Sequence : Actual Inj Volume : 15 µl  
 Inj Volume : 3 µl  
 Acq. Method : C:\HPCHEM\1\METHODS\OD-00-30.M  
 Last changed : 4/7/2011 2:46:23 AM by CC  
 Analysis Method : C:\HPCHEM\1\METHODS\VI-AD004.M  
 Last changed : 10/11/2011 3:04:57 PM by NB  
 Last changed (modified after loading)

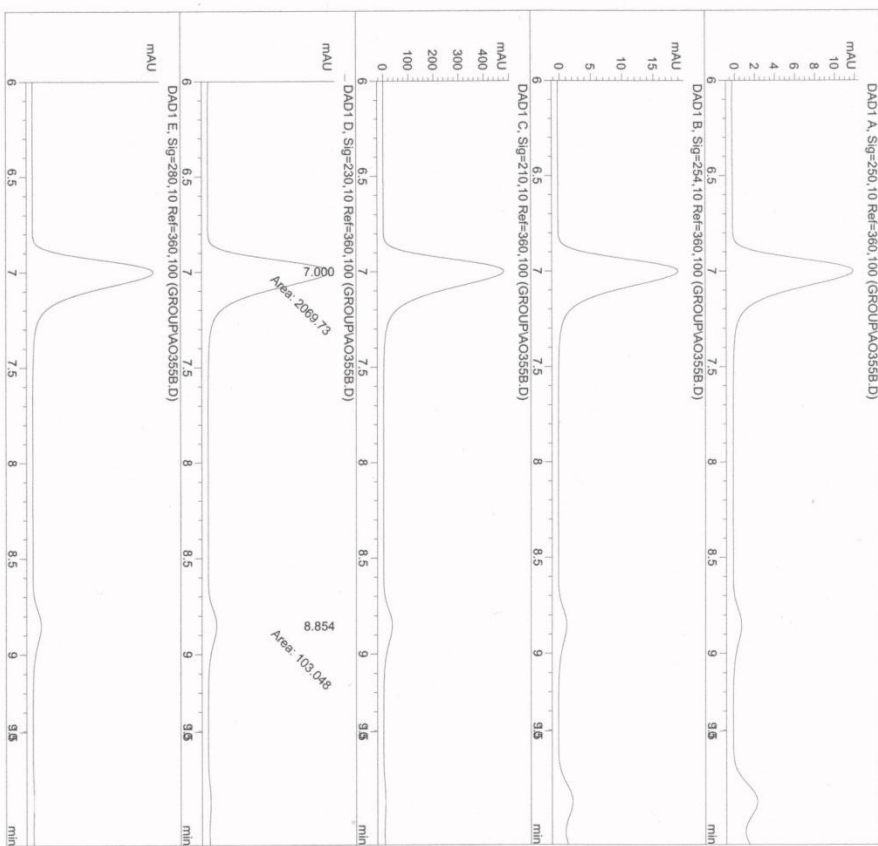

Area Percent Report

Sorted By : Signal  
 Multiplier : 1.0000  
 Dilution : 1.0000  
 Use Multiplier & Dilution Factor with ISTDs

Signal 1: DAD1 A, Sig=250,10 Ref=360,100

Signal 2: DAD1 B, Sig=254,10 Ref=360,100

Signal 3: DAD1 C, Sig=210,10 Ref=360,100

Signal 4: DAD1 D, Sig=230,10 Ref=360,100

| Peak # | RetTime [min] | Type | Width [min] | Area [mAU*s] | Height [mAU] | Area %  |
|--------|---------------|------|-------------|--------------|--------------|---------|
| 1      | 7.000         | MM   | 0.1972      | 2069.72974   | 174.89160    | 95.2573 |
| 2      | 8.854         | MM   | 0.1802      | 103.04781    | 9.53217      | 4.7427  |

Totals : 2172.77755 184.42378

Results obtained with enhanced integrator:

Signal 5: DAD1 E, Sig=280,10 Ref=360,100

\*\*\* End of Report \*\*\*

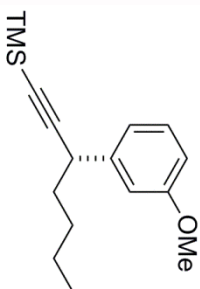

Table 2, entry 4  
 with (3R,8S)



Injection Date : 4/28/2011 7:37:17 PM  
 Sample Name : AO356A  
 Acq. Operator : NB  
 Acq. Instrument : Instrument 1  
 Different Inj Volume from Sequence : Actual Inj Volume : 15 µl  
 Acq. Method : C:\HPCHEM\1\METHODS\OD-00-30.M  
 Last changed : 4/7/2011 2:46:23 AM by CC  
 Analysis Method : C:\HPCHEM\1\METHODS\YZ-AD03.M  
 Last changed : 10/10/2011 10:20:49 AM by NB  
 (modified after loading)

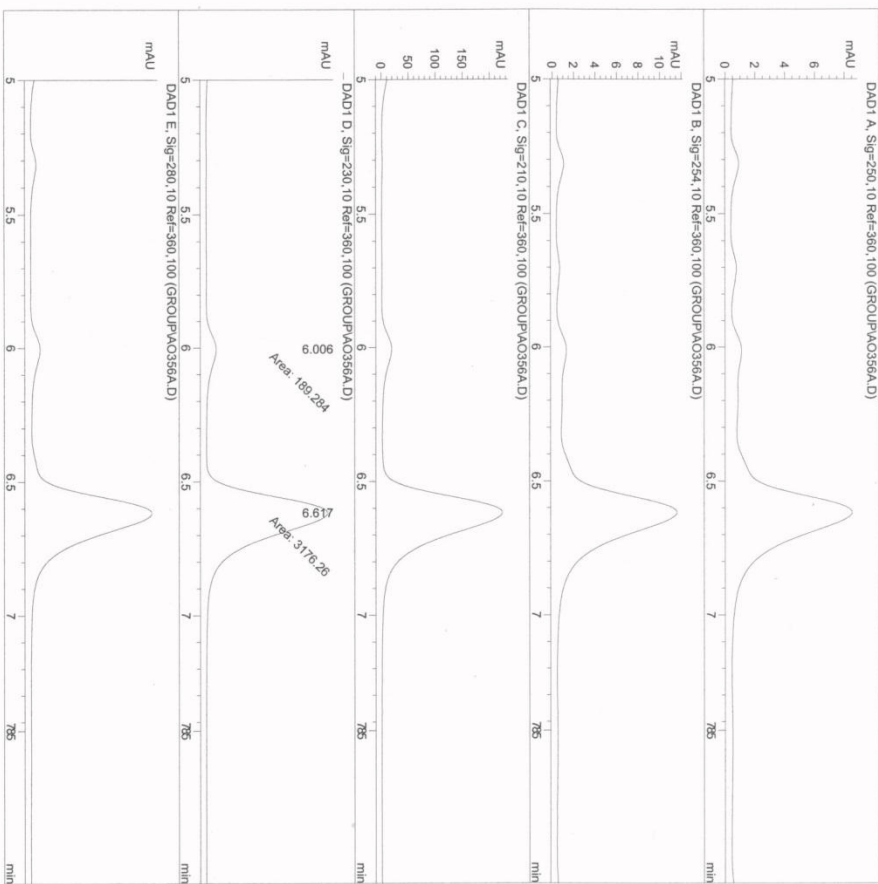

Area Percent Report  
 Sorted By : Signal  
 Multiplier : 1.0000  
 Dilution : 1.0000  
 Use Multiplier & Dilution Factor with ISTDs

| Signal                                   | RetTime [min] | Type | Width [min] | Area [mAU*s] | Height [mAU] | Area %  |
|------------------------------------------|---------------|------|-------------|--------------|--------------|---------|
| Signal 1: DAD1 A, Sig=250,10 Ref=360,100 | 6.006         | EM   | 0.1427      | 189.28445    | 22.10045     | 5.6242  |
| Signal 2: DAD1 B, Sig=254,10 Ref=360,100 | 6.617         | MM   | 0.1792      | 3176.26147   | 295.39551    | 94.3758 |
| Signal 3: DAD1 C, Sig=210,10 Ref=360,100 |               |      |             | 3365.54593   | 317.49596    |         |
| Signal 4: DAD1 D, Sig=230,10 Ref=360,100 |               |      |             |              |              |         |
| Signal 5: DAD1 E, Sig=280,10 Ref=360,100 |               |      |             |              |              |         |

Results obtained with enhanced integrator!  
 \*\*\* End of Report \*\*\*

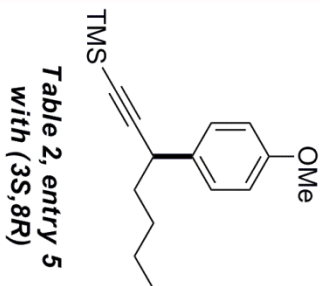

Table 2, entry 5  
 with (3S,8R)

Injection Date : 4/28/2011 8:08:33 PM      Seq. Line : 4  
 Sample Name : AO356B                              Location : Vial 66  
 Acq. Operator : NB                                Inj : 1  
 Acq. Instrument : Instrument 1                Inj Volume : 15 µl  
 Different Inj Volume from Sequence 1        Actual Inj Volume : 3 µl  
 Acq. Method : C:\HPCHEM\1\METHODS\IOP-00-30.M  
 Last changed : 4/7/2011 2:46:23 AM by CC  
 Analysis Method : C:\HPCHEM\1\METHODS\VL-AD03.M  
 Last changed : 10/10/2011 10:19:18 AM by NB  
 (modified after loading)

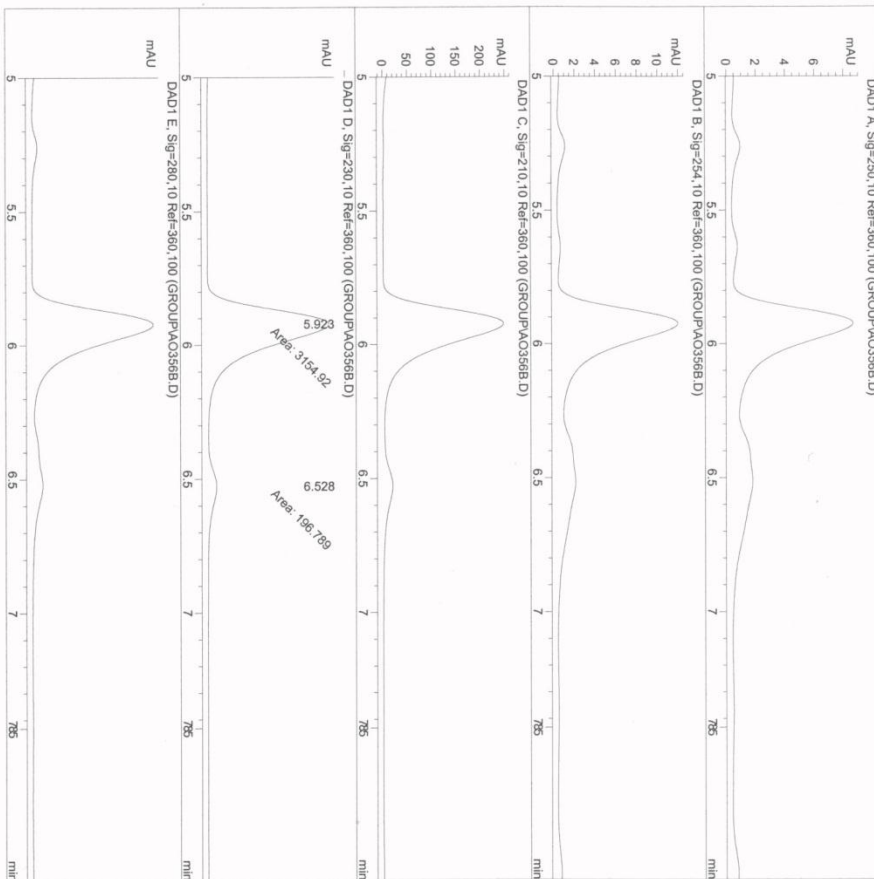

Area Percent Report

Sorted By : Signal  
 Multiplier : 1.0000  
 Dilution : 1.0000  
 Use Multiplier & Dilution Factor with ISTDs

Signal 1: DAD1 A, Sig=250,10 Ref=360,100

Signal 2: DAD1 B, Sig=254,10 Ref=360,100

Signal 3: DAD1 C, Sig=210,10 Ref=360,100

Signal 4: DAD1 D, Sig=230,10 Ref=360,100

| Peak #   | RetTime [min] | Type | Width [min] | Area [mAU*s] | Height [mAU] | Area %  |
|----------|---------------|------|-------------|--------------|--------------|---------|
| 1        | 5.923         | MM   | 0.1605      | 3154.92480   | 327.60562    | 94.1287 |
| 2        | 6.528         | MM   | 0.1555      | 196.78894    | 21.09148     | 5.8713  |
| Totals : |               |      |             | 3351.71375   | 348.69711    |         |

Results obtained with enhanced integrator!  
 Signal 5: DAD1 E, Sig=280,10 Ref=360,100

\*\*\* End of Report \*\*\*

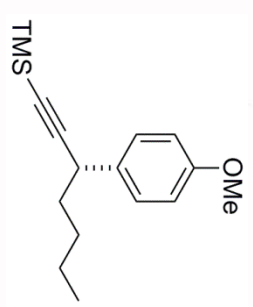

Table 2, entry 5  
 with (3R,8S)

```

=====
Injection Date   : 5/5/2011 12:37:45 PM      Seq. Line   :    1
Sample Name     :                               Location    : Vial 7
Acq. Operator  : AJO                          Inj         :    1
Acq. Instrument : Instrument 3                 Inj Volume  : 1 µl
Different Inj Volume from Sequence !         Actual Inj Volume : 3 µl
Acq. Method    : C:\HPCHEM\3\METHODS\AJO100.M
Last changed   : 10/13/2010 9:09:31 AM by AJO
Analysis Method : C:\HPCHEM\3\METHODS\RL80180.M
Last changed   : 10/10/2011 9:50:23 AM by HD
                (modified after loading)
    
```

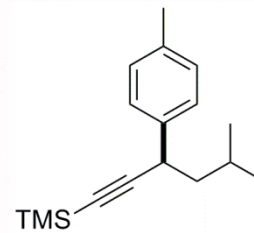

**Table 2, entry 6  
with (3S,8R)**

Initial test

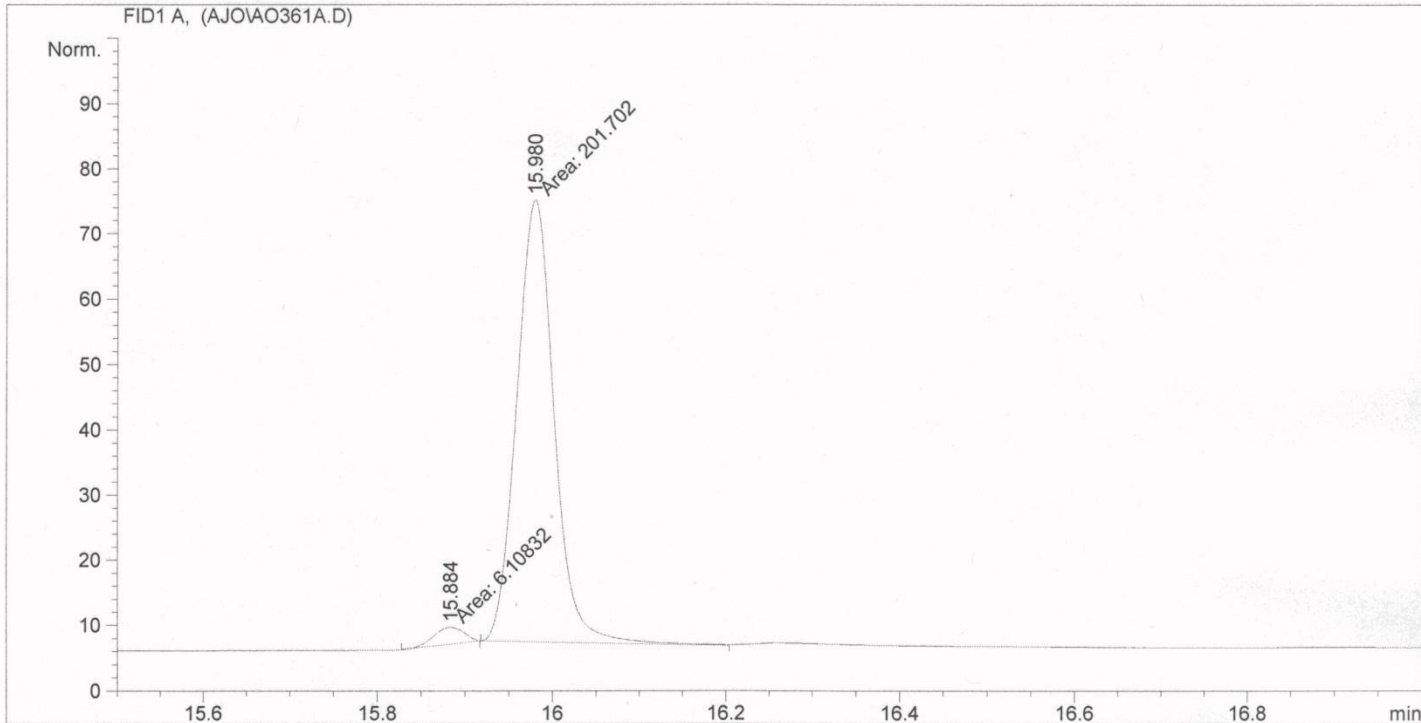

=====  
 Area Percent Report  
 =====

```

Sorted By      :      Signal
Multiplier    :      1.0000
Dilution      :      1.0000
Use Multiplier & Dilution Factor with ISTDs
    
```

Signal 1: FID1 A,

| Peak # | RetTime [min] | Type | Width [min] | Area [pA*s] | Height [pA] | Area %   |
|--------|---------------|------|-------------|-------------|-------------|----------|
| 1      | 15.884        | MM   | 0.0396      | 6.10832     | 2.56914     | 2.93937  |
| 2      | 15.980        | MM   | 0.0496      | 201.70221   | 67.73990    | 97.06063 |

Totals :                      207.81053    70.30904

Results obtained with enhanced integrator!

=====  
 \*\*\* End of Report \*\*\*

```

=====
Injection Date : 5/5/2011 1:03:41 PM      Seq. Line : 2
Sample Name   :                          Location  : Vial 8
Acq. Operator : AJO                      Inj       : 1
Acq. Instrument : Instrument 3           Inj Volume: 1 µl
Different Inj Volume from Sequence !      Actual Inj Volume: 3 µl
Acq. Method   : C:\HPCHEM\3\METHODS\AJ0100.M
Last changed  : 10/13/2010 9:09:31 AM by AJO
Analysis Method : C:\HPCHEM\3\METHODS\RL80180.M
Last changed  : 10/10/2011 9:54:41 AM by HD
                (modified after loading)
    
```

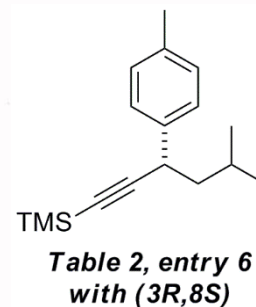

Initial test

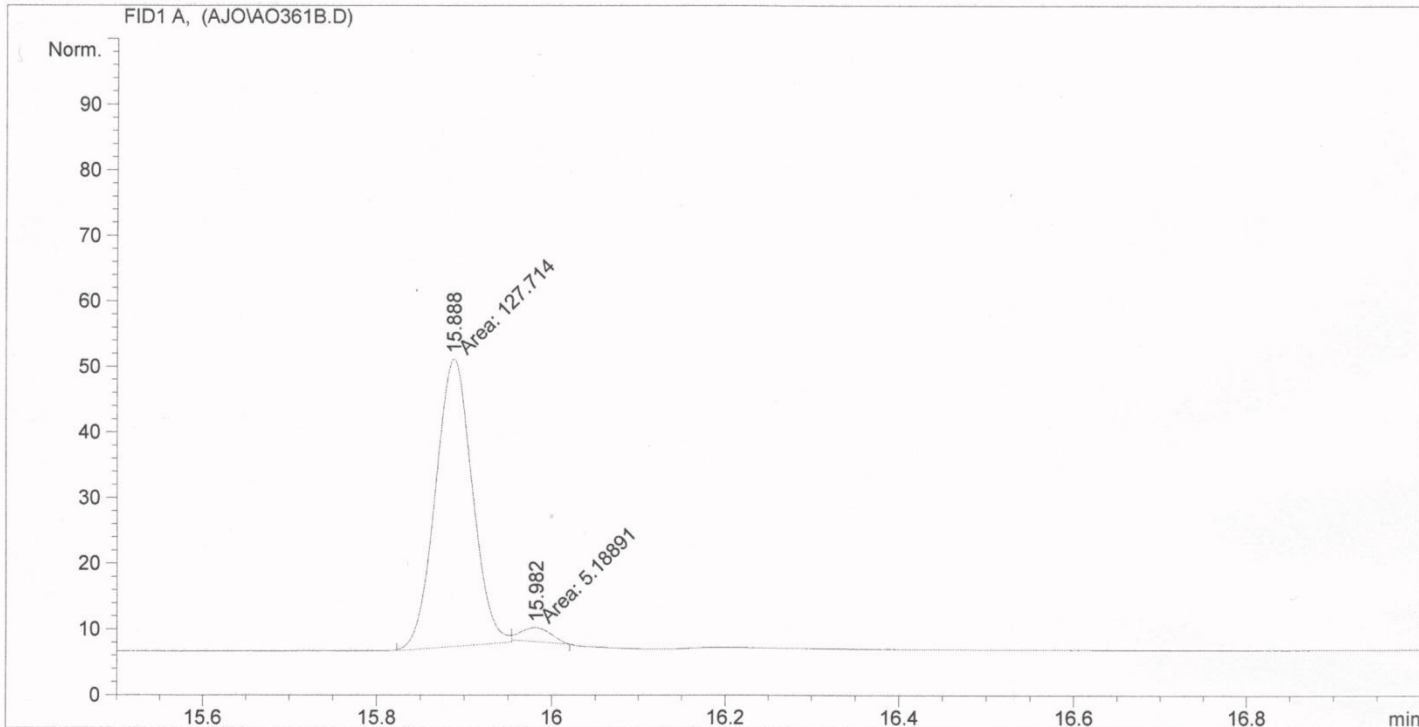

=====  
Area Percent Report  
=====

```

Sorted By      : Signal
Multiplier     : 1.0000
Dilution       : 1.0000
Use Multiplier & Dilution Factor with ISTDs
    
```

Signal 1: FID1 A,

| Peak # | RetTime [min] | Type | Width [min] | Area [pA*s] | Height [pA] | Area %   |
|--------|---------------|------|-------------|-------------|-------------|----------|
| 1      | 15.888        | MM   | 0.0486      | 127.71436   | 43.83421    | 96.09572 |
| 2      | 15.982        | MM   | 0.0399      | 5.18891     | 2.16550     | 3.90428  |

Totals : 132.90327 45.99971

Results obtained with enhanced integrator!

=====  
\*\*\* End of Report \*\*\*

Injection Date : 5/27/2011 6:47:08 PM  
 Sample Name :  
 Acq. Operator : NB  
 Acq. Instrument : Instrument 1  
 Different Inj Volume from Sequence : Actual Inj Volume : 15 µl  
 Acq. Method : C:\HPCHEM\1\METHODS\OD-01-15.M  
 Last changed : 4/20/2011 5:28:41 PM by CC  
 Analysis Method : C:\HPCHEM\1\METHODS\VI-AD004.M  
 Last changed : 10/11/2011 3:28:25 PM by NB  
 (modified after loading)

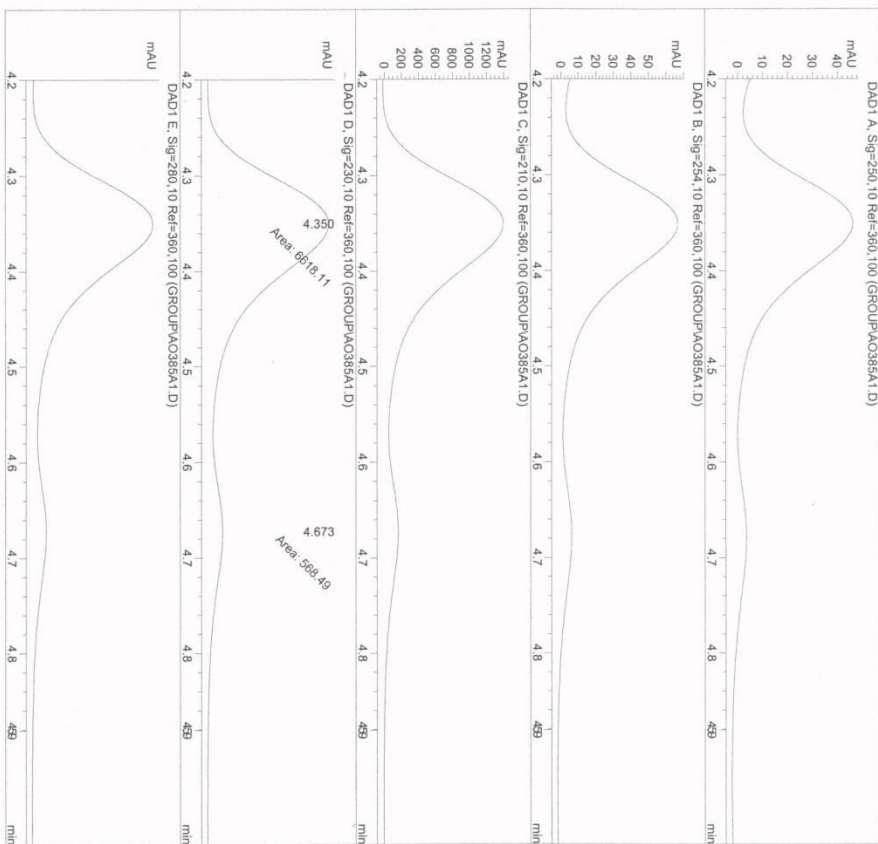

Area Percent Report  
 Sorted By : Signal  
 Multiplier : 1.0000  
 Dilution : 1.0000  
 Use Multiplier & Dilution Factor with ISTDs

Signal 1: DAD1 A, Sig=250, 10 Ref=360, 100  
 Signal 2: DAD1 B, Sig=254, 10 Ref=360, 100  
 Signal 3: DAD1 C, Sig=210, 10 Ref=360, 100  
 Signal 4: DAD1 D, Sig=230, 10 Ref=360, 100

| Peak #   | RetTime [min] | Type | Width [min] | Area [mAU*s] | Height [mAU] | Area %  |
|----------|---------------|------|-------------|--------------|--------------|---------|
| 1        | 4.350         | MM   | 0.1253      | 6618.1182    | 880.47015    | 92.0896 |
| 2        | 4.673         | MM   | 0.1172      | 568.49048    | 80.87708     | 7.9104  |
| Totals : |               |      |             | 7186.60229   | 961.34724    |         |

Results obtained with enhanced integrator!  
 Signal 5: DAD1 E, Sig=280, 10 Ref=360, 100

\*\*\* End of Report \*\*\*

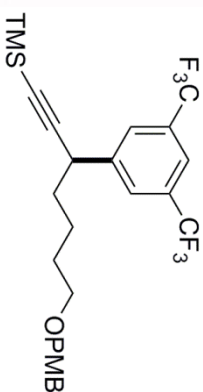

Table 2, entry 7  
 with (3S,8R)

Injection Date : 5/27/2011 7:03:24 PM  
 Sample Name :  
 Acq. Operator : NB  
 Acq. Instrument : Instrument 1  
 Different Inj Volume from Sequence : Actual Inj Volume : 15 µl  
 Acq. Method : C:\HPCHEM\1\METHODS\OD-01-15.M  
 Last changed : 4/20/2011 5:28:41 PM by CC  
 Analysis Method : C:\HPCHEM\1\METHODS\VI-AD04.M  
 Last changed : 10/11/2011 3:26:33 PM by NB  
 Last changed (modified after loading)

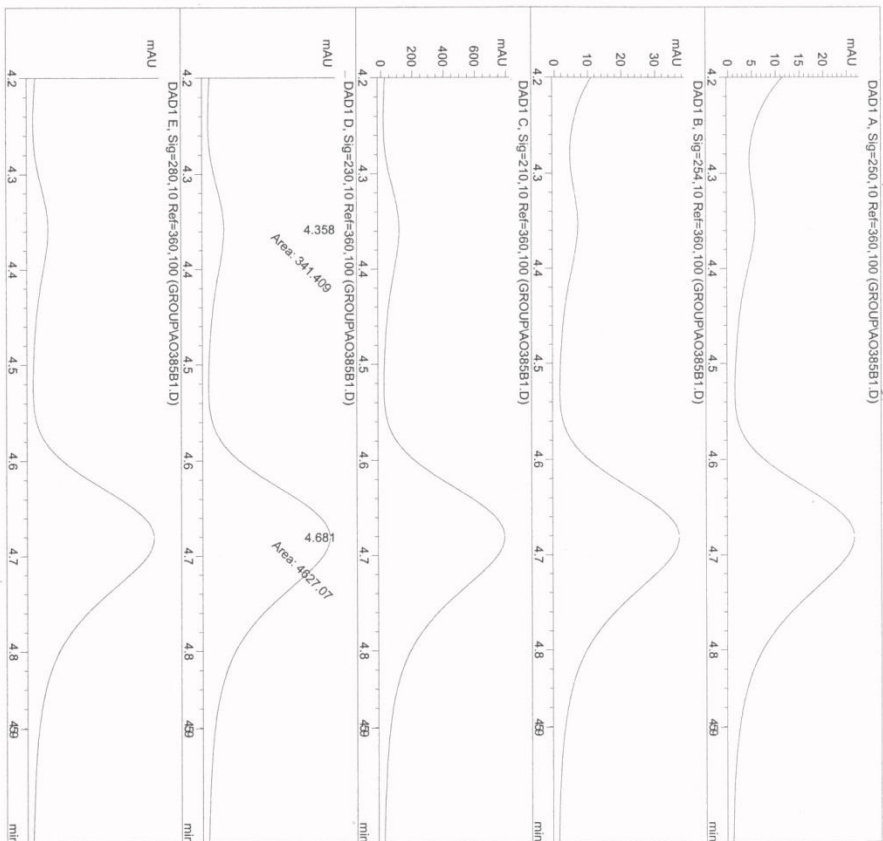

Area Percent Report  
 Sorted By : Signal  
 Multiplier : 1.0000  
 Dilution : 1.0000  
 Use Multiplier & Dilution Factor with ISTDs

Signal 1: DAD1 A, Sig=250, 10 Ref=360, 100  
 Signal 2: DAD1 B, Sig=254, 10 Ref=360, 100  
 Signal 3: DAD1 C, Sig=210, 10 Ref=360, 100  
 Signal 4: DAD1 D, Sig=230, 10 Ref=360, 100

| Peak #   | RetTime [min] | Type | Width [min] | Area [mAU*s] | Height [mAU] | Area %  |
|----------|---------------|------|-------------|--------------|--------------|---------|
| 1        | 4.358         | MM   | 0.1017      | 341.40915    | 55.92992     | 6.8715  |
| 2        | 4.681         | MM   | 0.1534      | 4627.07080   | 502.83765    | 93.1285 |
| Totals : |               |      |             | 4968.47995   | 558.76757    |         |

Results obtained with enhanced integrator:  
 Signal 5: DAD1 E, Sig=280, 10 Ref=360, 100

\*\*\* End of Report \*\*\*

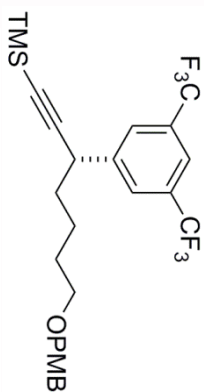

Table 2, entry 7  
 with (3R,8S)

Injection Date : 6/8/2011 1:07:17 AM  
 Sample Name :  
 Acq. Operator : NB  
 Acq. Instrument : Instrument 1  
 Different Inj Volume from Sequence : Actual Inj Volume : 1 µl  
 Inj Volume : 2 µl  
 Acq. Method : C:\HPCHEM\1\METHODS\OD-00360.M  
 Last changed : 5/28/2011 2:14:00 PM by NB  
 Analysis Method : C:\HPCHEM\1\METHODS\YL-AD04.M  
 Last changed : 10/11/2011 3:09:30 PM by NB  
 (modified after loading)

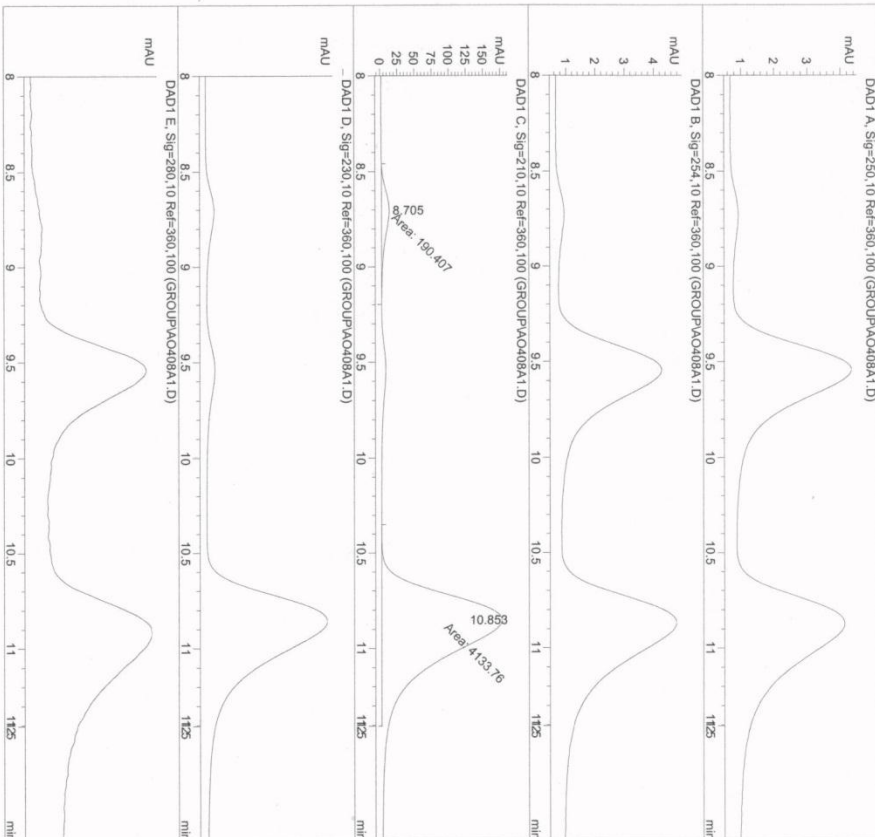

Area Percent Report  
 Sorted By : Signal  
 Multiplier : 1.0000  
 Dilution : 1.0000  
 Use Multiplier & Dilution Factor with ISTDs

| Signal                                   | RetTime [min] | Type | Width [min] | Area [mAU*s] | Height [mAU] | Area %  |
|------------------------------------------|---------------|------|-------------|--------------|--------------|---------|
| Signal 1: DAD1 A, Sig=250,10 Ref=360,100 | 8.705         | MM   | 0.2860      | 190.40735    | 11.09406     | 4.4033  |
| Signal 2: DAD1 B, Sig=254,10 Ref=360,100 | 10.853        | MM   | 0.3925      | 4133.76270   | 175.54211    | 95.5967 |
| Totals :                                 |               |      |             | 4324.17004   | 186.63617    |         |

Results obtained with enhanced integrator:  
 Signal 4: DAD1 D, Sig=230,10 Ref=360,100  
 Signal 5: DAD1 E, Sig=280,10 Ref=360,100  
 \*\*\* End of Report \*\*\*

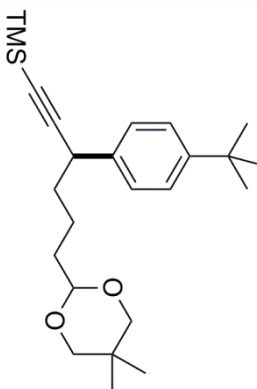

Table 2, entry 8  
 With (3S,8R)

Injection Date : 6/8/2011 2:08:31 AM  
 Sample Name :  
 Acq. Operator : NB  
 Acq. Instrument : Instrument 1  
 Different Inj Volume from Sequence : Actual Inj Volume : 1 pl  
 Acq. Method : C:\HPCHEM\1\METHODS\OD-00360.M  
 Last changed : C:\HPCHEM\1\METHODS\VI-AD04.M  
 Analysis Method : 10/11/2011 3:11:18 PM By NB  
 Last changed : (modified after loading)

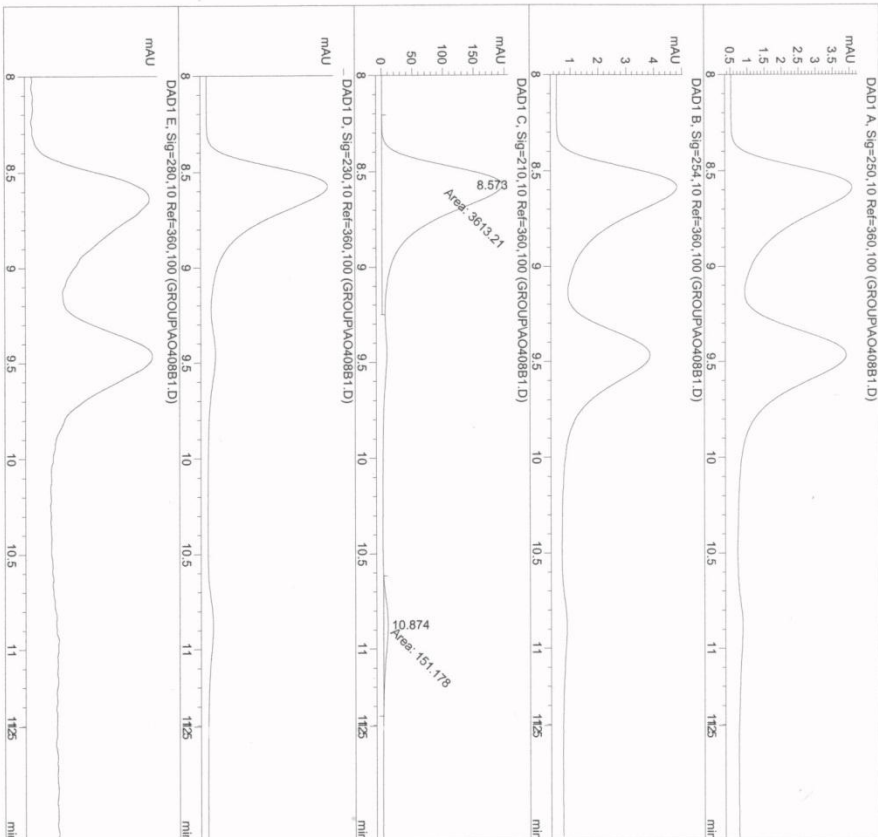

Area Percent Report  
 Sorted By : Signal  
 Multiplier : 1.0000  
 Dilution : 1.0000  
 Use Multiplier & Dilution Factor with ISTDs

Signal 1: DAD1 A, Sig=250,10 Ref=360,100

Signal 2: DAD1 B, Sig=254,10 Ref=360,100

Signal 3: DAD1 C, Sig=210,10 Ref=360,100

| Peak # | RetTime [min] | Type | Width [min] | Area [mAU*s] | Height [mAU] | Area %  |
|--------|---------------|------|-------------|--------------|--------------|---------|
| 1      | 8.573         | MF   | 0.3074      | 3613.20874   | 195.92921    | 95.9840 |
| 2      | 10.874        | MM   | 0.3393      | 151.17828    | 7.42600      | 4.0160  |

Totals : 3764.38702 203.35521

Results obtained with enhanced integrator:

Signal 4: DAD1 D, Sig=230,10 Ref=360,100

Signal 5: DAD1 E, Sig=280,10 Ref=360,100

\*\*\* End of Report \*\*\*

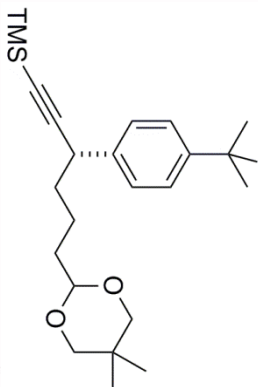

Table 2, entry 8  
 with (3R,8S)



Injection Date : 5/29/2011 8:37:38 AM  
 Sample Name :  
 Acq. Operator : NB  
 Acq. Instrument : Instrument 1  
 Different Inj Volume from Sequence : Actual Inj Volume : 15 µl  
 Acq. Method : C:\HPCHEM\1\METHODS\IB-00-60.M  
 Last changed : 4/7/2011 8:01:54 PM by CC  
 Analysis Method : C:\HPCHEM\1\METHODS\OC-02-20.M  
 Last changed : 10/11/2011 10:00:59 AM by NB  
 (modified after loading)

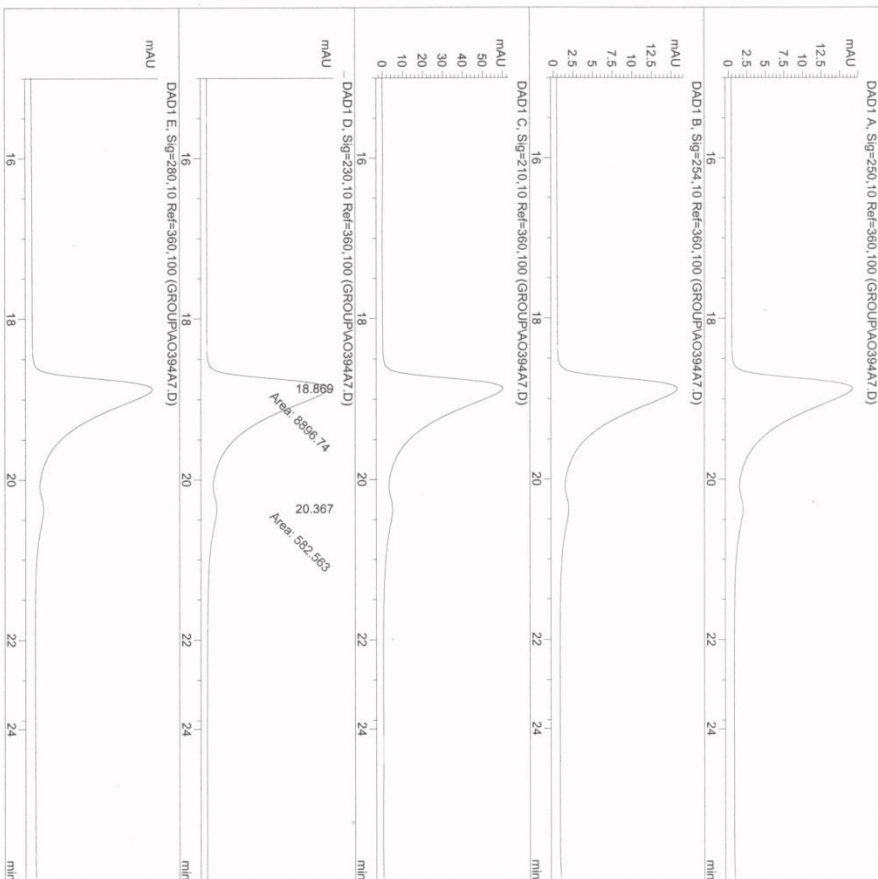

Area Percent Report  
 Sorted By : Signal  
 Multiplier : 1.0000  
 Dilution : 1.0000  
 Use Multiplier & Dilution Factor with ISTDs

| Signal                                   | RetTime [min] | Type | Width [min] | Area [mAU*s] | Height [mAU] | Area %  |
|------------------------------------------|---------------|------|-------------|--------------|--------------|---------|
| Signal 1: DAD1 A, Sig=250,10 Ref=360,100 | 18.869        | MM   | 0.5689      | 8896.73828   | 260.66391    | 93.8544 |
| Signal 2: DAD1 B, Sig=254,10 Ref=360,100 | 18.869        | MM   | 0.5689      | 8896.73828   | 260.66391    | 93.8544 |
| Signal 3: DAD1 C, Sig=210,10 Ref=360,100 | 20.367        | MM   | 0.5559      | 582.56335    | 17.46569     | 6.1456  |
| Signal 4: DAD1 D, Sig=230,10 Ref=360,100 | 18.869        | MM   | 0.5689      | 8896.73828   | 260.66391    | 93.8544 |
| Signal 5: DAD1 E, Sig=280,10 Ref=360,100 | 18.869        | MM   | 0.5689      | 8896.73828   | 260.66391    | 93.8544 |
| Totals :                                 |               |      |             | 9479.30164   | 278.12960    |         |

\*\*\* End of Report \*\*\*

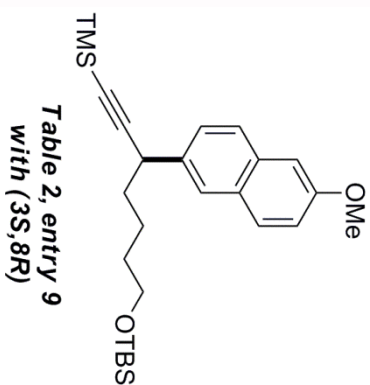

Injection Date : 5/29/2011 9:38:52 AM  
 Sample Name :  
 Acq. Operator : NB  
 Acq. Instrument : Instrument 1  
 Different Inj Volume from Sequence :  
 Inj Volume : 15 µl  
 Location : Vial 93  
 Inj : 1  
 Acq. Method : C:\HPCHEM\1\METHODS\IB-00-60.M  
 Last changed : 4/7/2011 8:01:54 PM by CC  
 Analysis Method : C:\HPCHEM\1\METHODS\07-02-20.M  
 Last changed : 10/11/2011 9:55:51 AM by NB  
 (modified after loading)

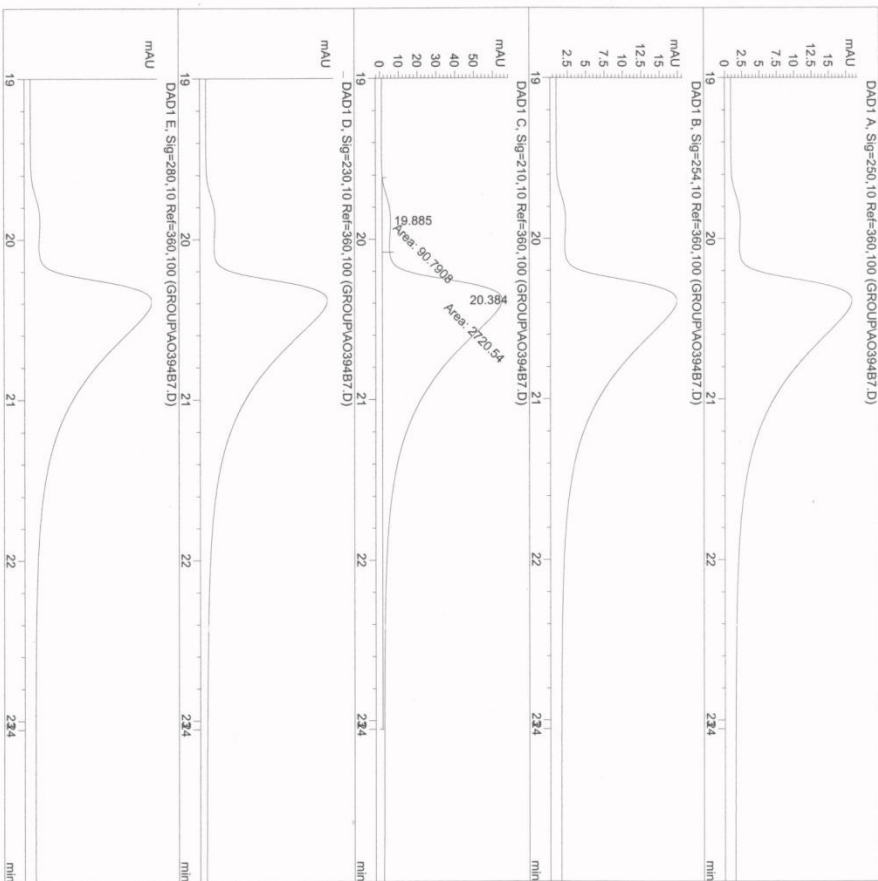

Area Percent Report  
 Sorted By : Signal  
 Multiplier : 1.0000  
 Dilution : 1.0000  
 Use Multiplier & Dilution Factor with ISTDs

| Signal                                   | RetTime | Type | Width  | Area       | Height   | Area %  |
|------------------------------------------|---------|------|--------|------------|----------|---------|
| Signal 1: DAD1 A, Sig=250,10 Ref=360,100 | 19.885  | MF   | 0.3421 | 90.79084   | 4.42354  | 3.2295  |
| Signal 2: DAD1 B, Sig=254,10 Ref=360,100 | 20.384  | FM   | 0.7119 | 2720.53564 | 63.69624 | 96.7705 |
| Totals :                                 |         |      |        | 2811.32648 | 68.11978 |         |

Results obtained with enhanced integrator!  
 Signal 4: DAD1 D, Sig=230,10 Ref=360,100  
 Signal 5: DAD1 E, Sig=280,10 Ref=360,100  
 \*\*\* End of Report \*\*\*

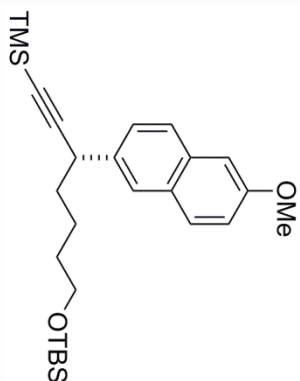

Table 2, entry 9  
 with (3R,8S)

Injection Date : 5/24/2011 3:24:42 PM  
 Sample Name :  
 Acq. Operator : NB  
 Acq. Instrument : Instrument 1  
 Different Inj Volume from Sequence : Actual Inj Volume : 15 µl  
 Acq. Method : C:\HPCHEM\1\METHODS\NOD-00-40.M  
 Last changed : 6/3/2005 8:24:08 PM by GROUP  
 Analysis Method : C:\HPCHEM\1\METHODS\YL-AD04.M  
 Last changed : 10/11/2011 3:11:27 PM by NB  
 (modified after loading)

Seq. Line : 2  
 Location : Vial 1  
 Inj : 1  
 Inj Volume : 1 µl

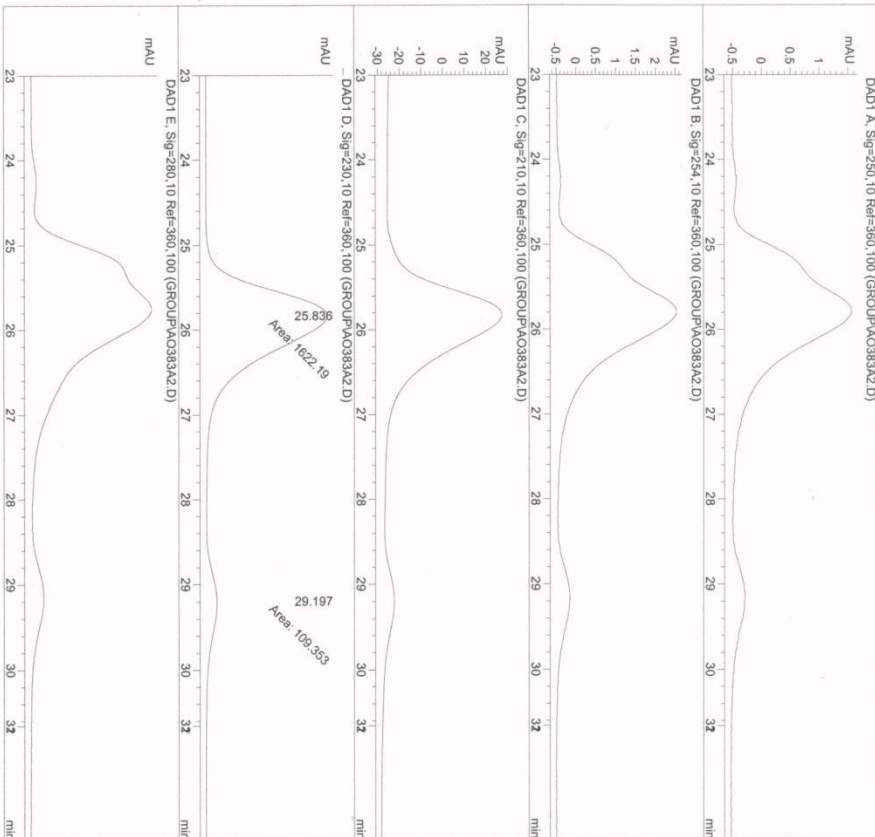

Area Percent Report

Sorted By : Signal  
 Multiplier : 1.0000  
 Dilution : 1.0000  
 Use Multiplier & Dilution Factor with ISTDs

Signal 1: DAD1 A, Sig=250,10 Ref=360,100

Signal 2: DAD1 B, Sig=254,10 Ref=360,100

Signal 3: DAD1 C, Sig=210,10 Ref=360,100

Signal 4: DAD1 D, Sig=230,10 Ref=360,100

| Peak # | RetTime [min] | Type | Width [min] | Area [mAU*s] | Height [mAU] | Area %  |
|--------|---------------|------|-------------|--------------|--------------|---------|
| 1      | 25.836        | MM   | 0.8808      | 1622.18762   | 30.69631     | 93.6847 |
| 2      | 29.197        | MM   | 0.7686      | 109.35281    | 2.37139      | 6.3153  |

Totals : 1731.54043 33.06769

Results obtained with enhanced integrator!

Signal 5: DAD1 E, Sig=280,10 Ref=360,100

\*\*\* End of Report \*\*\*

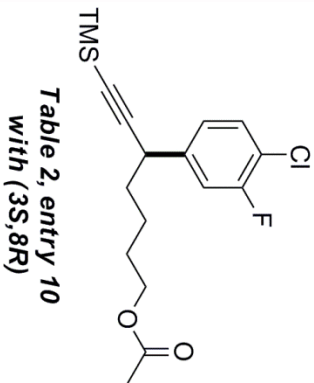

Injection Date : 5/24/2011 4:05:54 PM  
 Sample Name :  
 Acq. Operator : NB  
 Acq. Instrument : Instrument 1  
 Different Inj Volume from Sequence : Actual Inj Volume : 15 µl  
 Acq. Method : C:\HPCHEM\1\METHODS\OD-00-40.M  
 Last changed : 6/3/2005 8:24:08 PM by GROUP  
 Analysis Method : C:\HPCHEM\1\METHODS\YL-AD04.M  
 Last changed : 10/11/2011 3:21:24 PM by NB  
 (modified after loading)

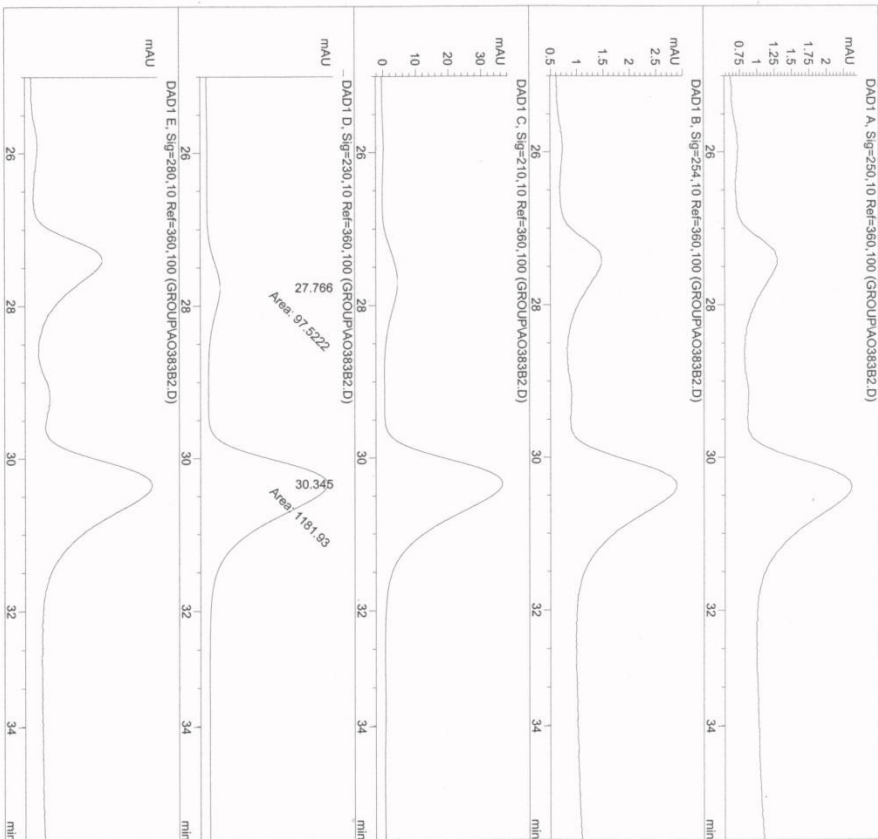

Area Percent Report  
 Sorted By : Signal  
 Multiplier : 1.0000  
 Dilution : 1.0000  
 Use Multiplier & Dilution Factor with ISTDs

Signal 1: DAD1 A, Sig=250,10 Ref=360,100  
 Signal 2: DAD1 B, Sig=254,10 Ref=360,100  
 Signal 3: DAD1 C, Sig=210,10 Ref=360,100  
 Signal 4: DAD1 D, Sig=230,10 Ref=360,100

| Peak #   | RetTime [min] | Type | Width [min] | Area [mAU*s] | Height [mAU] | Area %  |
|----------|---------------|------|-------------|--------------|--------------|---------|
| 1        | 27.766        | MM   | 0.7914      | 97.52222     | 2.05370      | 7.6222  |
| 2        | 30.345        | MM   | 0.9437      | 1181.93335   | 20.87317     | 92.3778 |
| Totals : |               |      |             | 1279.45557   | 22.92687     |         |

Results obtained with enhanced integrator!  
 Signal 5: DAD1 E, Sig=280,10 Ref=360,100

\*\*\* End of Report \*\*\*

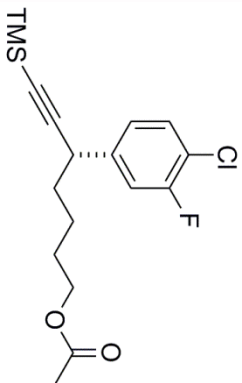

Table 2, entry 10  
 with (3R,8S)

```

=====
Injection Date   : 5/3/2011 4:51:37 PM           Seq. Line   :    3
Sample Name     :                               Location    : Vial 9
Acq. Operator   : AJ0                           Inj         :    1
                                                    Inj Volume  : 1 µl

Acq. Method     : D:\HPCHEM\2\METHODS\100280B.M
Last changed    : 12/18/2010 1:41:19 PM by AJ0
Analysis Method : D:\HPCHEM\2\METHODS\100310L.M
Last changed    : 10/10/2011 9:37:30 AM by YL
                (modified after loading)
=====

```

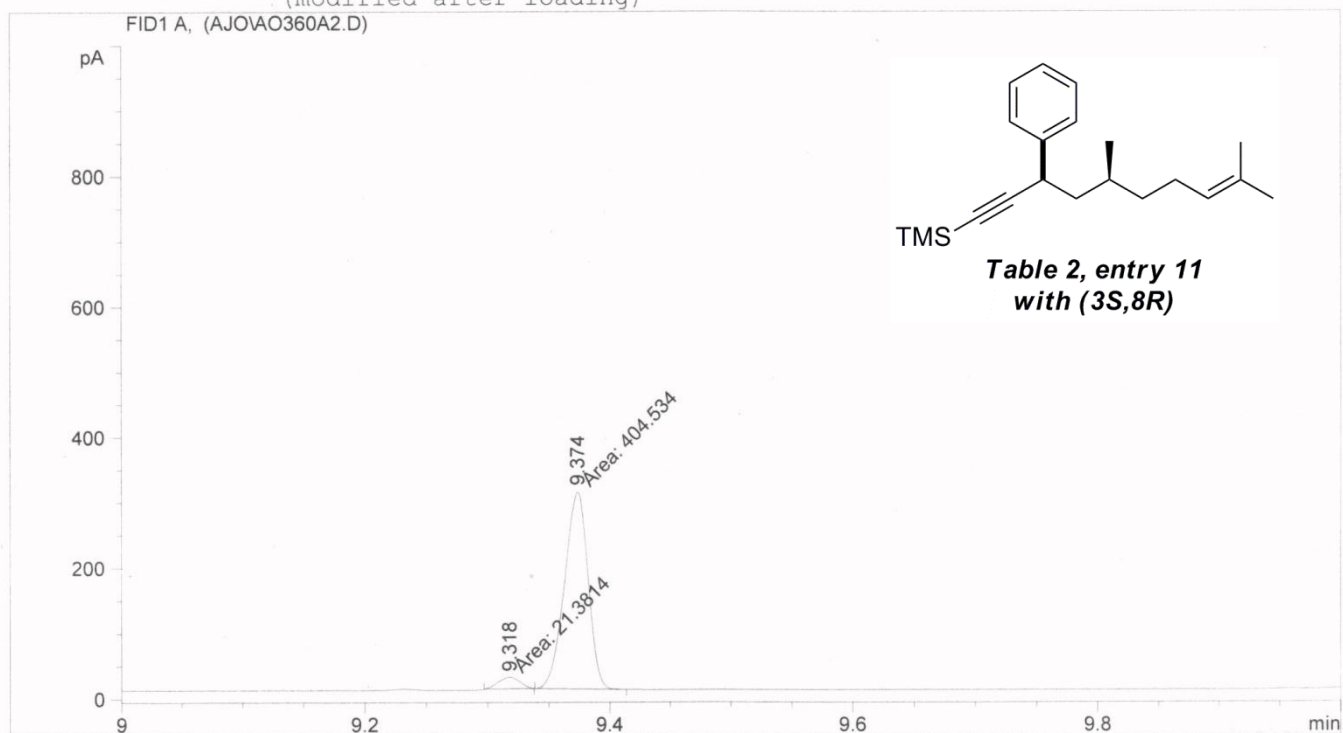

```

=====
Area Percent Report
=====

```

```

Sorted By      :      Signal
Multiplier     :      1.0000
Dilution      :      1.0000
Use Multiplier & Dilution Factor with ISTDs

```

Signal 1: FID1 A,

| Peak # | RetTime [min] | Type | Width [min] | Area [pA*s] | Height [pA] | Area %   |
|--------|---------------|------|-------------|-------------|-------------|----------|
| 1      | 9.318         | MM   | 0.0205      | 21.38142    | 17.41595    | 5.02011  |
| 2      | 9.374         | MM   | 0.0223      | 404.53354   | 301.80872   | 94.97989 |

```
Totals :                425.91496  319.22466
```

Results obtained with enhanced integrator!

```

=====
*** End of Report ***
=====

```

```

=====
Injection Date : 5/3/2011 5:14:30 PM      Seq. Line : 4
Sample Name    :                          Location  : Vial 10
Acq. Operator  : AJ0                      Inj       : 1
                                           Inj Volume: 1 µl

Acq. Method    : D:\HPCHEM\2\METHODS\100280B.M
Last changed   : 12/18/2010 1:41:19 PM by AJ0
Analysis Method : D:\HPCHEM\2\METHODS\100310L.M
Last changed   : 10/10/2011 9:38:23 AM by YL
                (modified after loading)
    
```

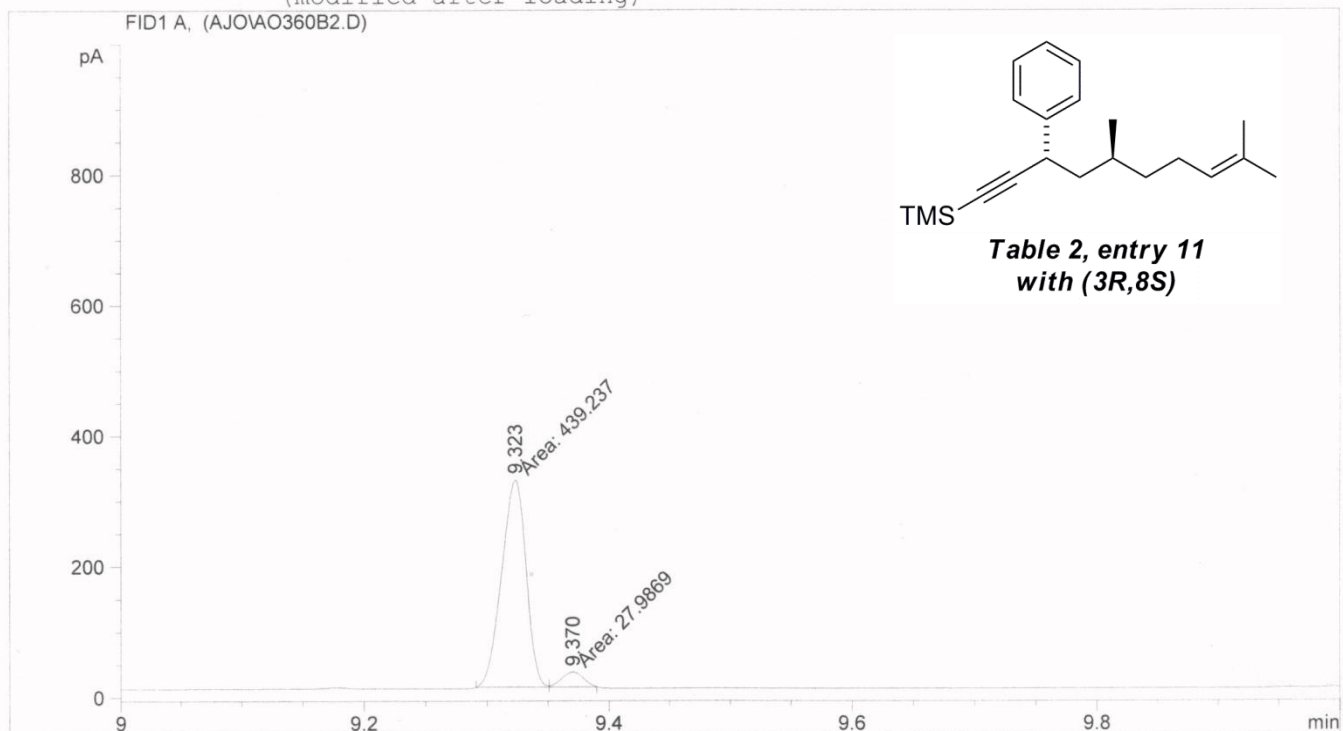

Area Percent Report

```

=====
Sorted By      : Signal
Multiplier     : 1.0000
Dilution      : 1.0000
Use Multiplier & Dilution Factor with ISTDs
    
```

Signal 1: FID1 A,

| Peak # | RetTime [min] | Type | Width [min] | Area [pA*s] | Height [pA] | Area %   |
|--------|---------------|------|-------------|-------------|-------------|----------|
| 1      | 9.323         | MF   | 0.0231      | 439.23700   | 316.74741   | 94.00995 |
| 2      | 9.370         | FM   | 0.0204      | 27.98693    | 22.82645    | 5.99005  |

Totals : 467.22393 339.57385

Results obtained with enhanced integrator!

\*\*\* End of Report \*\*\*

Injection Date : 6/7/2011 9:40:42 PM  
 Sample Name :  
 Acq. Operator : NB  
 Acq. Instrument : Instrument 1  
 Different Inj Volume from Sequence : Actual Inj Volume : 15 µl  
 Inj Volume : 2 µl  
 Acq. Method : C:\HPCHEM\1\METHODS\OD-00-50.M  
 Last changed : 4/17/2009 9:17:30 PM by GROUP  
 Analysis Method : C:\HPCHEM\1\METHODS\YL-AD04.M  
 Last changed : 10/11/2011 3:14:51 PM by NB  
 (modified after loading)

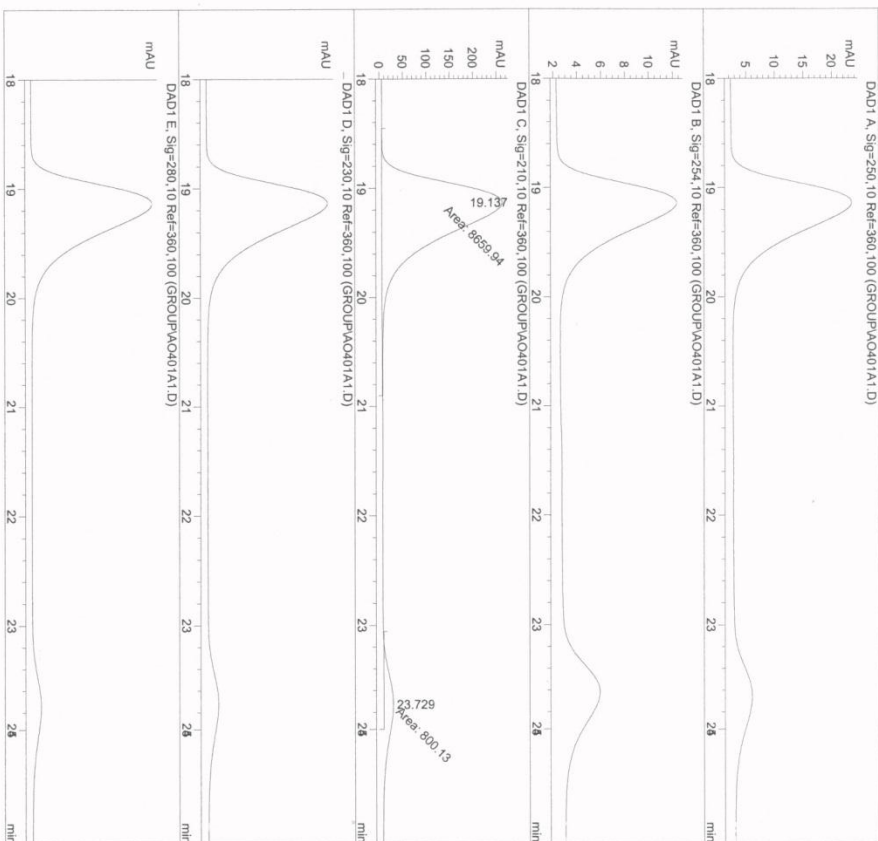

Area Percent Report  
 Sorted By : Signal  
 Multiplier : 1.0000  
 Dilution : 1.0000  
 Use Multiplier & Dilution Factor with ISTDs

| Signal                                   | RetTime [min] | Type | Width [min] | Area [mAU*s] | Height [mAU] | Area %  |
|------------------------------------------|---------------|------|-------------|--------------|--------------|---------|
| Signal 1: DAD1 A, Sig=250,10 Ref=360,100 | 19.137        | MM   | 0.5615      | 8659.93848   | 257.07010    | 91.5420 |
| Signal 2: DAD1 B, Sig=254,10 Ref=360,100 | 23.729        | MM   | 0.6642      | 800.12970    | 20.07790     | 8.4580  |
| Totals :                                 |               |      |             | 9460.06818   | 277.14800    |         |

Results obtained with enhanced integrator!

Signal 4: DAD1 D, Sig=230,10 Ref=360,100

\*\*\* End of Report \*\*\*

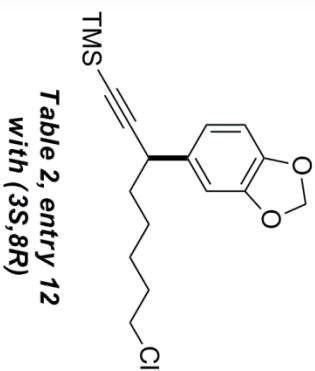

Table 2, entry 12  
 with (3S,8R)

Injection Date : 6/7/2011 10:31:53 PM  
 Sample Name :  
 Acq. Operator : NB  
 Acq. Instrument : Instrument 1  
 Different Inj Volume from Sequence : Actual Inj Volume : 15 µl  
 Inj : 1  
 Inj Volume : 2 µl  
 Acq. Method : C:\HPCHEM\1\METHODS\OD-00-50.M  
 Last changed : 4/17/2009 9:17:30 PM by GROUP  
 Analysis Method : C:\HPCHEM\1\METHODS\YL-AD04.M  
 Last changed : 10/11/2011 3:12:39 PM by NB  
 (modified after loading)

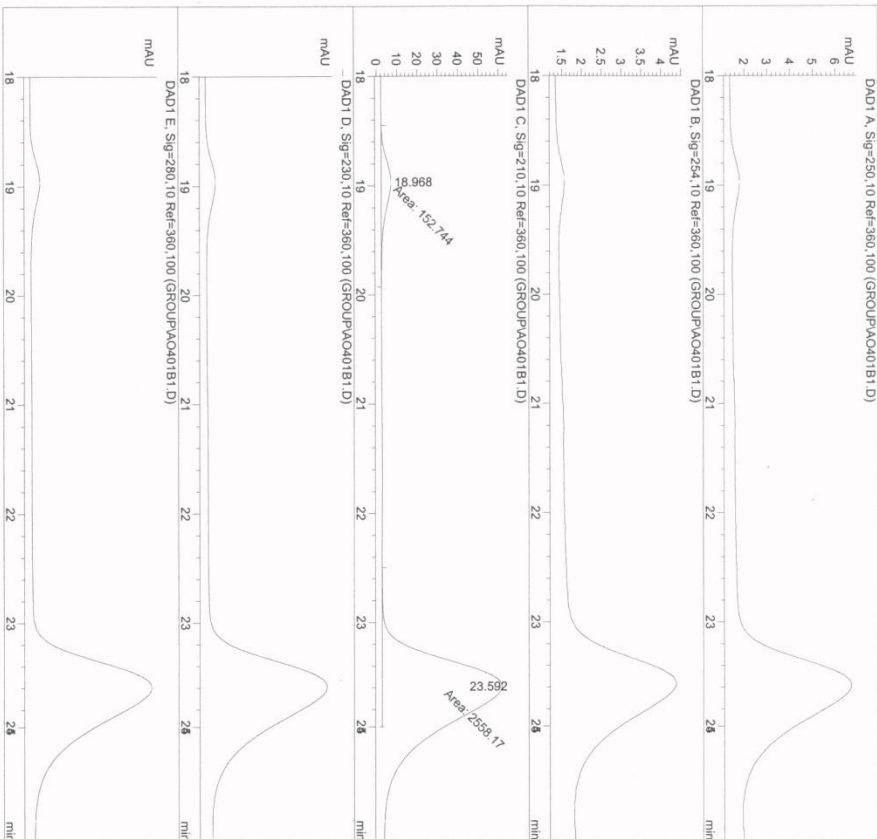

Area Percent Report  
 Sorted By : Signal  
 Multiplier : 1.0000  
 Dilution : 1.0000  
 Use Multiplier & Dilution Factor with ISTDs

| Signal                                   | RetTime [min] | Type | Width [min] | Area [mAU*s] | Height [mAU] | Area %  |
|------------------------------------------|---------------|------|-------------|--------------|--------------|---------|
| Signal 1: DAD1 A, Sig=250,10 Ref=360,100 | 18.968        | MM   | 0.5335      | 152.74353    | 4.77174      | 5.6344  |
| Signal 2: DAD1 B, Sig=254,10 Ref=360,100 | 23.592        | MM   | 0.7236      | 2558.17041   | 58.92229     | 94.3656 |
| Signal 3: DAD1 C, Sig=210,10 Ref=360,100 |               |      |             | 2710.91394   | 63.69403     |         |

Totals : 2710.91394 63.69403

Results obtained with enhanced integrator:

Signal 4: DAD1 D, Sig=230,10 Ref=360,100

Signal 5: DAD1 E, Sig=280,10 Ref=360,100

\*\*\* End of Report \*\*\*

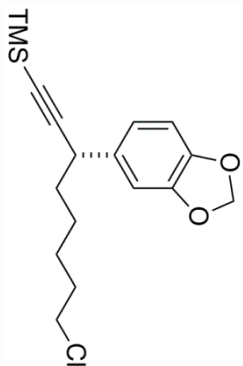

Table 2, entry 12  
 with (3R,8S)



Injection Date : 7/21/2011 5:04:40 PM  
 Sample Name :  
 Acq. Operator : NB  
 Acq. Instrument : Instrument 1  
 Different Inj Volume from Sequence 1 :  
 Acq. Method : C:\HPCHEM\1\METHODS\IP-05-60.M  
 Last Changed : 6/4/2011 9:40:33 AM by NB  
 Analysis Method : C:\HPCHEM\1\METHODS\11-AD03.M  
 Last Changed : 10/10/2011 10:09:06 AM by NB  
 (modified after loading)

Seq. Line : 72  
 Location : Vial 93  
 Inj : 1  
 Inj Volume : 15 µl  
 Actual Inj Volume : 2 µl

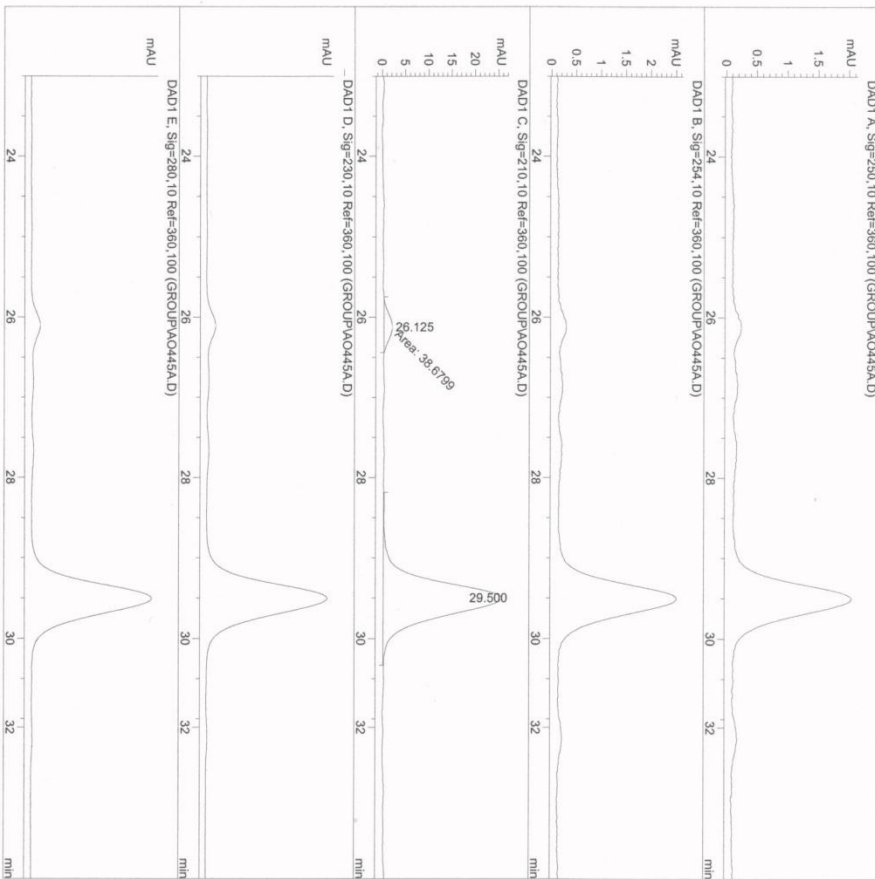

Area Percent Report

| Sorted By                                   | Signal |
|---------------------------------------------|--------|
| Multiplier                                  | 1.0000 |
| Dilution                                    | 1.0000 |
| Use Multiplier & Dilution Factor with ISTDs |        |

Signal 1: DAD1 A, Sig=250,10 Ref=360,100  
 Signal 2: DAD1 B, Sig=254,10 Ref=360,100  
 Signal 3: DAD1 C, Sig=210,10 Ref=360,100

| Peak #   | RetTime [min] | Type | Width [min] | Area [mAU*s] | Height [mAU] | Area %  |
|----------|---------------|------|-------------|--------------|--------------|---------|
| 1        | 26.125        | MM   | 0.3624      | 38.67986     | 1.77895      | 5.0488  |
| 2        | 29.500        | BB   | 0.4376      | 727.43829    | 25.44360     | 94.9512 |
| Totals : |               |      |             | 766.11815    | 27.22255     |         |

Results obtained with enhanced integrator!

Signal 4: DAD1 D, Sig=230,10 Ref=360,100  
 Signal 5: DAD1 E, Sig=280,10 Ref=360,100

\*\*\* End of Report \*\*\*

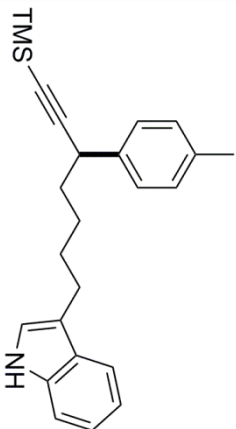

Table 2, entry 13  
 With (3S,8R)

Injection Date : 7/21/2011 6:05:58 PM  
 Sample Name :  
 Acq. Operator : NB  
 Acq. Instrument : Instrument 1  
 Diluent Inj Volume from Sequence : Actual Inj Volume : 15 µl  
 Inj Volume : 2 µl  
 Acq. Method : C:\HPCHEM\1\METHODS\IB-05-60.M  
 Last changed : 6/4/2011 9:40:33 AM by NB  
 Analysis Method : C:\HPCHEM\1\METHODS\11-AD03.M  
 Last changed : 10/10/2011 10:09:06 AM by NB  
 (modified after loading)

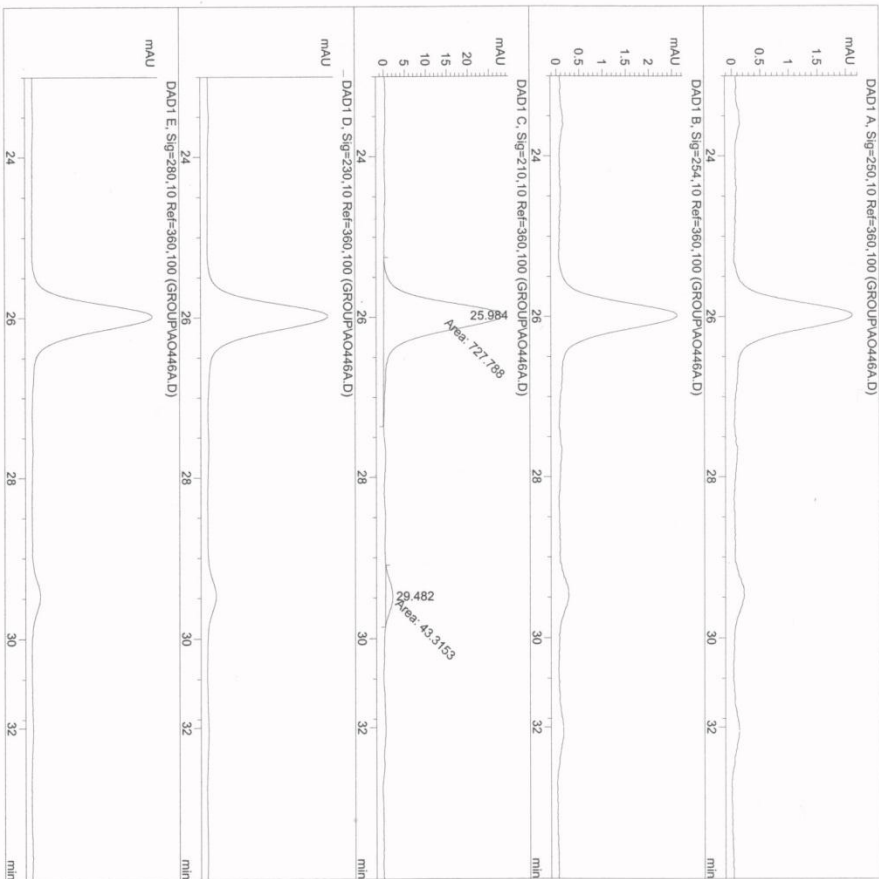

Area Percent Report  
 Sorted By : Signal  
 Multiplier : 1.0000  
 Dilution : 1.0000  
 Use Multiplier & Dilution Factor with ISTDs

| Signal                                   | RetTime [min] | Type | Width [min] | Area [mAU*s] | Height [mAU] | Area %  |
|------------------------------------------|---------------|------|-------------|--------------|--------------|---------|
| Signal 1: DAD1 A, Sig=250,10 Ref=360,100 | 25.984        | MM   | 0.4292      | 727.78833    | 28.26185     | 94.3827 |
| Signal 2: DAD1 B, Sig=254,10 Ref=360,100 | 29.482        | MM   | 0.4212      | 43.31525     | 1.71412      | 5.6173  |
| Totals :                                 |               |      |             | 771.10358    | 29.97597     |         |

Results obtained with enhanced integrator:  
 Signal 4: DAD1 D, Sig=230,10 Ref=360,100  
 Signal 5: DAD1 E, Sig=280,10 Ref=360,100  
 \*\*\* End of Report \*\*\*

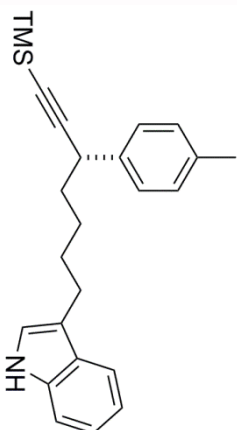

Table 2, entry 13  
 with (3R,8S)

```

=====
Injection Date   : 4/7/2011 6:46:31 PM      Seq. Line   :    1
Sample Name     :                          Location    : Vial 3
Acq. Operator  : AJO                       Inj         :    1
Acq. Instrument : Instrument 3              Inj Volume  : 1 µl
Different Inj Volume from Sequence !      Actual Inj Volume : 3 µl
Acq. Method    : C:\HPCHEM\3\METHODS\JSSS33B.M
Last changed   : 4/7/2011 4:43:53 PM by JTB
Analysis Method : C:\HPCHEM\3\METHODS\JC100200.M
Last changed   : 4/7/2011 7:22:21 PM by JTB
                (modified after loading)
=====
    
```

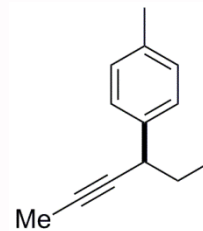

**Equation 4  
with (3S,8R)**

Initial test

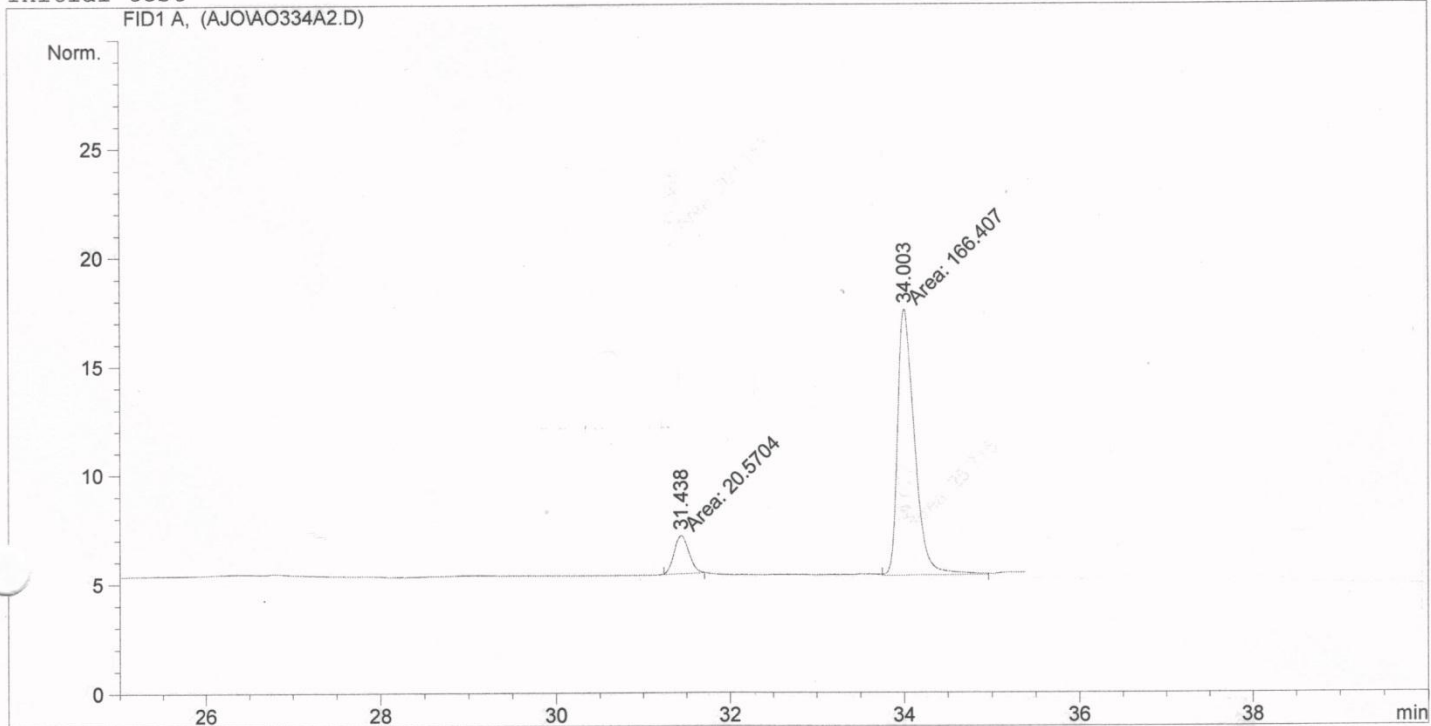

=====  
**Area Percent Report**  
 =====

```

Sorted By      :      Signal
Multiplier     :      1.0000
Dilution       :      1.0000
Use Multiplier & Dilution Factor with ISTDs
    
```

Signal 1: FID1 A,

| Peak # | RetTime [min] | Type | Width [min] | Area [pA*s] | Height [pA] | Area %   |
|--------|---------------|------|-------------|-------------|-------------|----------|
| 1      | 31.438        | MM   | 0.1971      | 20.57044    | 1.73922     | 11.00156 |
| 2      | 34.003        | MM   | 0.2269      | 166.40704   | 12.22372    | 88.99844 |

Totals :                                    186.97748    13.96295

Results obtained with enhanced integrator!

=====  
 \*\*\* End of Report \*\*\*

```

=====
Injection Date   : 4/7/2011 5:51:29 PM      Seq. Line   :    4
Sample Name     :                          Location    : Vial 4
Acq. Operator   : AJO                      Inj         :    1
Acq. Instrument : Instrument 3              Inj Volume  : 1 µl
Different Inj Volume from Sequence !      Actual Inj Volume : 3 µl
Acq. Method     : C:\HPCHEM\3\METHODS\JSSS33B.M
Last changed    : 4/7/2011 4:43:53 PM by JTB
Analysis Method : C:\HPCHEM\3\METHODS\JC100200.M
Last changed    : 4/7/2011 6:44:54 PM by JTB
                  (modified after loading)
=====
    
```

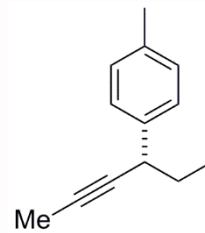

**Equation 4  
with (3R,8S)**

Initial test

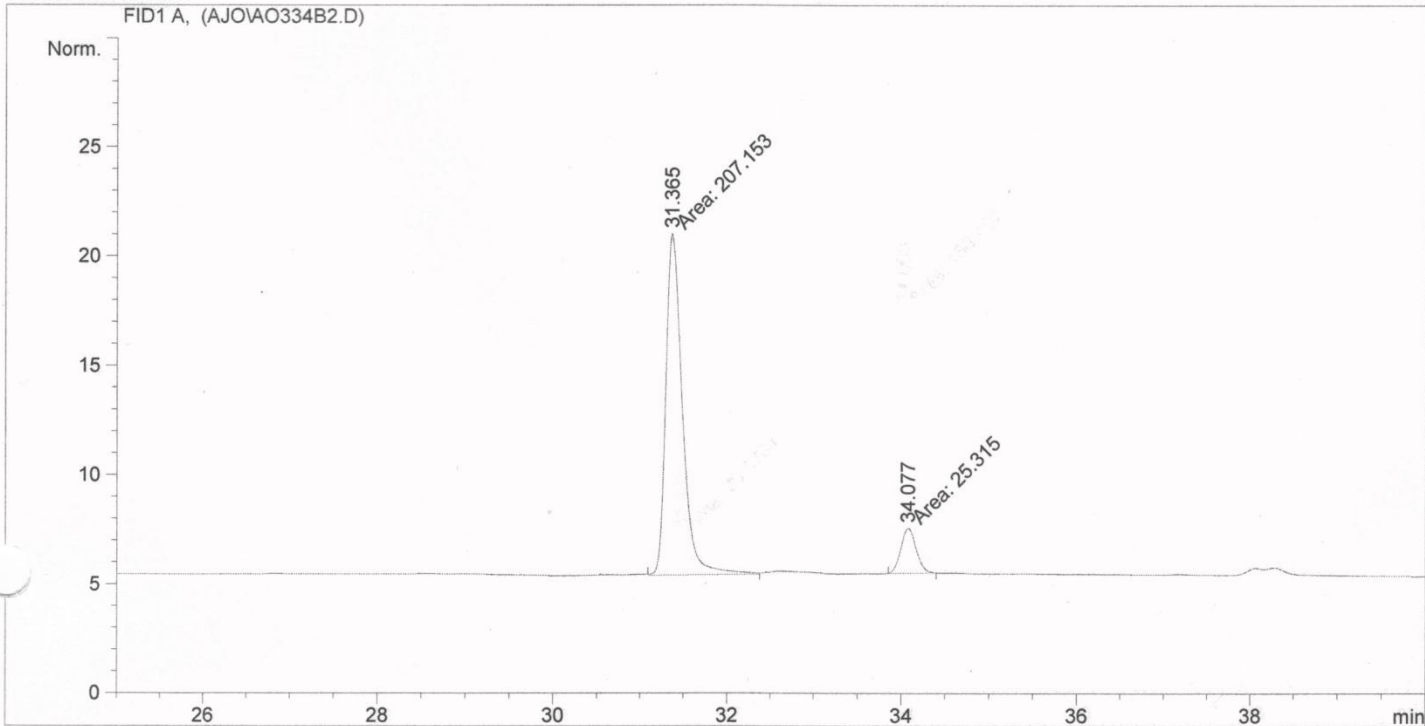

=====  
Area Percent Report  
=====

```

Sorted By      :      Signal
Multiplier     :      1.0000
Dilution       :      1.0000
Use Multiplier & Dilution Factor with ISTDs
    
```

Signal 1: FID1 A,

| Peak # | RetTime [min] | Type | Width [min] | Area [pA*s] | Height [pA] | Area %   |
|--------|---------------|------|-------------|-------------|-------------|----------|
| 1      | 31.365        | MM   | 0.2212      | 207.15323   | 15.60810    | 89.11034 |
| 2      | 34.077        | MM   | 0.2055      | 25.31501    | 2.05351     | 10.88966 |

Totals :                    232.46824    17.66161

Results obtained with enhanced integrator!

=====  
\*\*\* End of Report \*\*\*

```

=====
Injection Date   : 11/29/2011 12:59:25 PM      Seq. Line   :    1
Sample Name     :                               Location    : Vial 3
Acq. Operator   : JC                           Inj         :    1
Acq. Instrument : Instrument 3                  Inj Volume  : 1 µl
Different Inj Volume from Sequence !          Actual Inj Volume : 5 µl
Acq. Method     : C:\HPCHEM\3\METHODS\AJ0100B.M
Last changed    : 12/18/2010 6:48:36 PM by NV
Analysis Method : C:\HPCHEM\3\METHODS\AJ0100D.M
Last changed    : 11/29/2011 1:43:01 PM by JC
                  (modified after loading)
    
```

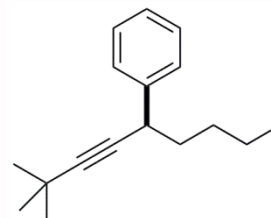

**Equation 5  
with (3S,8R)**

Initial test

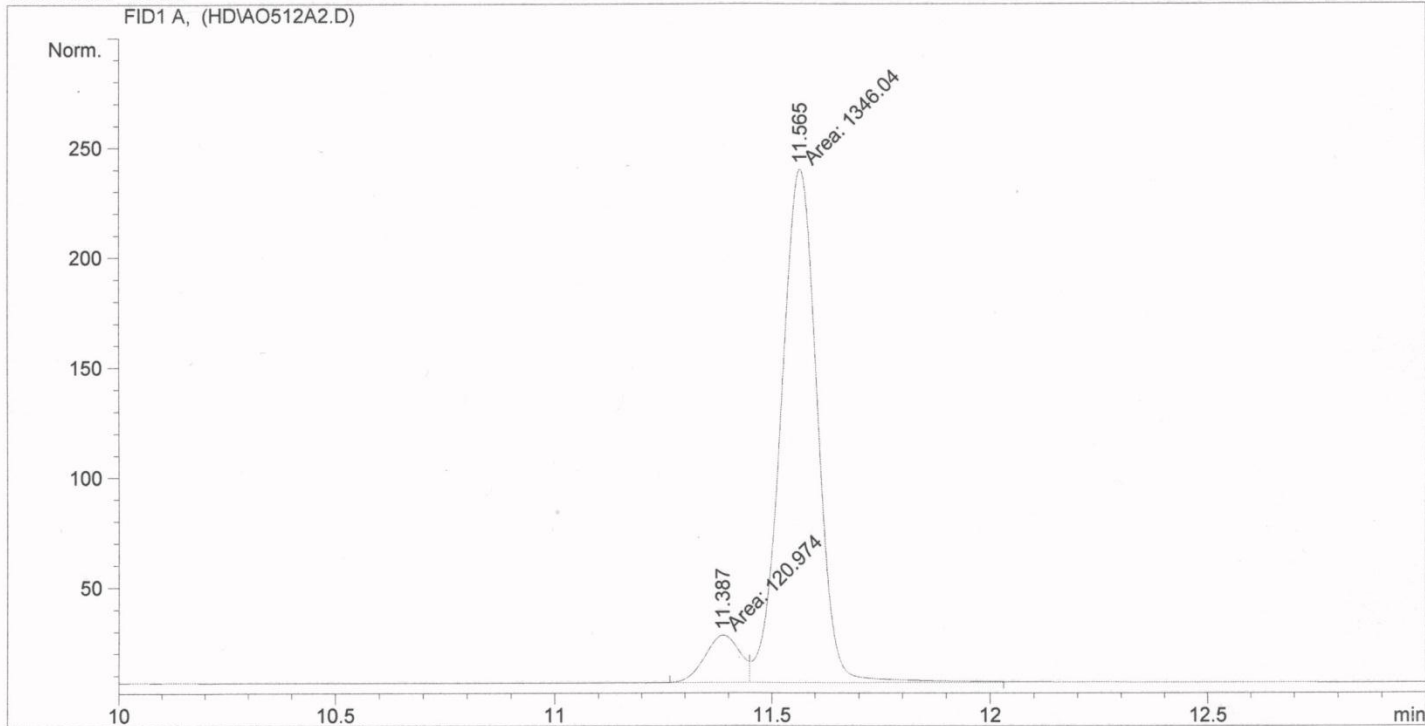

=====  
Area Percent Report  
=====

```

Sorted By      :      Signal
Multiplier     :      1.0000
Dilution       :      1.0000
Use Multiplier & Dilution Factor with ISTDs
    
```

Signal 1: FID1 A,

| Peak # | RetTime [min] | Type | Width [min] | Area [pA*s] | Height [pA] | Area %   |
|--------|---------------|------|-------------|-------------|-------------|----------|
| 1      | 11.387        | MF   | 0.0939      | 120.97383   | 21.47045    | 8.24628  |
| 2      | 11.565        | FM   | 0.0962      | 1346.03687  | 233.19830   | 91.75372 |

84

Totals :                           1467.01070   254.66875

Results obtained with enhanced integrator!

=====  
\*\*\* End of Report \*\*\*

```

=====
Injection Date : 11/29/2011 1:29:42 PM      Seq. Line : 1
Sample Name    :                               Location  : Vial 6
Acq. Operator  : JC                          Inj       : 1
Acq. Instrument : Instrument 3                Inj Volume: 1 µl
Different Inj Volume from Sequence !      Actual Inj Volume: 5 µl
Acq. Method    : C:\HPCHEM\3\METHODS\AJ0100D.M
Last changed   : 11/29/2011 1:27:59 PM by JC
Analysis Method : C:\HPCHEM\3\METHODS\AJ0100D.M
Last changed   : 11/29/2011 1:45:13 PM by JC
                (modified after loading)
    
```

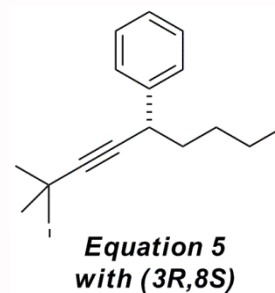

Initial test

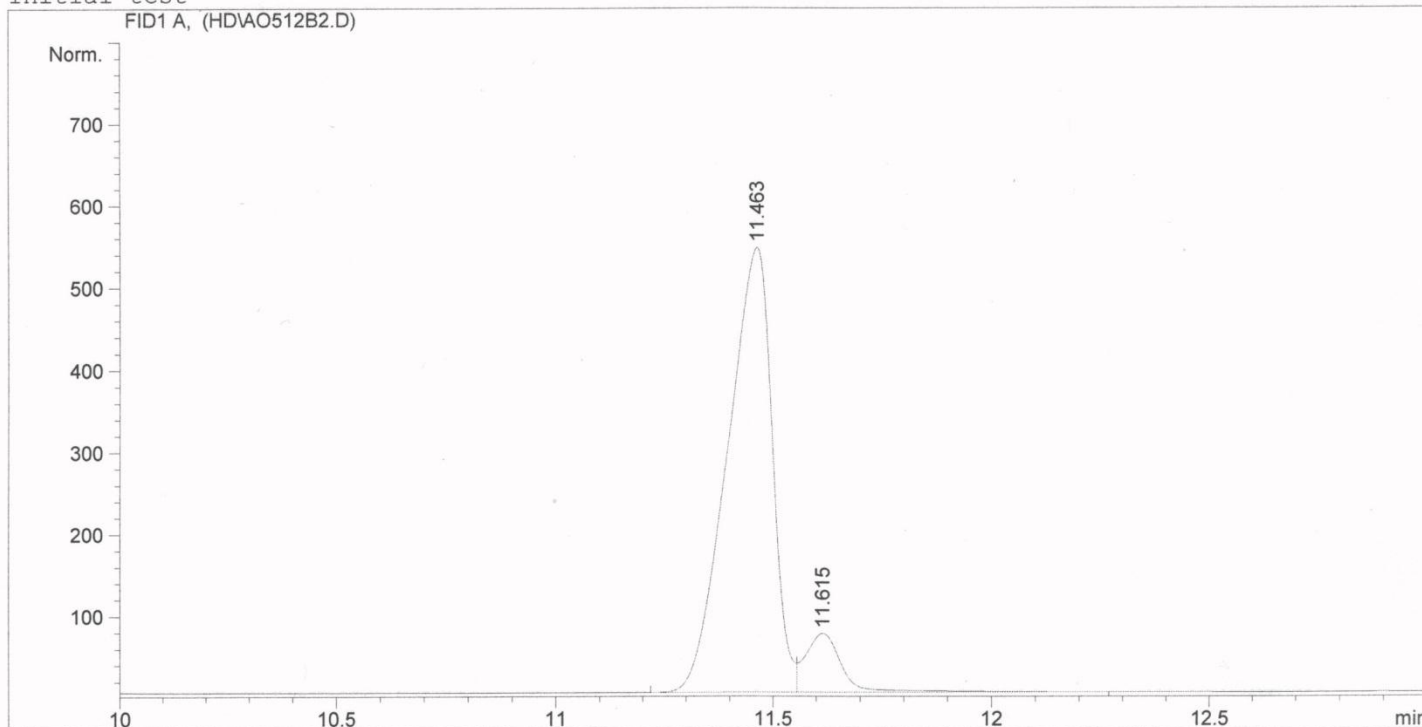

=====  
 Area Percent Report  
 =====

```

Sorted By      : Signal
Multiplier     : 1.0000
Dilution      : 1.0000
Use Multiplier & Dilution Factor with ISTDs
    
```

Signal 1: FID1 A,

| Peak # | RetTime [min] | Type | Width [min] | Area [pA*s] | Height [pA] | Area %   |
|--------|---------------|------|-------------|-------------|-------------|----------|
| 1      | 11.463        | PV   | 0.1057      | 3884.07568  | 541.16205   | 90.29608 |
| 2      | 11.615        | VB   | 0.0868      | 417.41281   | 71.83868    | 9.70392  |

Totals : 4301.48849 613.00072

Results obtained with enhanced integrator!

=====  
 \*\*\* End of Report \*\*\*

Injection Date : 4/7/2011 3:50:21 AM  
 Sample Name : CC  
 Acq. Operator : Instrument 1  
 Different Inj Volume from Sequence : Actual Inj Volume : 15 µl  
 Acq. Method : C:\HPCHEM\1\METHODS\VD-00-30.M  
 Last changed : 4/7/2011 2:46:23 AM by CC  
 Analysis Method : C:\HPCHEM\1\METHODS\AS-10-20.M  
 Last changed : 4/7/2011 8:18:43 AM by CC  
 (modified after loading)

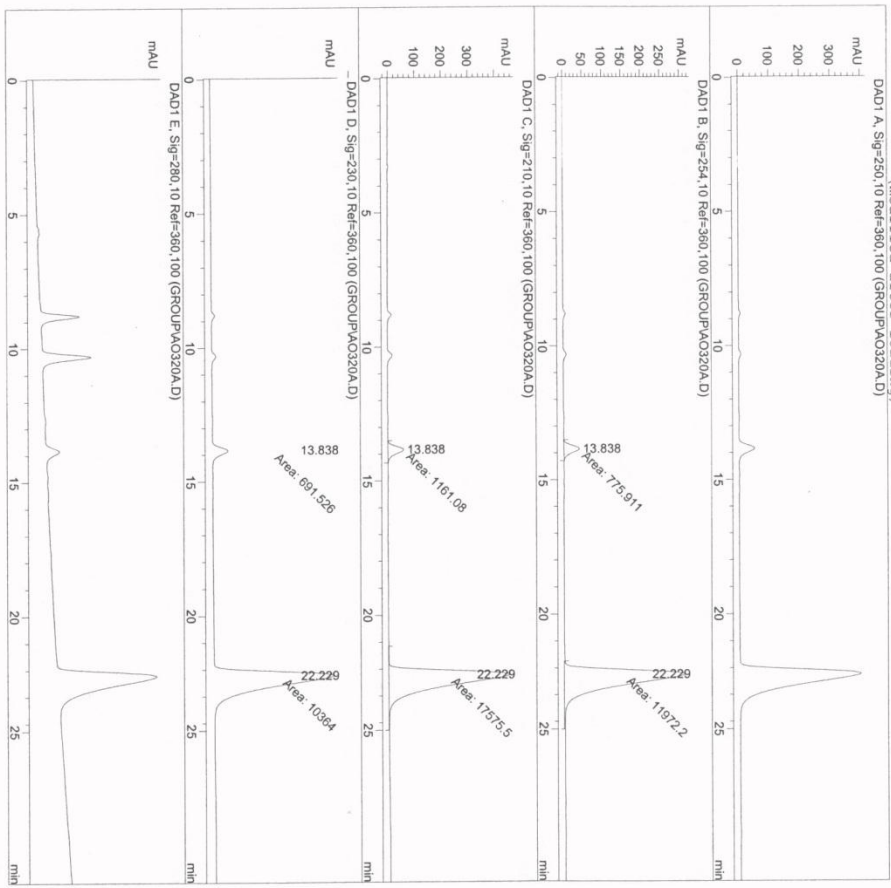

Area Percent Report  
 Sorted By : Signal  
 Multiplier : 1.0000  
 Dilution : 1.0000  
 Use Multiplier & Dilution Factor with ISTDs

Signal 1: DAD1 A, Sig=250,10 Ref=360,100

| Peak #   | RetTime [min] | Type | Width [min] | Area [mAU*s] | Height [mAU] | Area %  |
|----------|---------------|------|-------------|--------------|--------------|---------|
| 1        | 13.838        | MM   | 0.3212      | 775.91058    | 40.26458     | 6.0865  |
| 2        | 22.229        | MM   | 0.6418      | 1.19722e4    | 310.92383    | 93.9135 |
| Totals : |               |      |             | 1.27481e4    | 351.18841    |         |

Signal 3: DAD1 C, Sig=210,10 Ref=360,100

| Peak #   | RetTime [min] | Type | Width [min] | Area [mAU*s] | Height [mAU] | Area %  |
|----------|---------------|------|-------------|--------------|--------------|---------|
| 1        | 13.838        | MM   | 0.3258      | 1161.07666   | 59.39996     | 6.1969  |
| 2        | 22.229        | MM   | 0.6424      | 1.75755e4    | 455.98447    | 93.8031 |
| Totals : |               |      |             | 1.87365e4    | 515.38443    |         |

Signal 4: DAD1 D, Sig=230,10 Ref=360,100

| Peak #   | RetTime [min] | Type | Width [min] | Area [mAU*s] | Height [mAU] | Area %  |
|----------|---------------|------|-------------|--------------|--------------|---------|
| 1        | 13.838        | MM   | 0.3296      | 691.52570    | 34.96553     | 6.2550  |
| 2        | 22.229        | MM   | 0.6352      | 1.03640e4    | 272.78244    | 93.7450 |
| Totals : |               |      |             | 1.10555e4    | 307.74797    |         |

Signal 5: DAD1 E, Sig=280,10 Ref=360,100  
 Results obtained with enhanced integrator!  
 \*\*\* End of Report \*\*\*

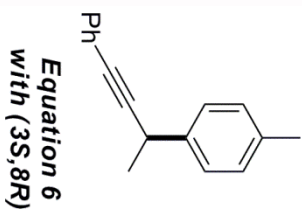

Injection Date : 4/7/2011 4:52:49 AM  
 Sample Name :  
 Acq. Operator : CC  
 Acq. Instrument : Instrument 1  
 Different Inj Volume from Sequence : Actual Inj Volume : 3 µl  
 Acq. Method : C:\HPCHEM\1\METHODS\OD-00-30.M  
 Last changed : 4/7/2011 2:46:23 AM by CC  
 Analysis Method : C:\HPCHEM\1\METHODS\AS-10-20.M  
 Last changed : 4/7/2011 8:18:43 AM by CC  
 (modified after loading)

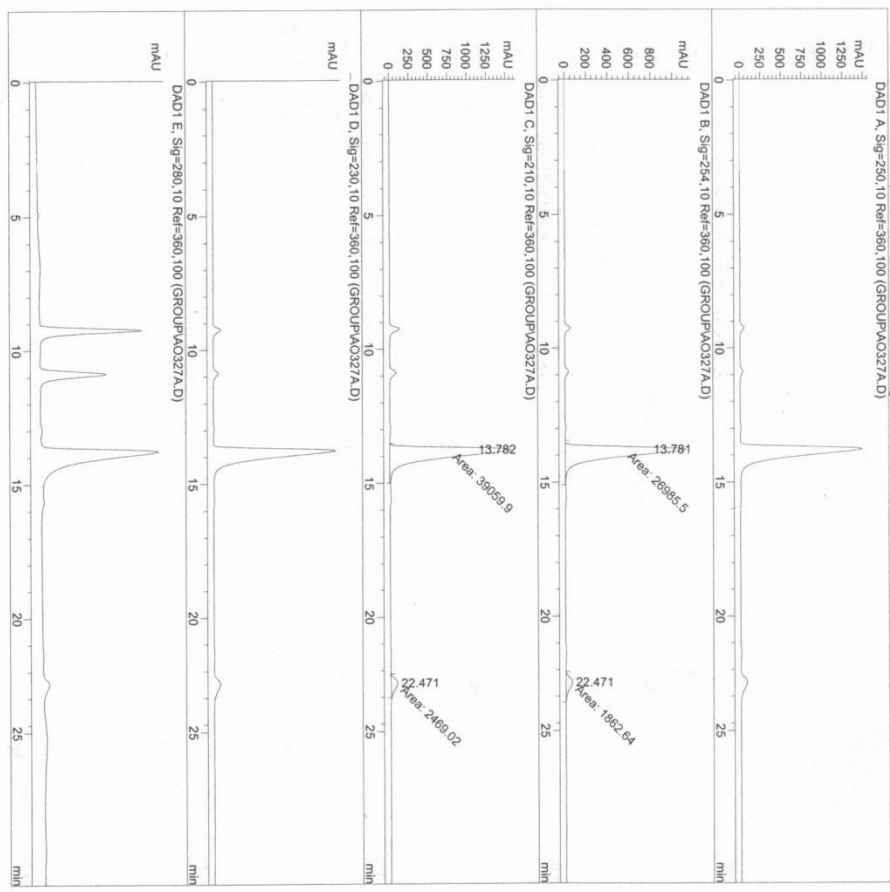

Area Percent Report  
 Sorted By : Signal  
 Multiplier : 1.0000  
 Dilution : 1.0000  
 Use Multiplier & Dilution Factor with ISTDs

Signal 1: DADI A, Sig=250,10 Ref=360,100

| Peak #   | RetTime [min] | Type | Width [min] | Area [mAU*s] | Height [mAU] | Area %  |
|----------|---------------|------|-------------|--------------|--------------|---------|
| 1        | 13.781        | MM   | 0.4006      | 2.69859e4    | 1122.78381   | 93.5433 |
| 2        | 22.471        | MM   | 0.5112      | 1862.64185   | 60.72767     | 6.4567  |
| Totals : |               |      |             | 2.88481e4    | 1183.51148   |         |

Results obtained with enhanced integrator:  
 Signal 3: DADI C, Sig=210,10 Ref=360,100

| Peak #   | RetTime [min] | Type | Width [min] | Area [mAU*s] | Height [mAU] | Area %  |
|----------|---------------|------|-------------|--------------|--------------|---------|
| 1        | 13.782        | MM   | 0.4167      | 3.90599e4    | 1562.4849    | 94.0547 |
| 2        | 22.471        | MM   | 0.4748      | 2469.01538   | 86.66386     | 5.9453  |
| Totals : |               |      |             | 4.15289e4    | 1649.11234   |         |

Results obtained with enhanced integrator:  
 Signal 4: DADI D, Sig=230,10 Ref=360,100  
 Signal 5: DADI E, Sig=280,10 Ref=360,100  
 \*\*\* End of Report \*\*\*

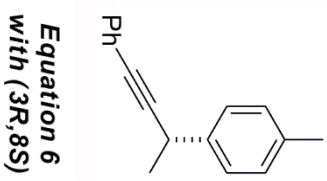



Injection Date : 7/21/2011 10:32:35 PM  
 Sample Name :  
 Acq. Operator : NB  
 Acq. Instrument : Instrument 1  
 Different Inj Volume from Sequence : Actual Inj Volume : 15 µl  
 Acq. Method : C:\HPCHEM\1\METHODS\IB-03-60.M  
 Last changed : 4/7/2011 8:06:41 PM by CC  
 Analysis Method : C:\HPCHEM\1\METHODS\VI-AD03.M  
 Last changed : 10/10/2011 10:15:56 AM by NB  
 Last changed : (modified after loading)

Seq. Line : 78  
 Location : Vial 95  
 Inj : 1  
 Inj Volume : 2 µl

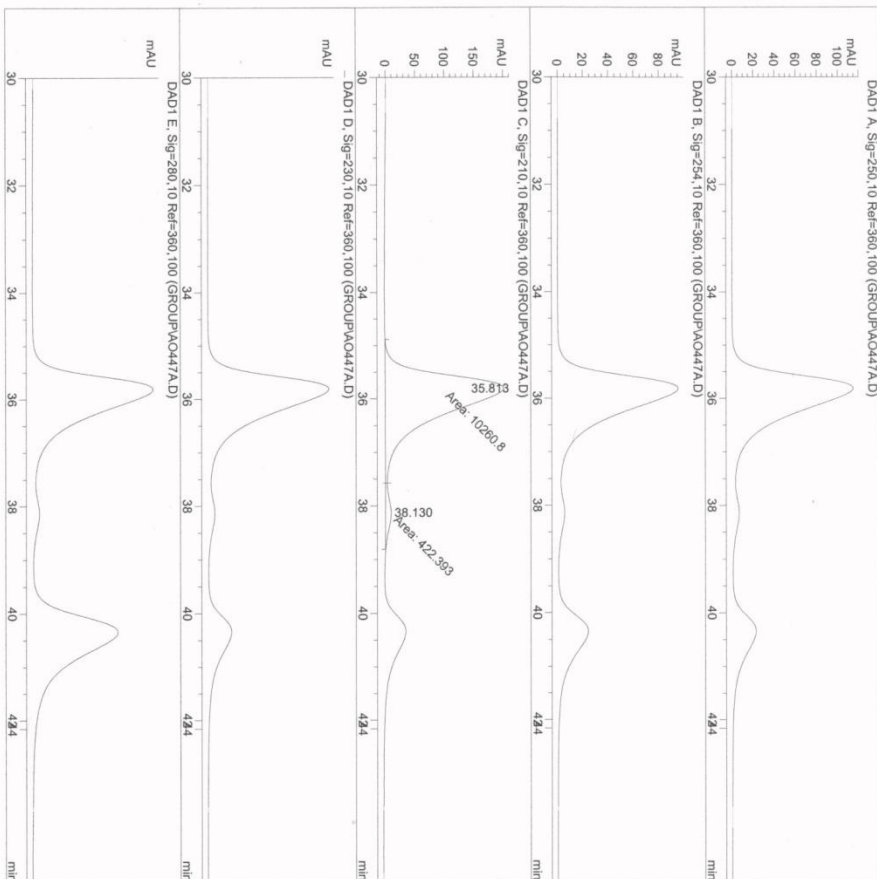

Area Percent Report

Sorted By : Signal  
 Multiplier : 1.0000  
 Dilution : 1.0000  
 Use Multiplier & Dilution Factor with ISTDs

Signal 1: DAD1 A, Sig=250,10 Ref=360,100

Signal 2: DAD1 B, Sig=254,10 Ref=360,100

Signal 3: DAD1 C, Sig=210,10 Ref=360,100

| Peak # | RetTime [min] | Type | Width [min] | Area [mAU*s] | Height [mAU] | Area %  |
|--------|---------------|------|-------------|--------------|--------------|---------|
| 1      | 35.813        | MF   | 0.8466      | 1.02608e4    | 201.99796    | 96.0462 |
| 2      | 38.130        | FM   | 0.7286      | 422.39297    | 9.66245      | 3.9538  |

Totals : 1.06832e4 211.66041

Results obtained with enhanced integrator:

Signal 4: DAD1 D, Sig=230,10 Ref=360,100

Signal 5: DAD1 E, Sig=280,10 Ref=360,100

\*\*\* End of Report \*\*\*

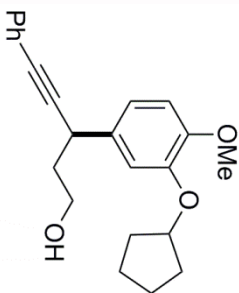

Equation 7  
 with (3S,8R)

Injection Date : 7/21/2011 11:33:47 PM  
 Sample Name :  
 Acq. Operator : NB  
 Acq. Instrument : Instrument 1  
 Acq. Method : C:\HPCHEM\1\METHODS\IB-03-60.M  
 Last changed : 4/7/2011 8:06:41 PM by CC  
 Analysis Method : C:\HPCHEM\1\METHODS\Y1-A003.M  
 Last changed : 10/10/2011 10:16:35 AM by NB  
 (modified after loading)

Seq. Line : 79  
 Location : Vial 96  
 Inj : 1  
 Inj Volume : 15 µl  
 Actual Inj Volume : 2 µl

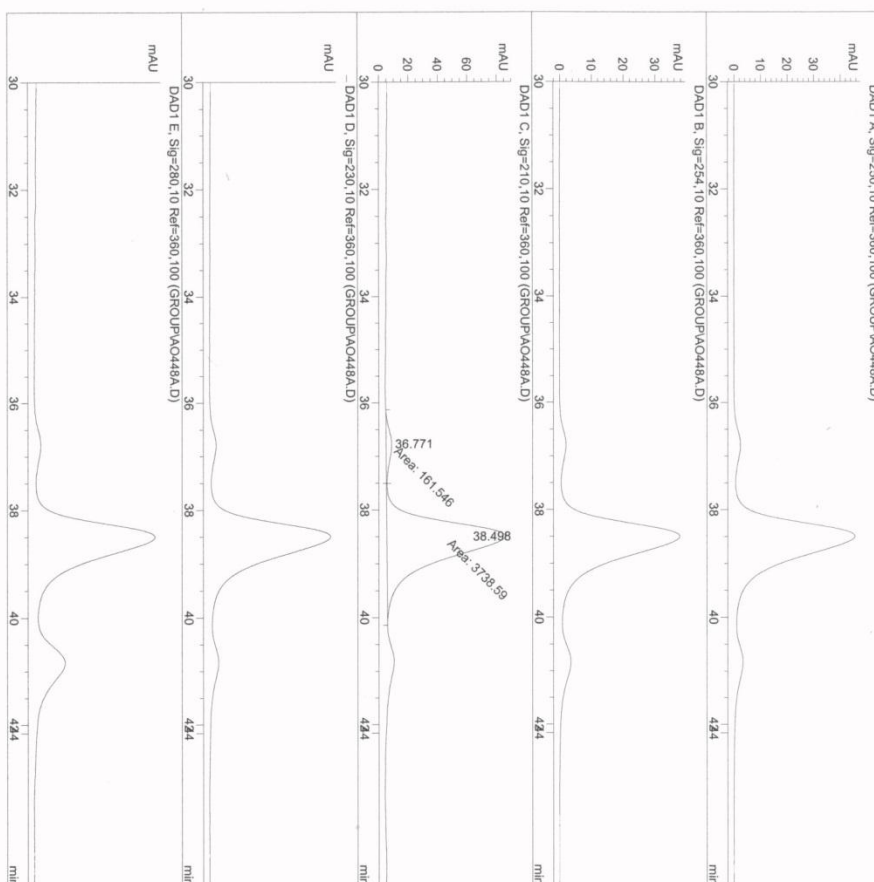

Area Percent Report

Sorted By : Signal  
 Multiplier : 1.0000  
 Dilution : 1.0000  
 Use Multiplier & Dilution Factor with ISTDs

| Signal                                   | RetTime [min] | Type | Width [min] | Area [mAU*s] | Height [mAU] | Area %  |
|------------------------------------------|---------------|------|-------------|--------------|--------------|---------|
| Signal 1: DAD1 A, Sig=250,10 Ref=360,100 | 36.771        | MF   | 0.7140      | 161,54572    | 3.77105      | 4.1420  |
| Signal 2: DAD1 B, Sig=254,10 Ref=360,100 | 38.498        | FM   | 0.7727      | 3738.59351   | 80.63858     | 95.8580 |
| Totals :                                 |               |      |             | 3900.13922   | 84.40964     |         |

Results obtained with enhanced integrator!

Signal 4: DAD1 D, Sig=230,10 Ref=360,100  
 Signal 5: DAD1 E, Sig=280,10 Ref=360,100

\*\*\* End of Report \*\*\*

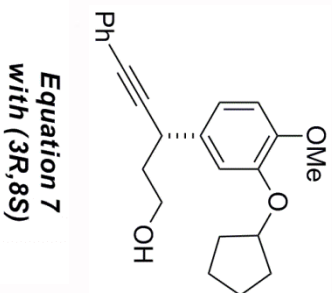

```

=====
Injection Date : 12/11/2011 3:42:42 PM      Seq. Line : 11
Sample Name   :                               Location  : Vial 1
Acq. Operator : hd                           Inj       : 1
Acq. Instrument : Instrument 3                 Inj Volume: 1 µl
Different Inj Volume from Sequence !          Actual Inj Volume: 5 µl
Acq. Method   : C:\HPCHEM\3\METHODS\AJ0100.M
Last changed  : 10/13/2010 9:09:31 AM by AJ0
Analysis Method : C:\HPCHEM\3\METHODS\CJC18.M
Last changed  : 1/22/2012 2:18:26 PM by HD
                (modified after loading)
=====
    
```

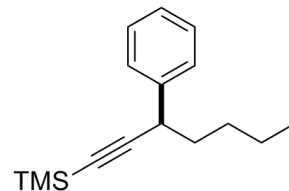

Equation 8  
with (3S,8R)

Initial test

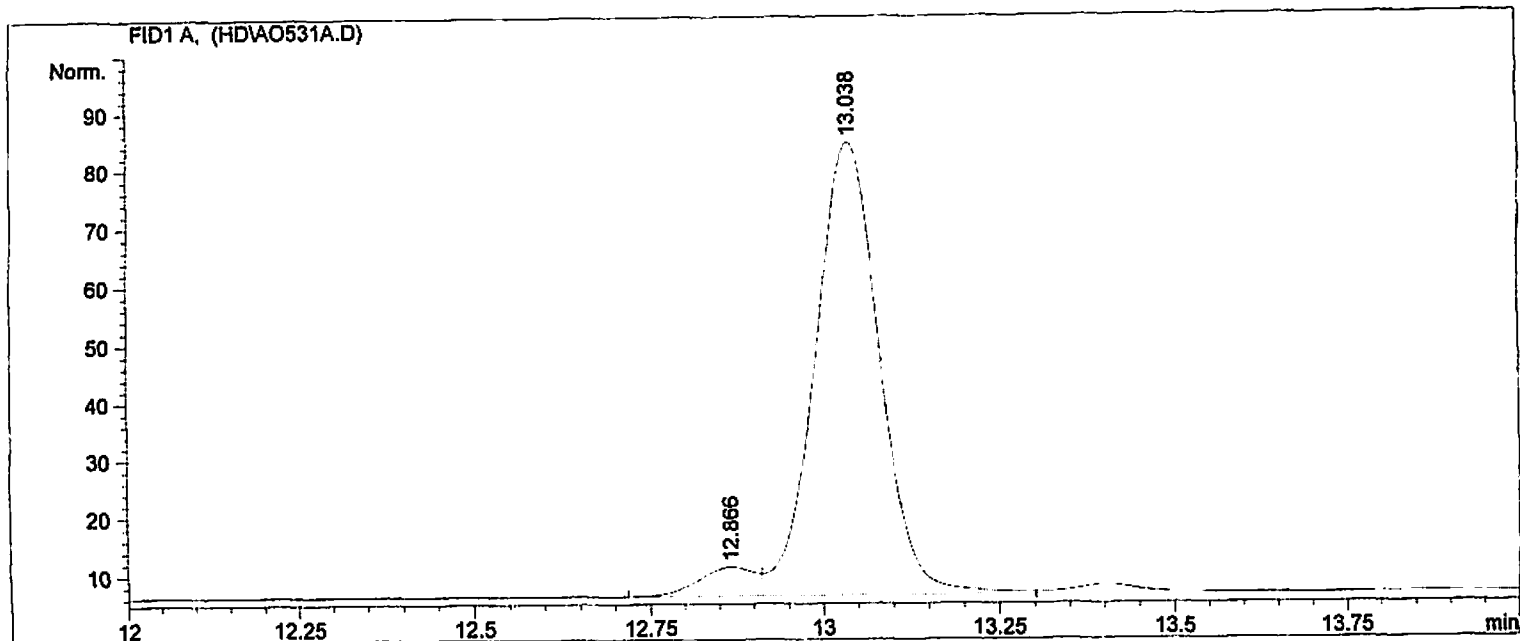

=====  
Area Percent Report  
=====

```

Sorted By      :      Signal
Multiplier     :      1.0000
Dilution       :      1.0000
Use Multiplier & Dilution Factor with ISTDs
    
```

Signal 1: FID1 A,

| Peak # | RetTime [min] | Type | Width [min] | Area [pA*s] | Height [pA] | Area %   |
|--------|---------------|------|-------------|-------------|-------------|----------|
| 1      | 12.866        | PV   | 0.0850      | 27.32010    | 4.90110     | 5.19883  |
| 2      | 13.038        | VV   | 0.0985      | 498.18481   | 77.99696    | 94.80117 |

Totals :                                   525.50491   82.89806

Results obtained with enhanced integrator!

=====  
\*\*\* End of Report \*\*\*

```

=====
Injection Date : 12/11/2011 4:08:47 PM      Seq. Line : 12
Sample Name   :                               Location  : Vial 2
Acq. Operator : hd                           Inj       : 1
Acq. Instrument : Instrument 3                Inj Volume: 1 µl
Different Inj Volume from Sequence !      Actual Inj Volume : 5 µl
Acq. Method   : C:\HPCHEM\3\METHODS\AJ0100.M
Last changed  : 10/13/2010 9:09:31 AM by AJ0
Analysis Method : C:\HPCHEM\3\METHODS\CJC18.M
Last changed  : 1/22/2012 2:19:19 PM by HD
              (modified after loading)
=====
    
```

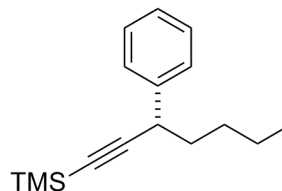

Equation 8  
with (3R,8S)

Initial test

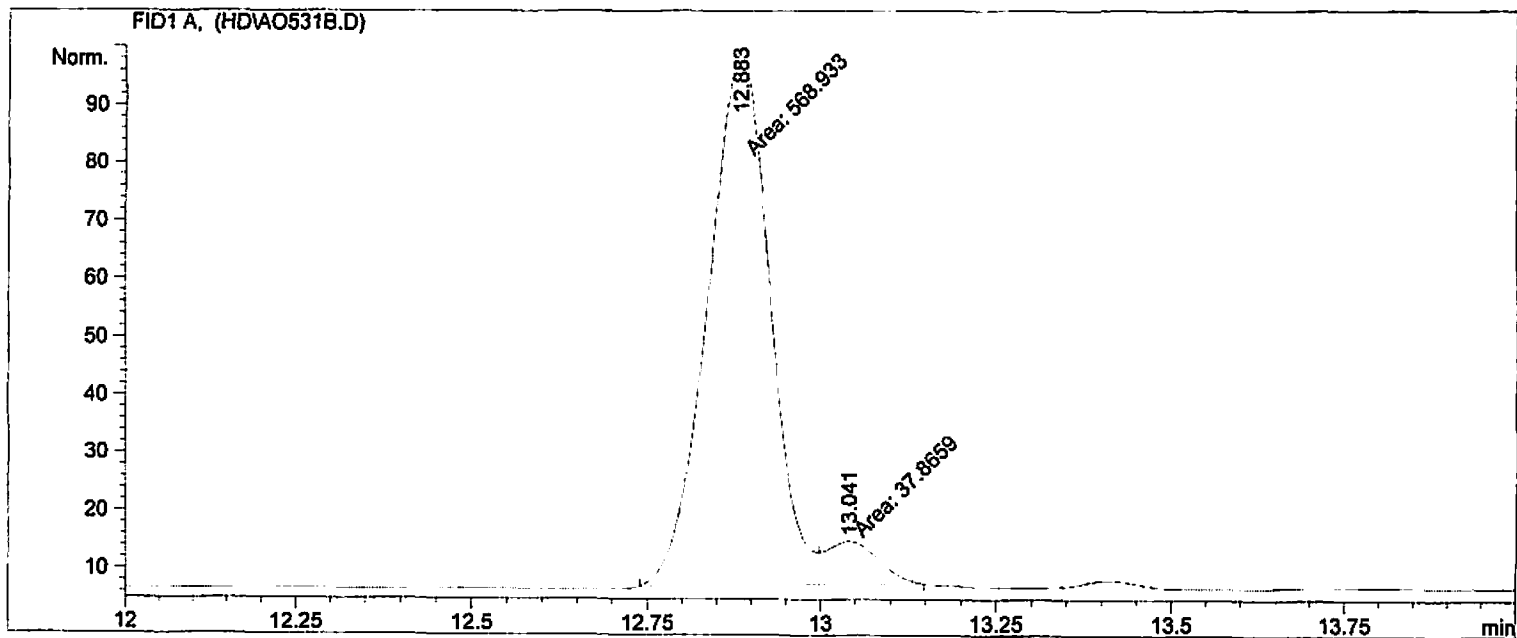

=====  
Area Percent Report  
=====

```

Sorted By      : Signal
Multiplier     : 1.0000
Dilution       : 1.0000
Use Multiplier & Dilution Factor with ISTDs
    
```

Signal 1: FID1 A,

| Peak # | RetTime [min] | Type | Width [min] | Area [pA*s] | Height [pA] | Area %   |
|--------|---------------|------|-------------|-------------|-------------|----------|
| 1      | 12.883        | MF   | 0.1037      | 568.93274   | 91.43867    | 93.75972 |
| 2      | 13.041        | FM   | 0.0858      | 37.86594    | 7.35501     | 6.24028  |

Totals :                      606.79868    98.79369

Results obtained with enhanced integrator!

=====  
\*\*\* End of Report \*\*\*

```

=====
Injection Date   : 12/11/2011 4:34:56 PM      Seq. Line   : 13
Sample Name     :                               Location    : Vial 3
Acq. Operator  : hd                            Inj         : 1
Acq. Instrument : Instrument 3                 Inj Volume  : 1 µl
Different Inj Volume from Sequence !          Actual Inj Volume : 5 µl
Acq. Method    : C:\HPCHEM\3\METHODS\AJ0100.M
Last changed   : 10/13/2010 9:09:31 AM by AJO
Analysis Method : C:\HPCHEM\3\METHODS\CJC18.M
Last changed   : 1/22/2012 2:21:35 PM by HD
                (modified after loading)
=====

```

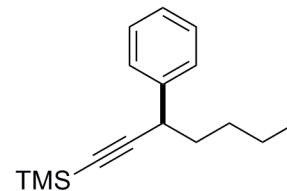

Equation 9  
with (3S,8R)

Initial test

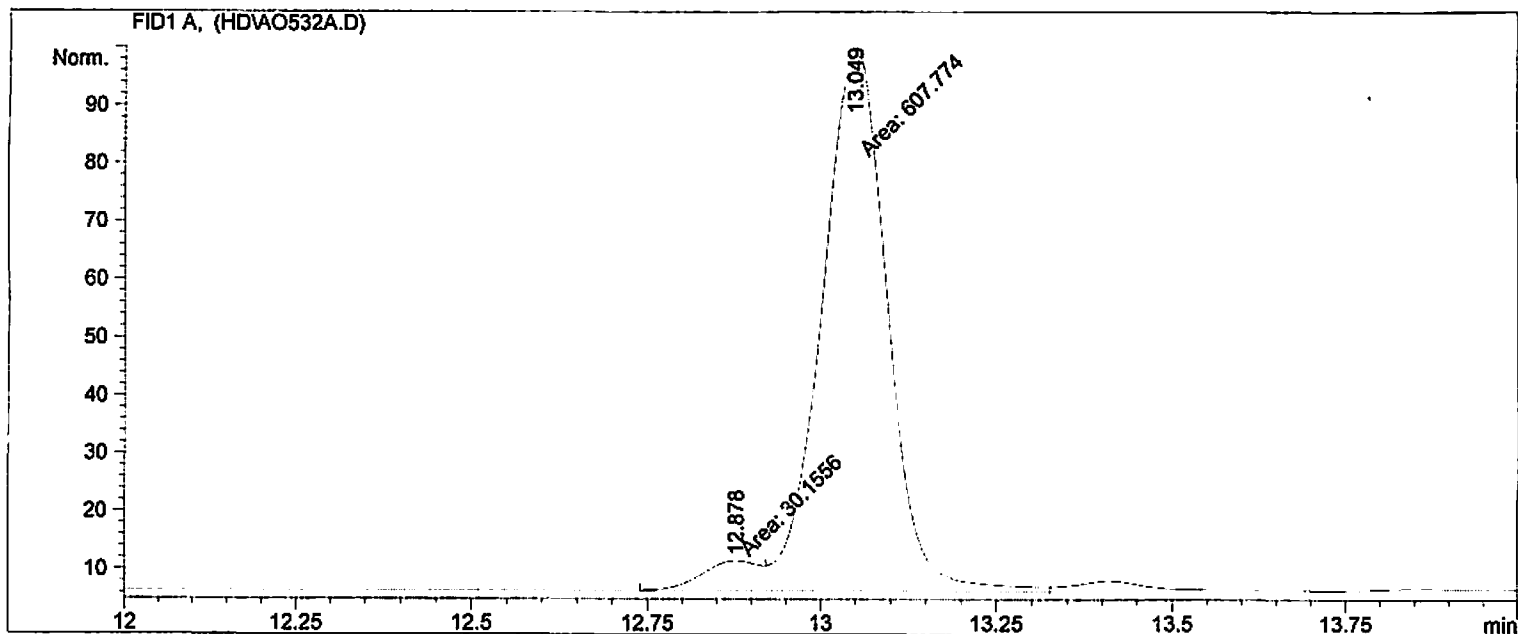

=====  
Area Percent Report  
=====

```

Sorted By      : Signal
Multiplier    : 1.0000
Dilution      : 1.0000
Use Multiplier & Dilution Factor with ISTDs

```

Signal 1: FID1 A,

| Peak # | RetTime [min] | Type | Width [min] | Area [pA*s] | Height [pA] | Area %   |
|--------|---------------|------|-------------|-------------|-------------|----------|
| 1      | 12.878        | MF   | 0.0974      | 30.15556    | 5.15921     | 4.72710  |
| 2      | 13.049        | FM   | 0.1080      | 607.77362   | 93.80832    | 95.27290 |

Totals :                      637.92918    98.96753

Results obtained with enhanced integrator!

=====  
\*\*\* End of Report \*\*\*

```

=====
Injection Date : 12/11/2011 5:01:01 PM      Seq. Line : 14
Sample Name    :                               Location  : Vial 4
Acq. Operator  : hd                          Inj       : 1
Acq. Instrument : Instrument 3                Inj Volume: 1 µl
Different Inj Volume from Sequence !      Actual Inj Volume : 5 µl
Acq. Method    : C:\HPCHEM\3\METHODS\AJ0100.M
Last changed   : 10/13/2010 9:09:31 AM by AJ0
Analysis Method : C:\HPCHEM\3\METHODS\CJC18.M
Last changed   : 1/22/2012 2:23:52 PM by HD
                    (modified after loading)
=====
    
```

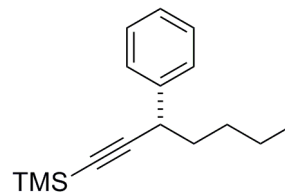

Equation 9  
with (3R,8S)

Initial test

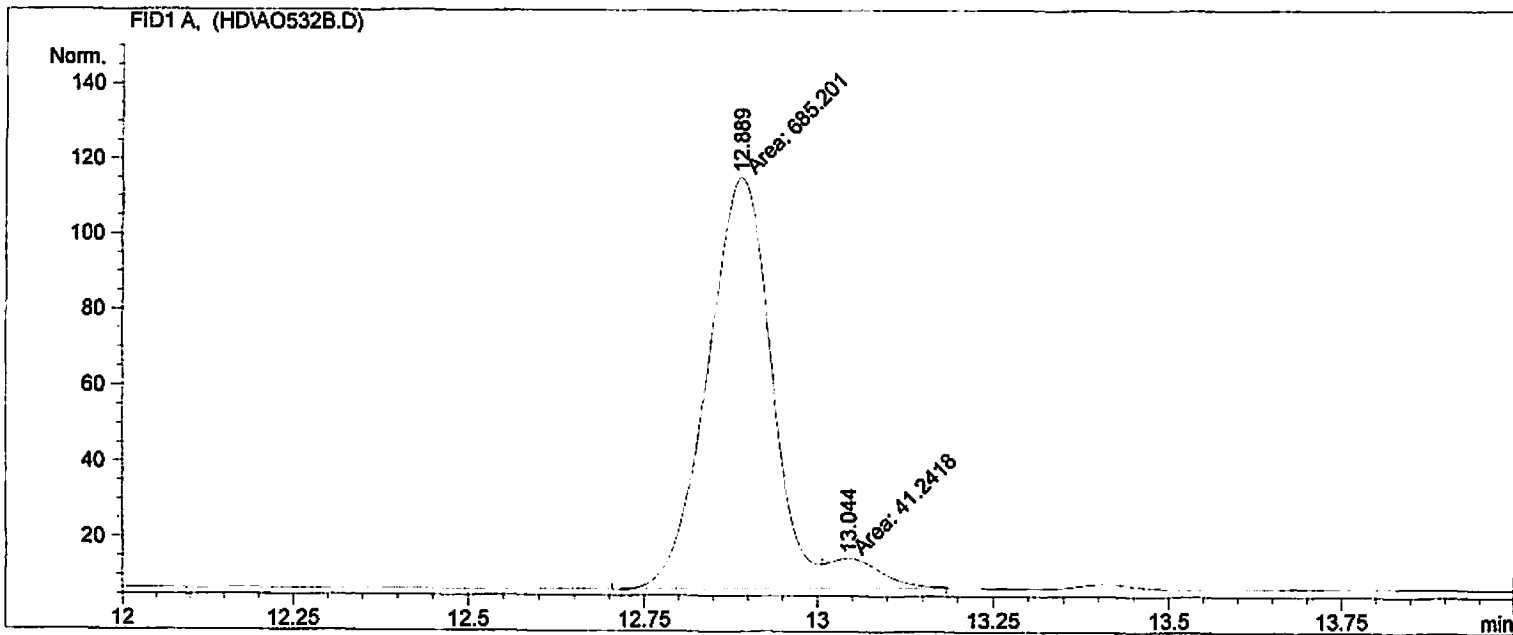

=====  
Area Percent Report  
=====

```

Sorted By      : Signal
Multiplier     : 1.0000
Dilution       : 1.0000
Use Multiplier & Dilution Factor with ISTDs
    
```

Signal 1: FID1 A,

| Peak # | RetTime [min] | Type | Width [min] | Area [pA*s] | Height [pA] | Area %   |
|--------|---------------|------|-------------|-------------|-------------|----------|
| 1      | 12.889        | MF   | 0.1053      | 685.20050   | 108.47028   | 94.32277 |
| 2      | 13.044        | FM   | 0.0895      | 41.24178    | 7.68089     | 5.67723  |

Totals : 726.44228 116.15118

Results obtained with enhanced integrator!

=====  
\*\*\* End of Report \*\*\*
